# Supplementary material
Source: PubMed Central journal article supplement (PMC8462800)

# Extended Data Fig 5a

Granta 519

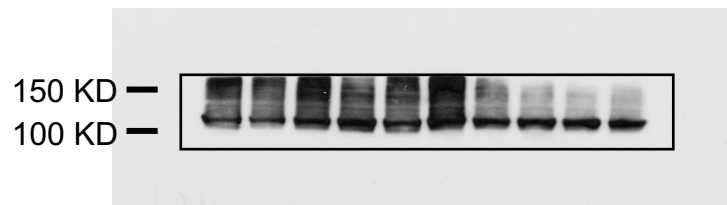

pRb

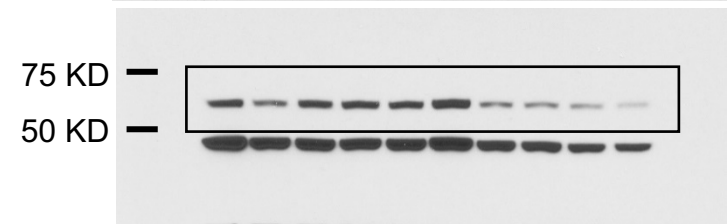

PLK1

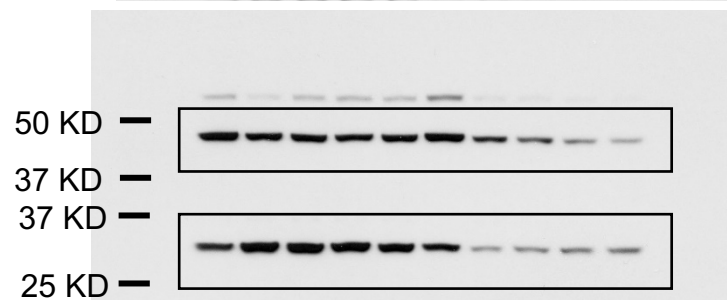

cyclin A

CDK4

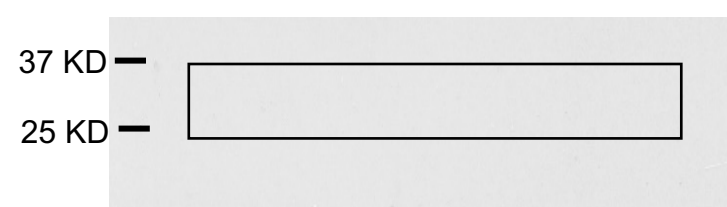

CDK6

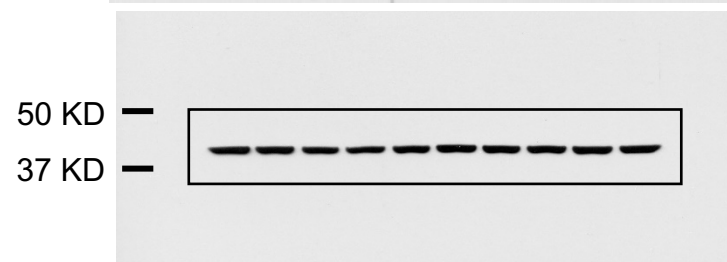

actin

JeKo-1

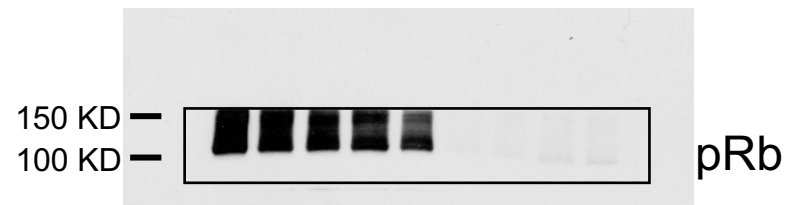

pRb

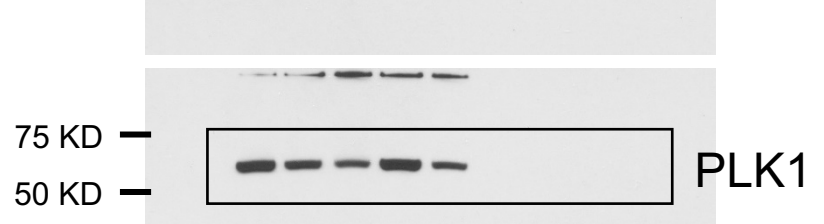

PLK1

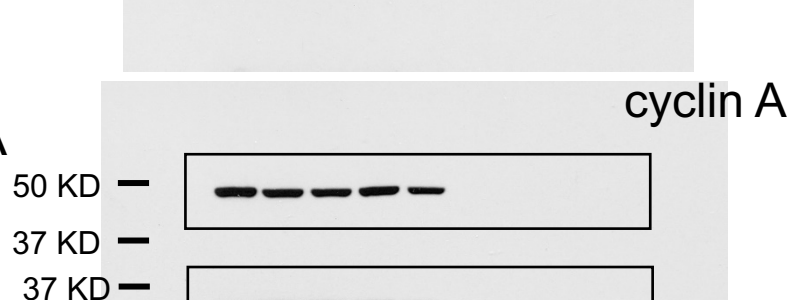

cyclin A

CDK4

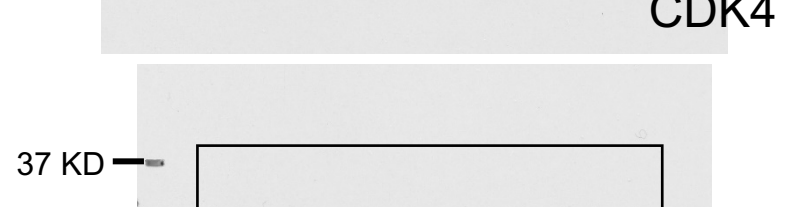

CDK6

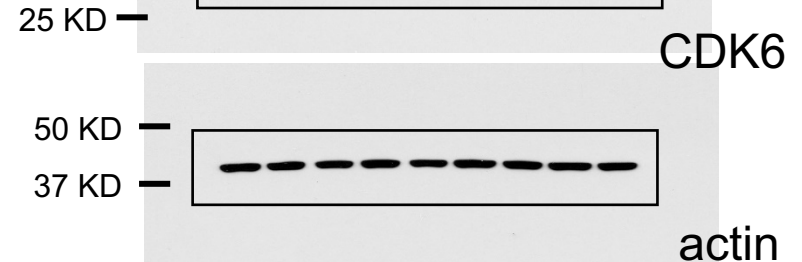

actin

# Extended Data Fig 5a

Mino

Z138

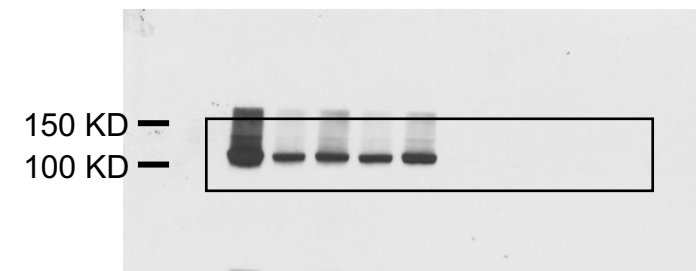

pRb

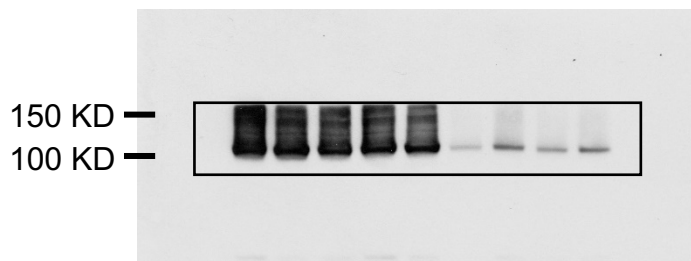

pRb

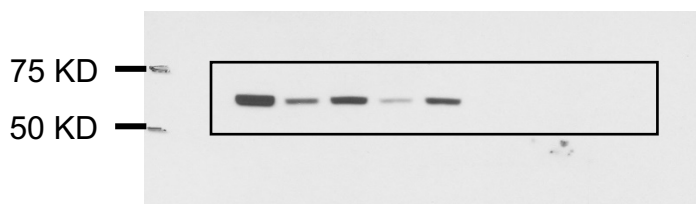

PLK1

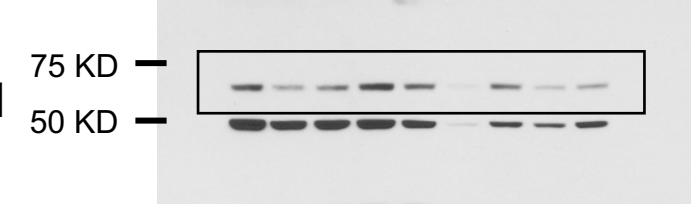

PLK1

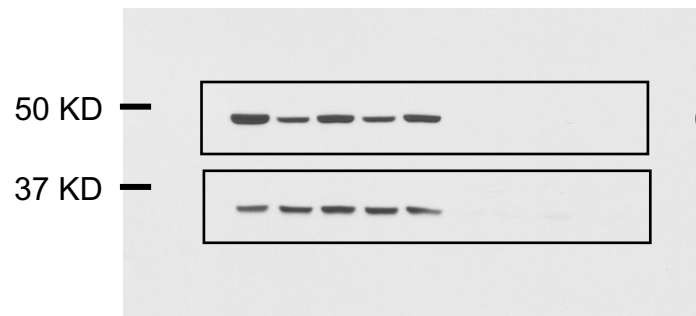

cyclin A

CDK4

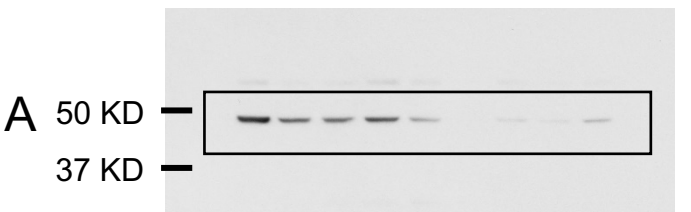

cyclin A

CDK4

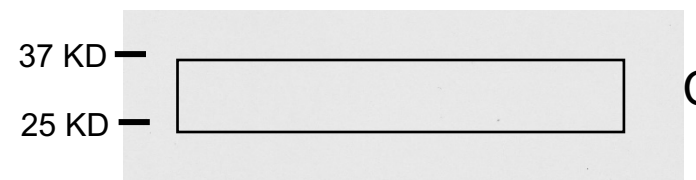

CDK6

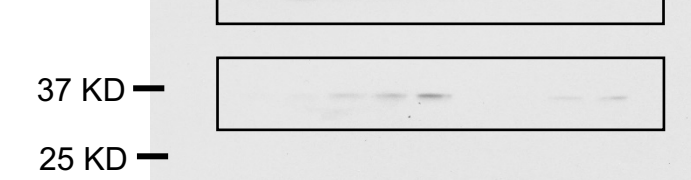

CDK6

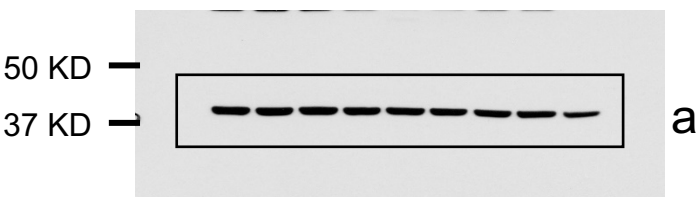

actin

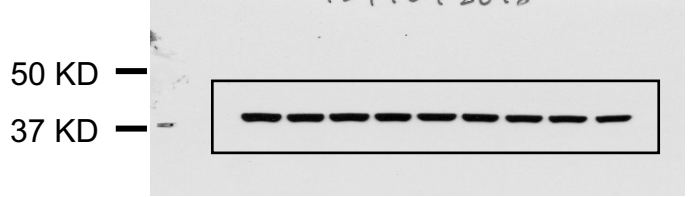

actin

# Extended Data Fig 5b

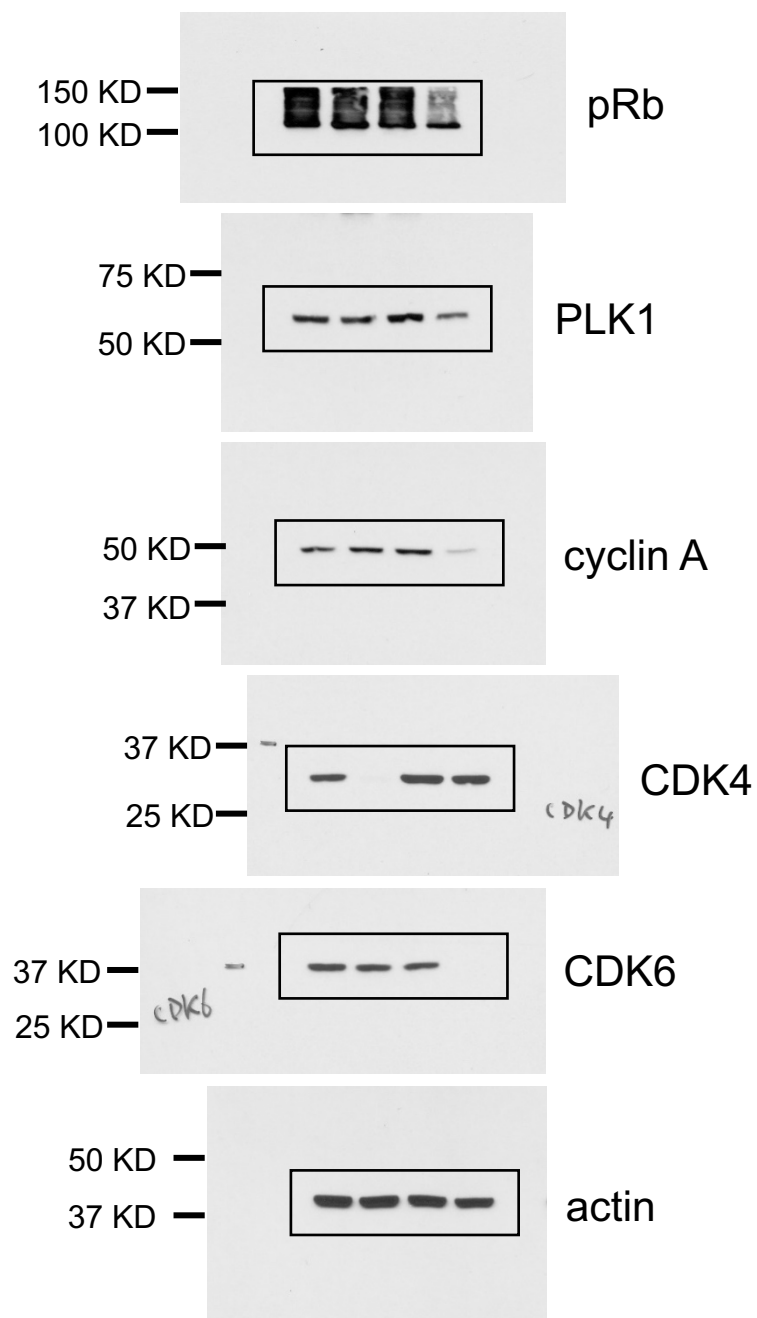

Supplement: NIHMS1684820-supplement-EXT_FIG_5__Source_Data_-_Immunoblots.pdf [file NIHMS1684820-supplement-EXT_FIG_5__Source_Data_-_Immunoblots.pdf]
