# Supplementary material
Source: PubMed Central journal article supplement (PMC8462800)

**Figure 1b**

MCF7 HCT116

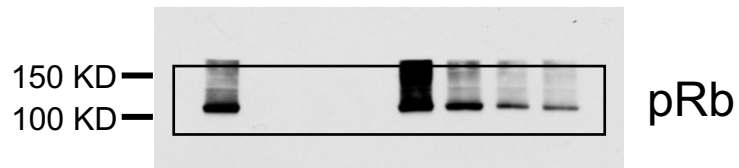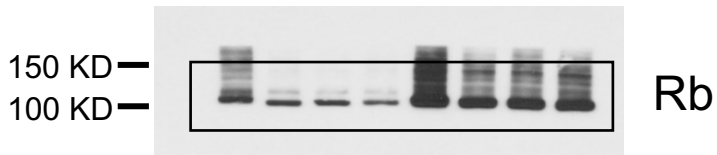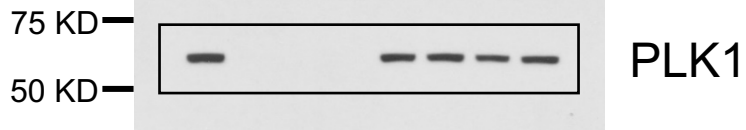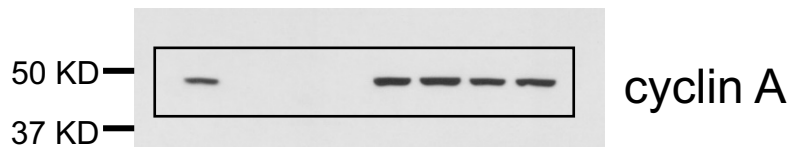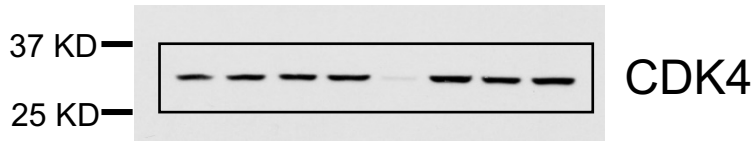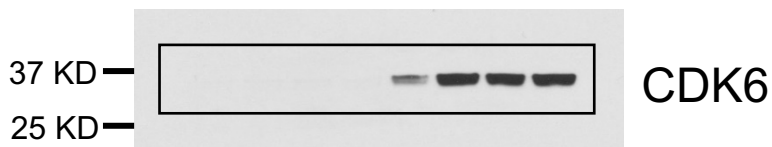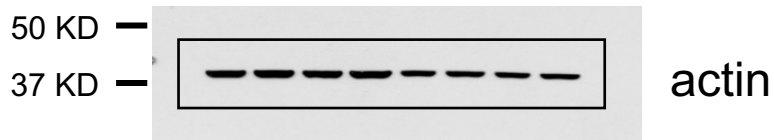

T47D Calu6

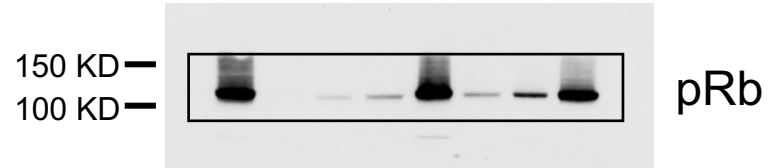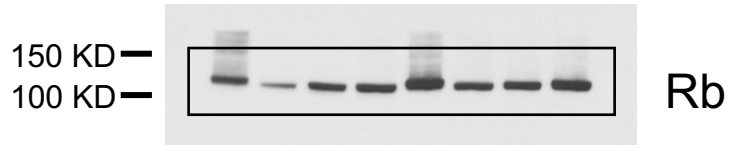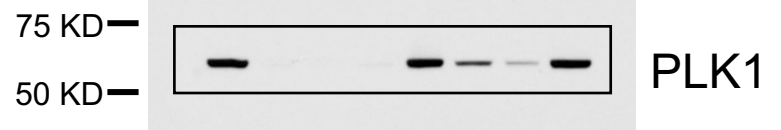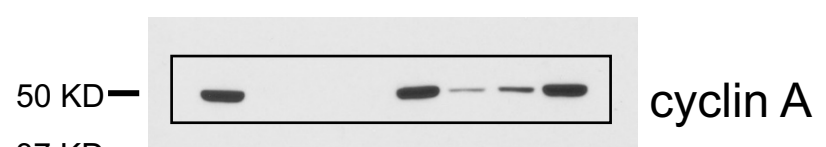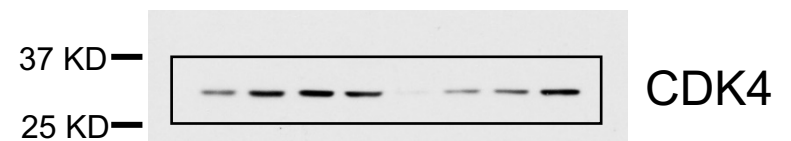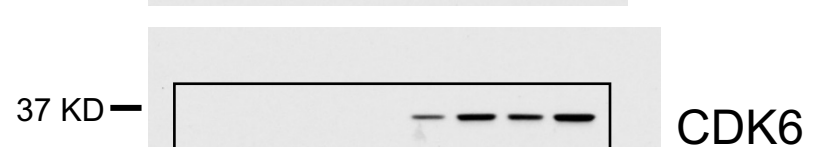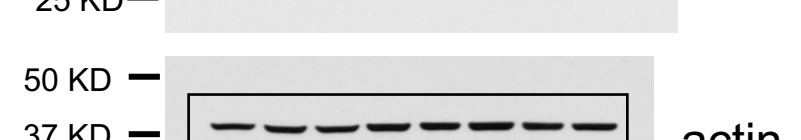

**Figure 1b**

ZR-75-1 HCT15

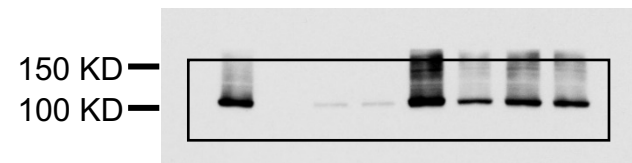

pRb

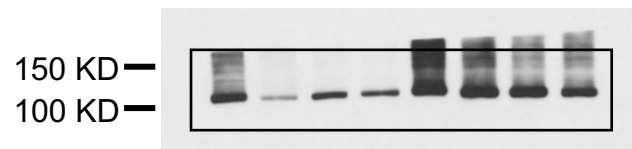

Rb

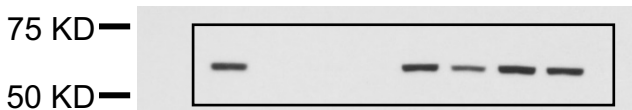

PLK1

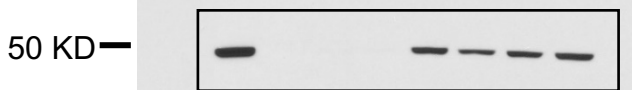

cyclin A

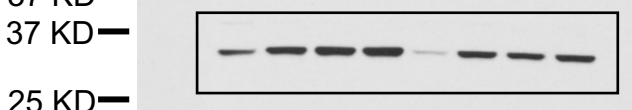

CDK4

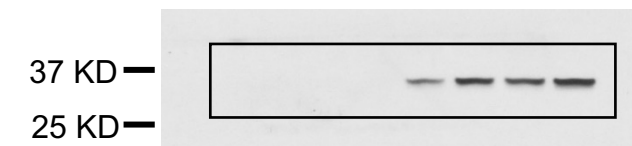

CDK6

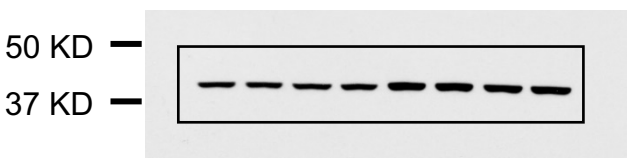

actin

Huh-7 A375

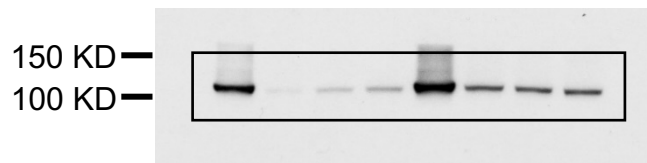

pRb

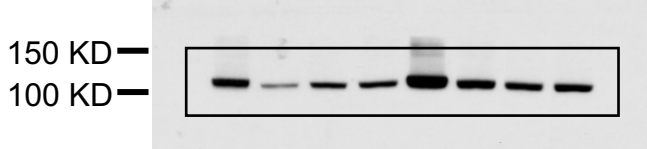

Rb

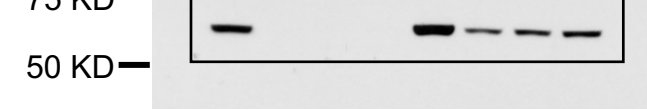

PLK1

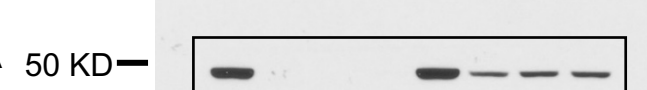

cyclin A

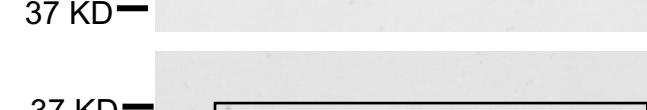

CDK4

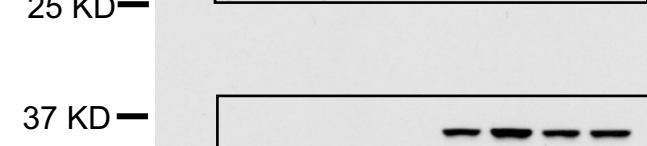

CDK6

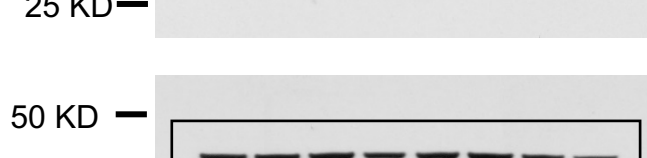

actin

**Figure 1b**

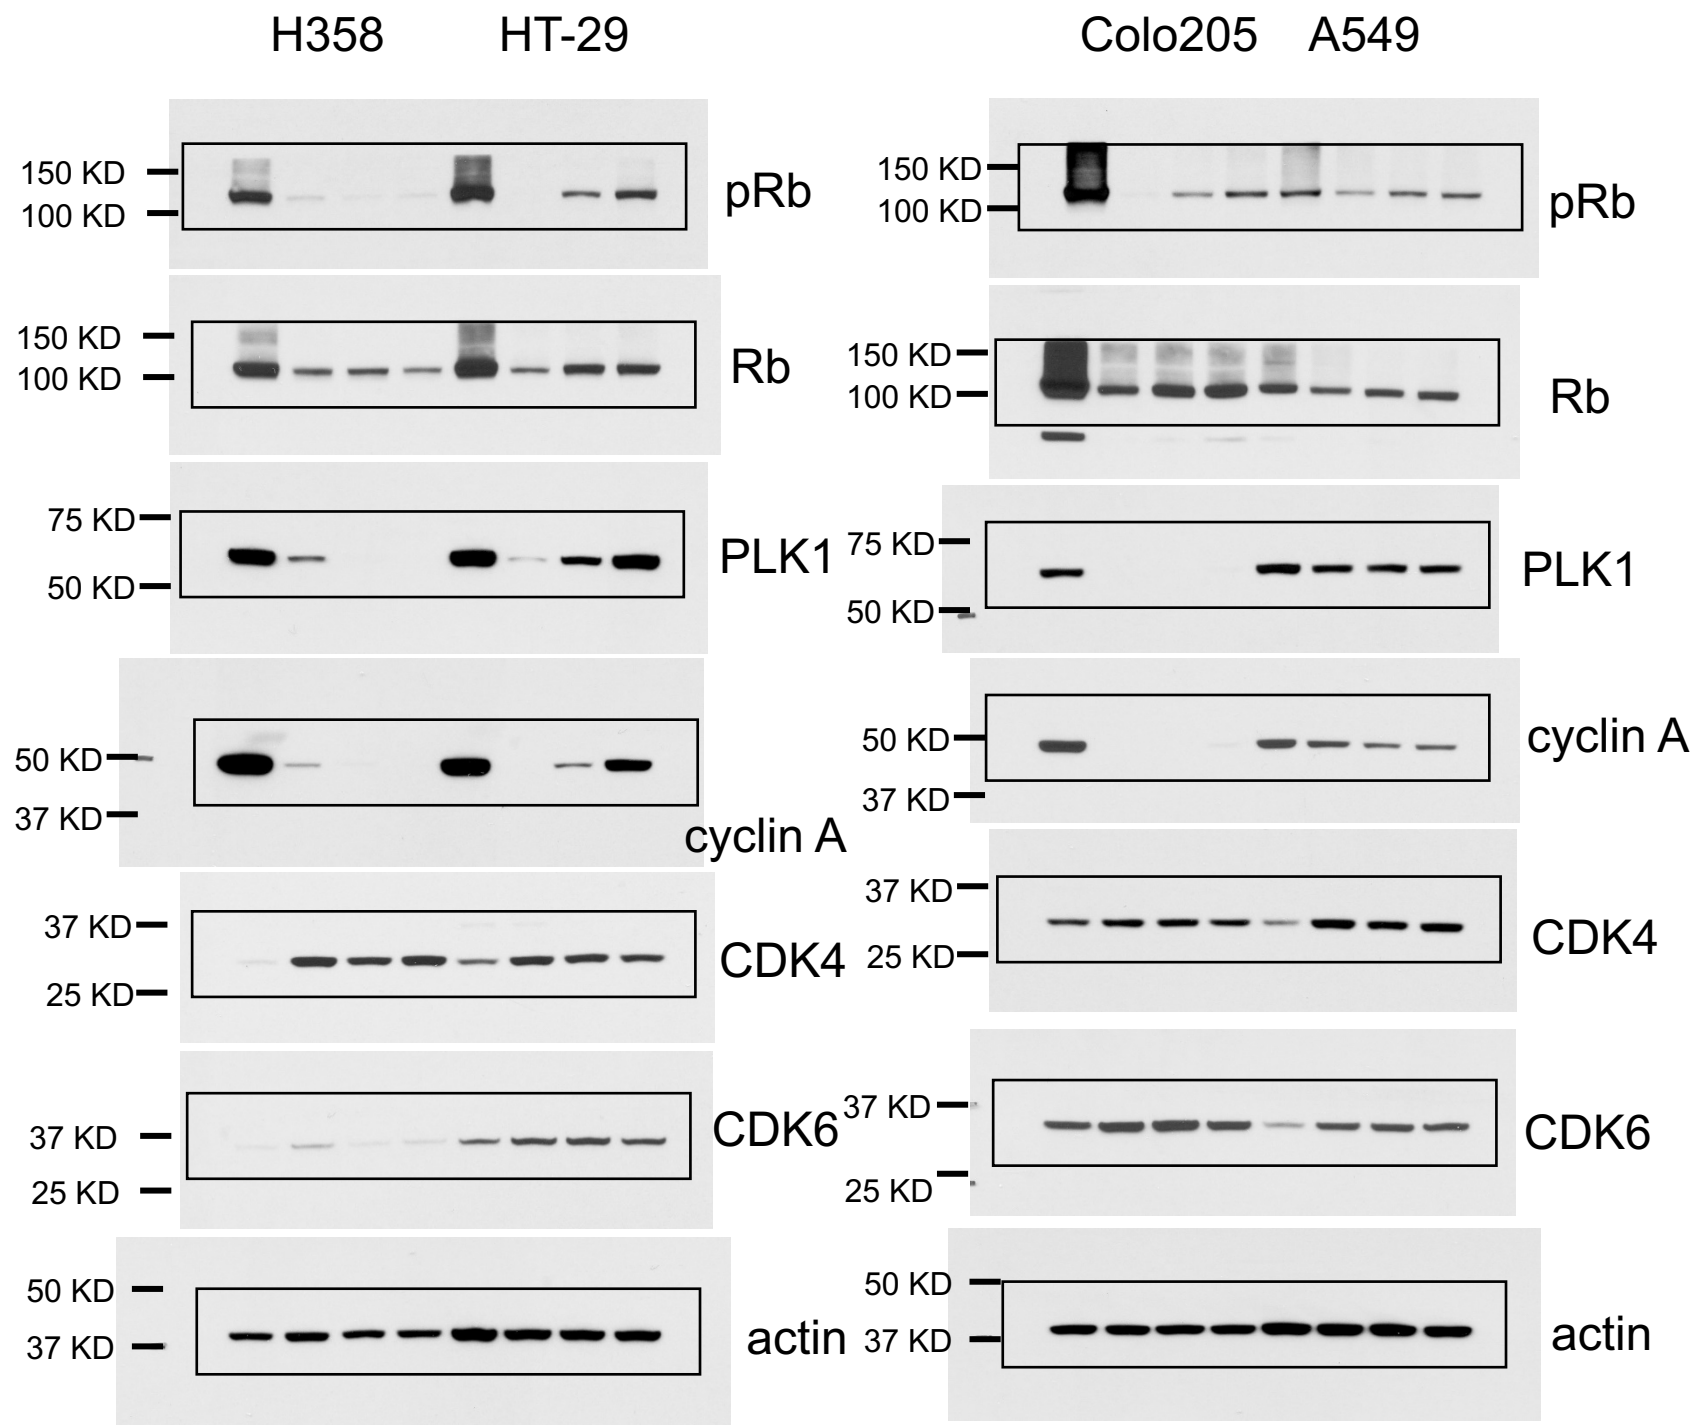

# Figure 1c

MCF7

HCT116

Huh-7

A375

150 KD  
100 KD

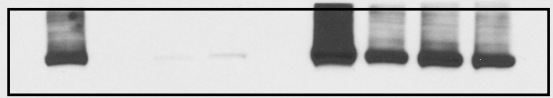

150 KD  
100 KD

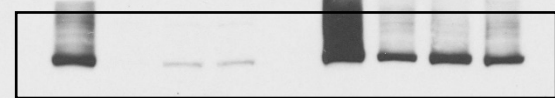

pRb

75 KD  
50 KD

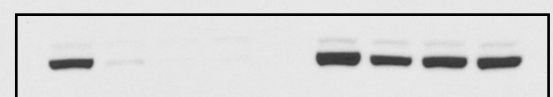

75 KD  
50 KD

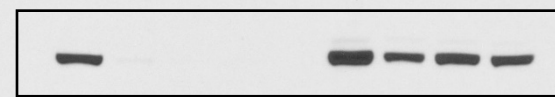

PLK1

50 KD  
37 KD

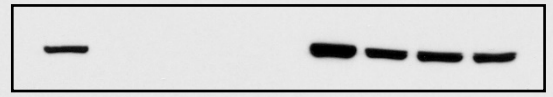

50 KD  
37 KD

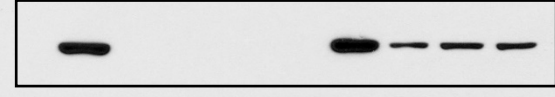

cyclin A

37 KD  
25 KD

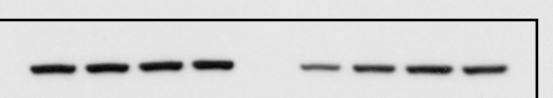

37 KD  
25 KD

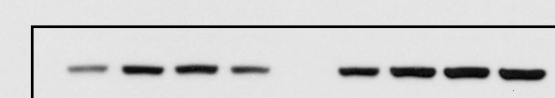

CDK4

37 KD  
25 KD

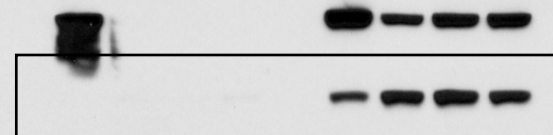

37 KD  
25 KD

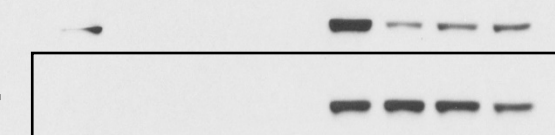

CDK6

MCF7

HCT116

Huh-7

A375

50 KD  
37 KD

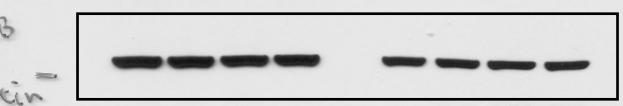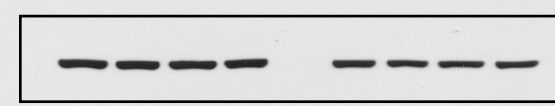

actin

actin

actin

**Figure 1d**

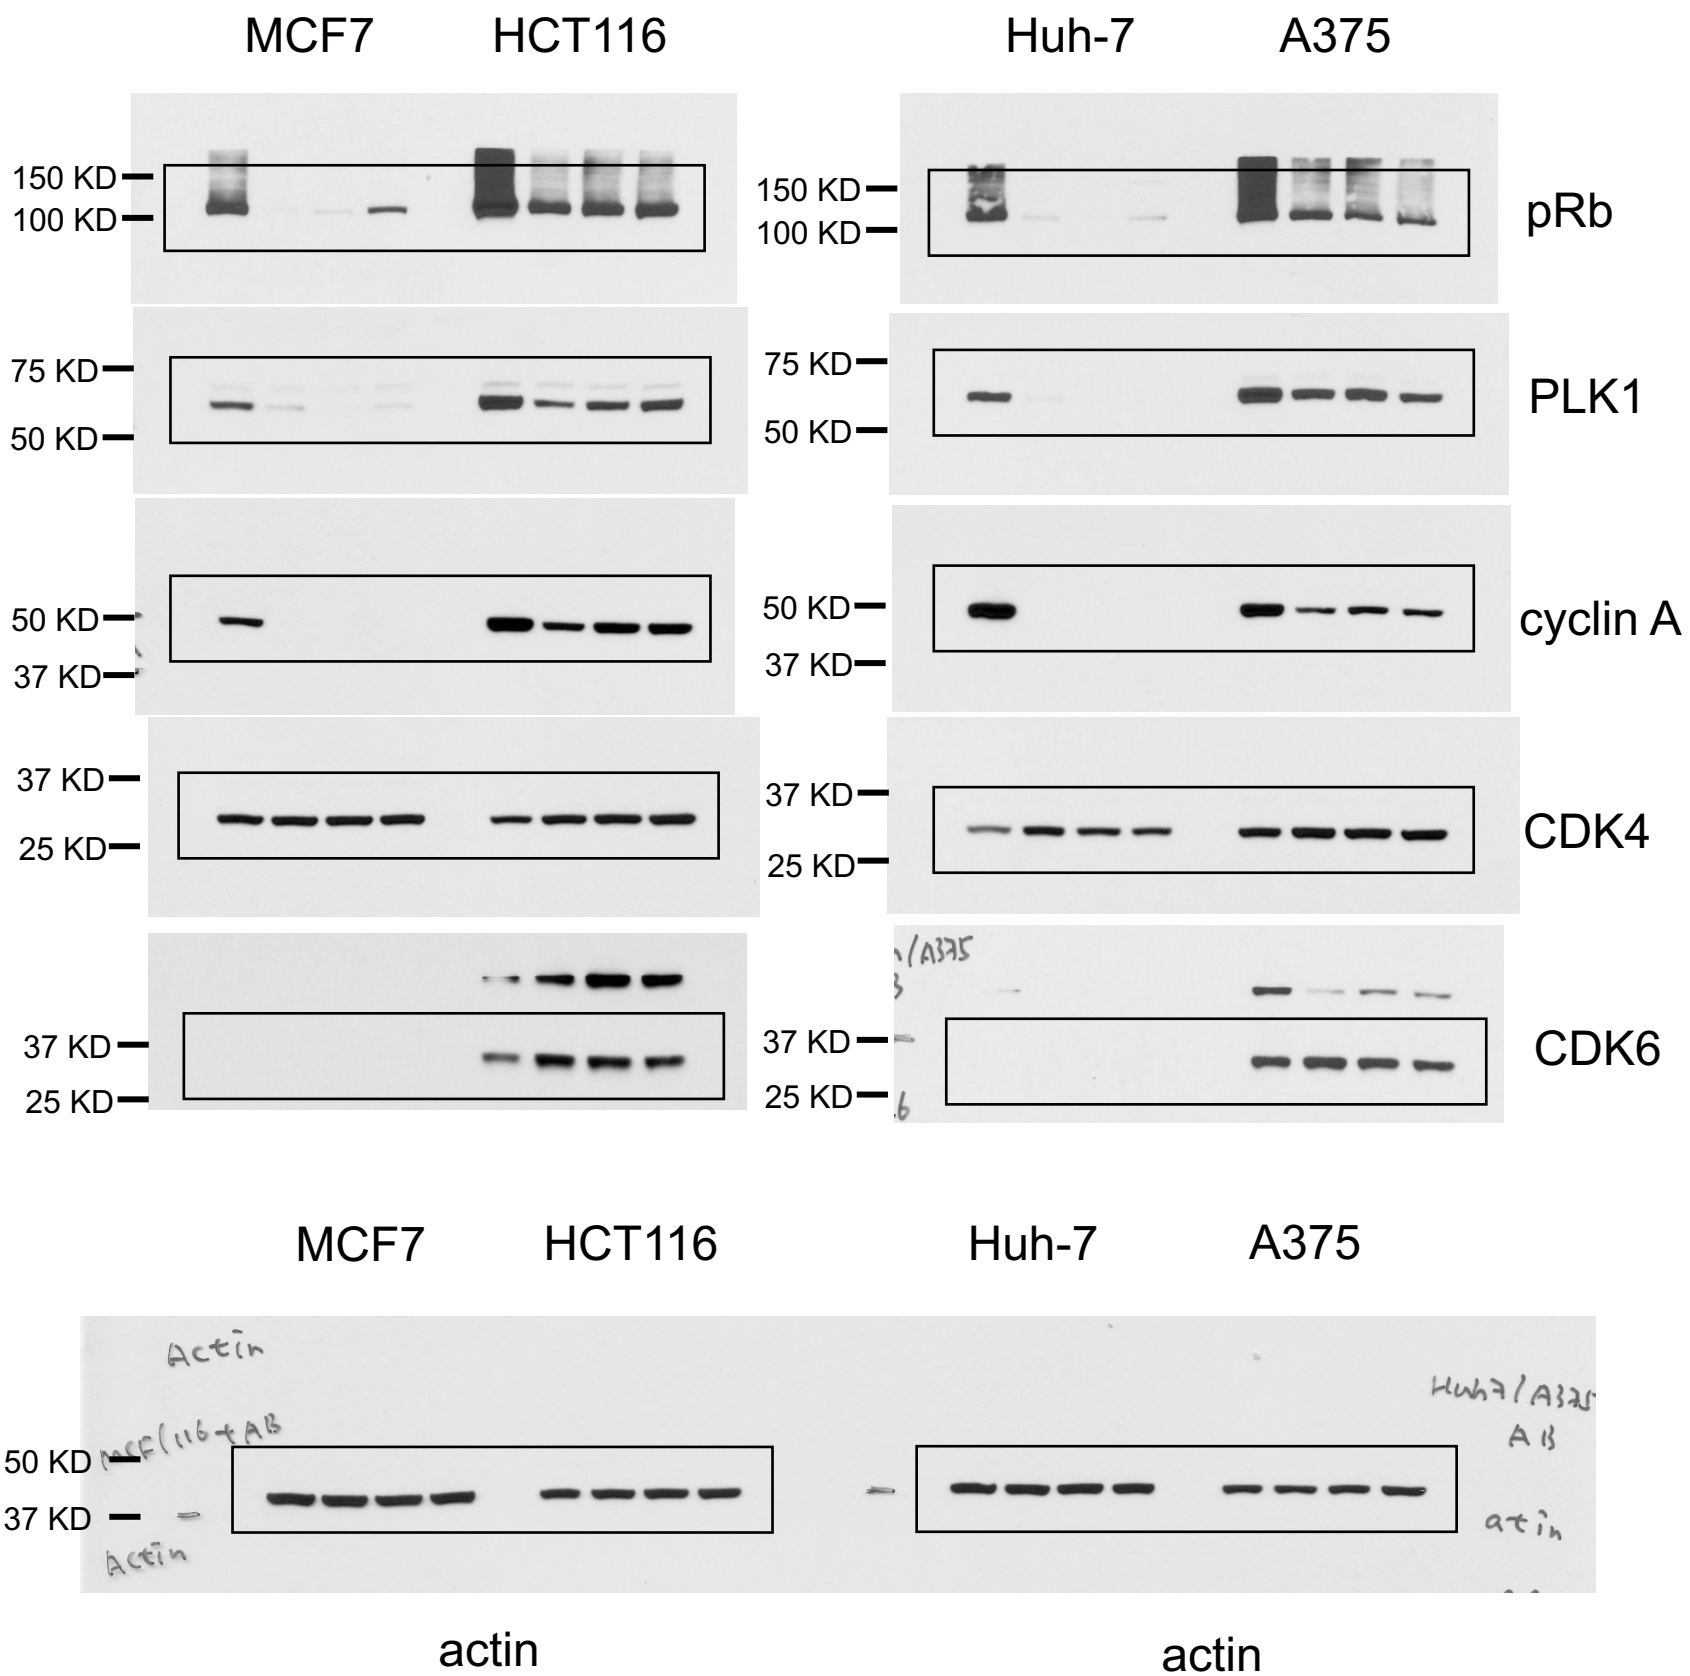

# Figure 1e

Sensitive cell lines

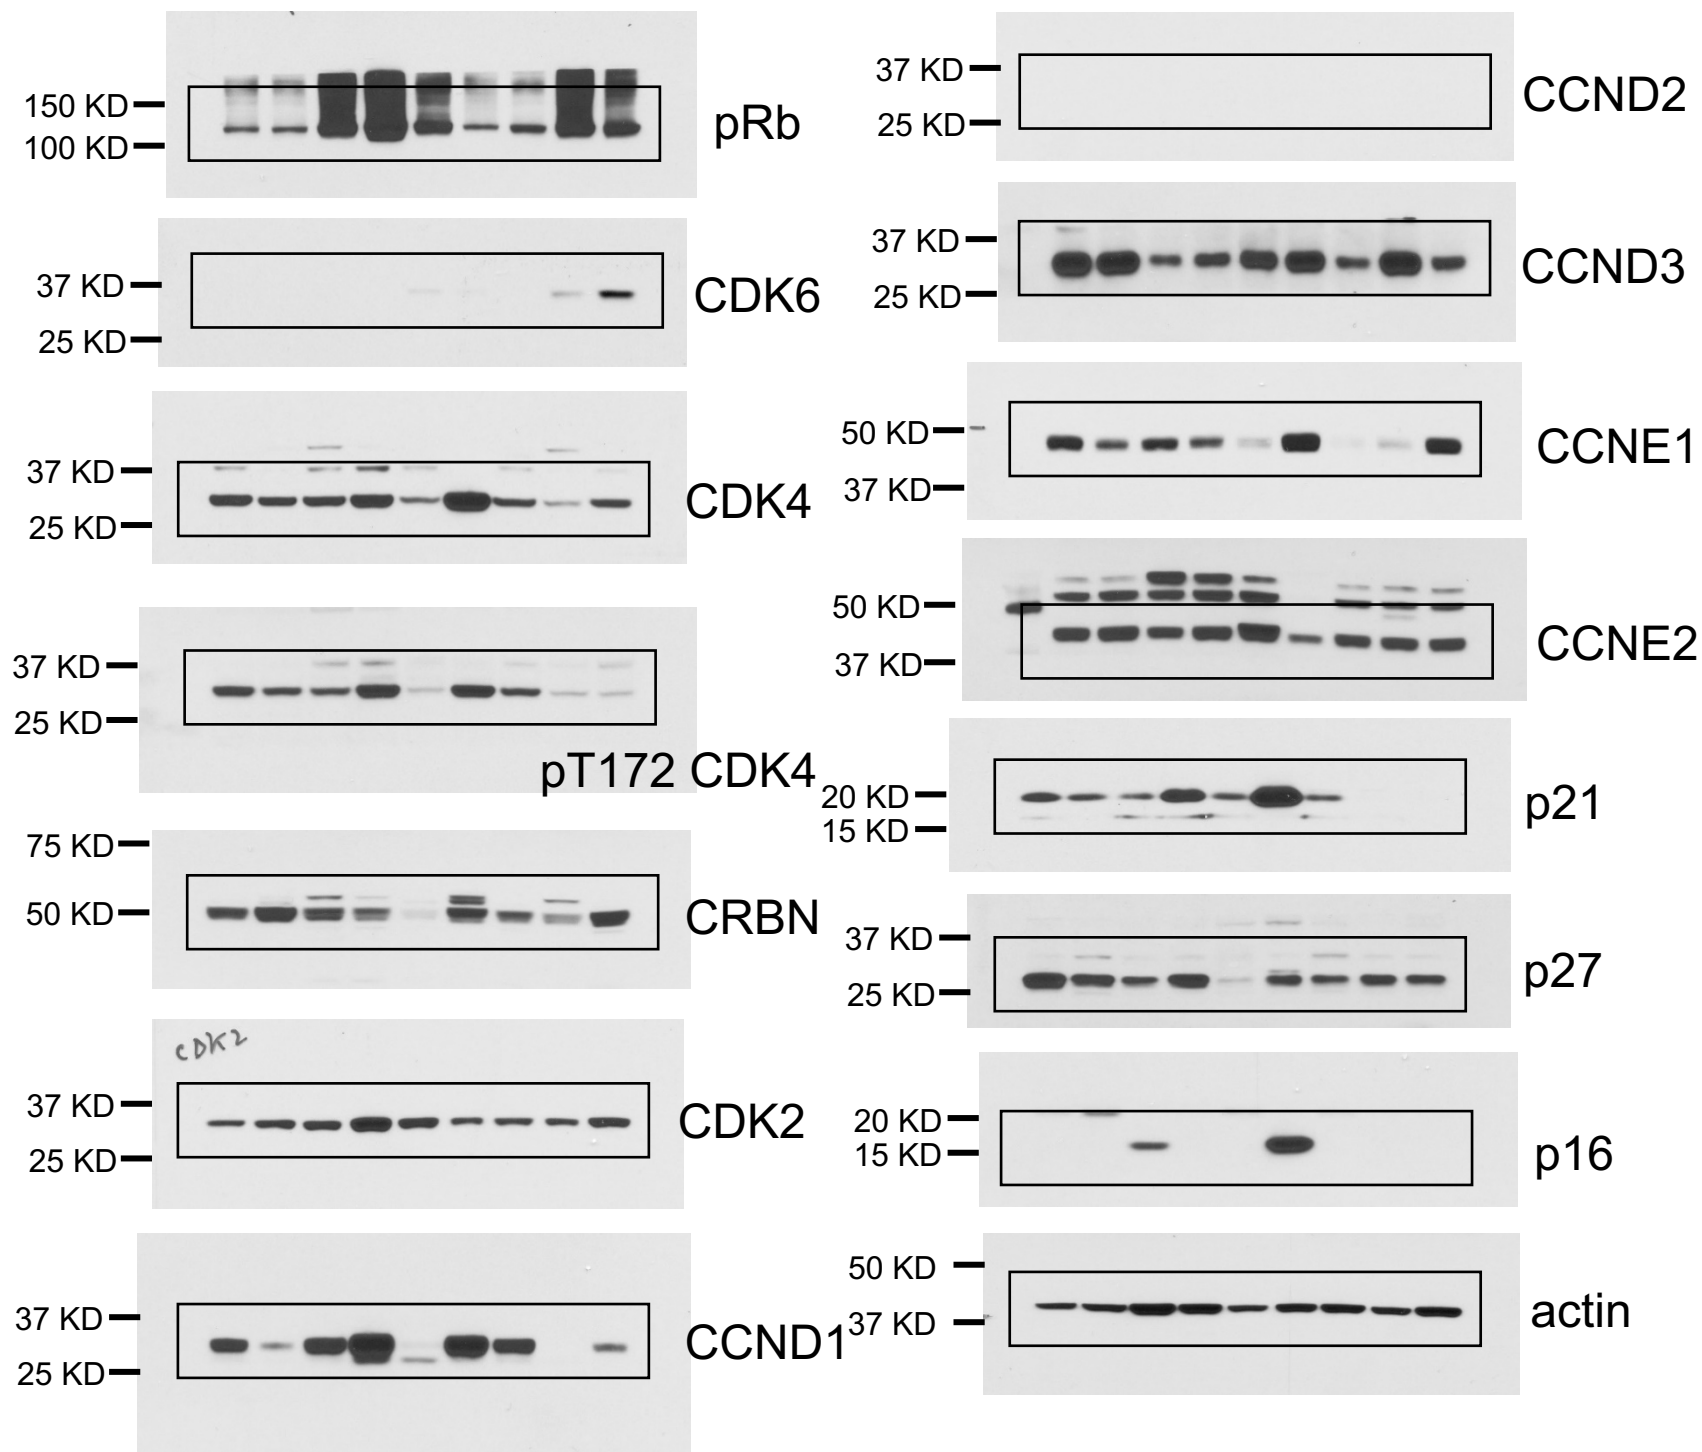

**Figure 1e**

Resistant cell lines

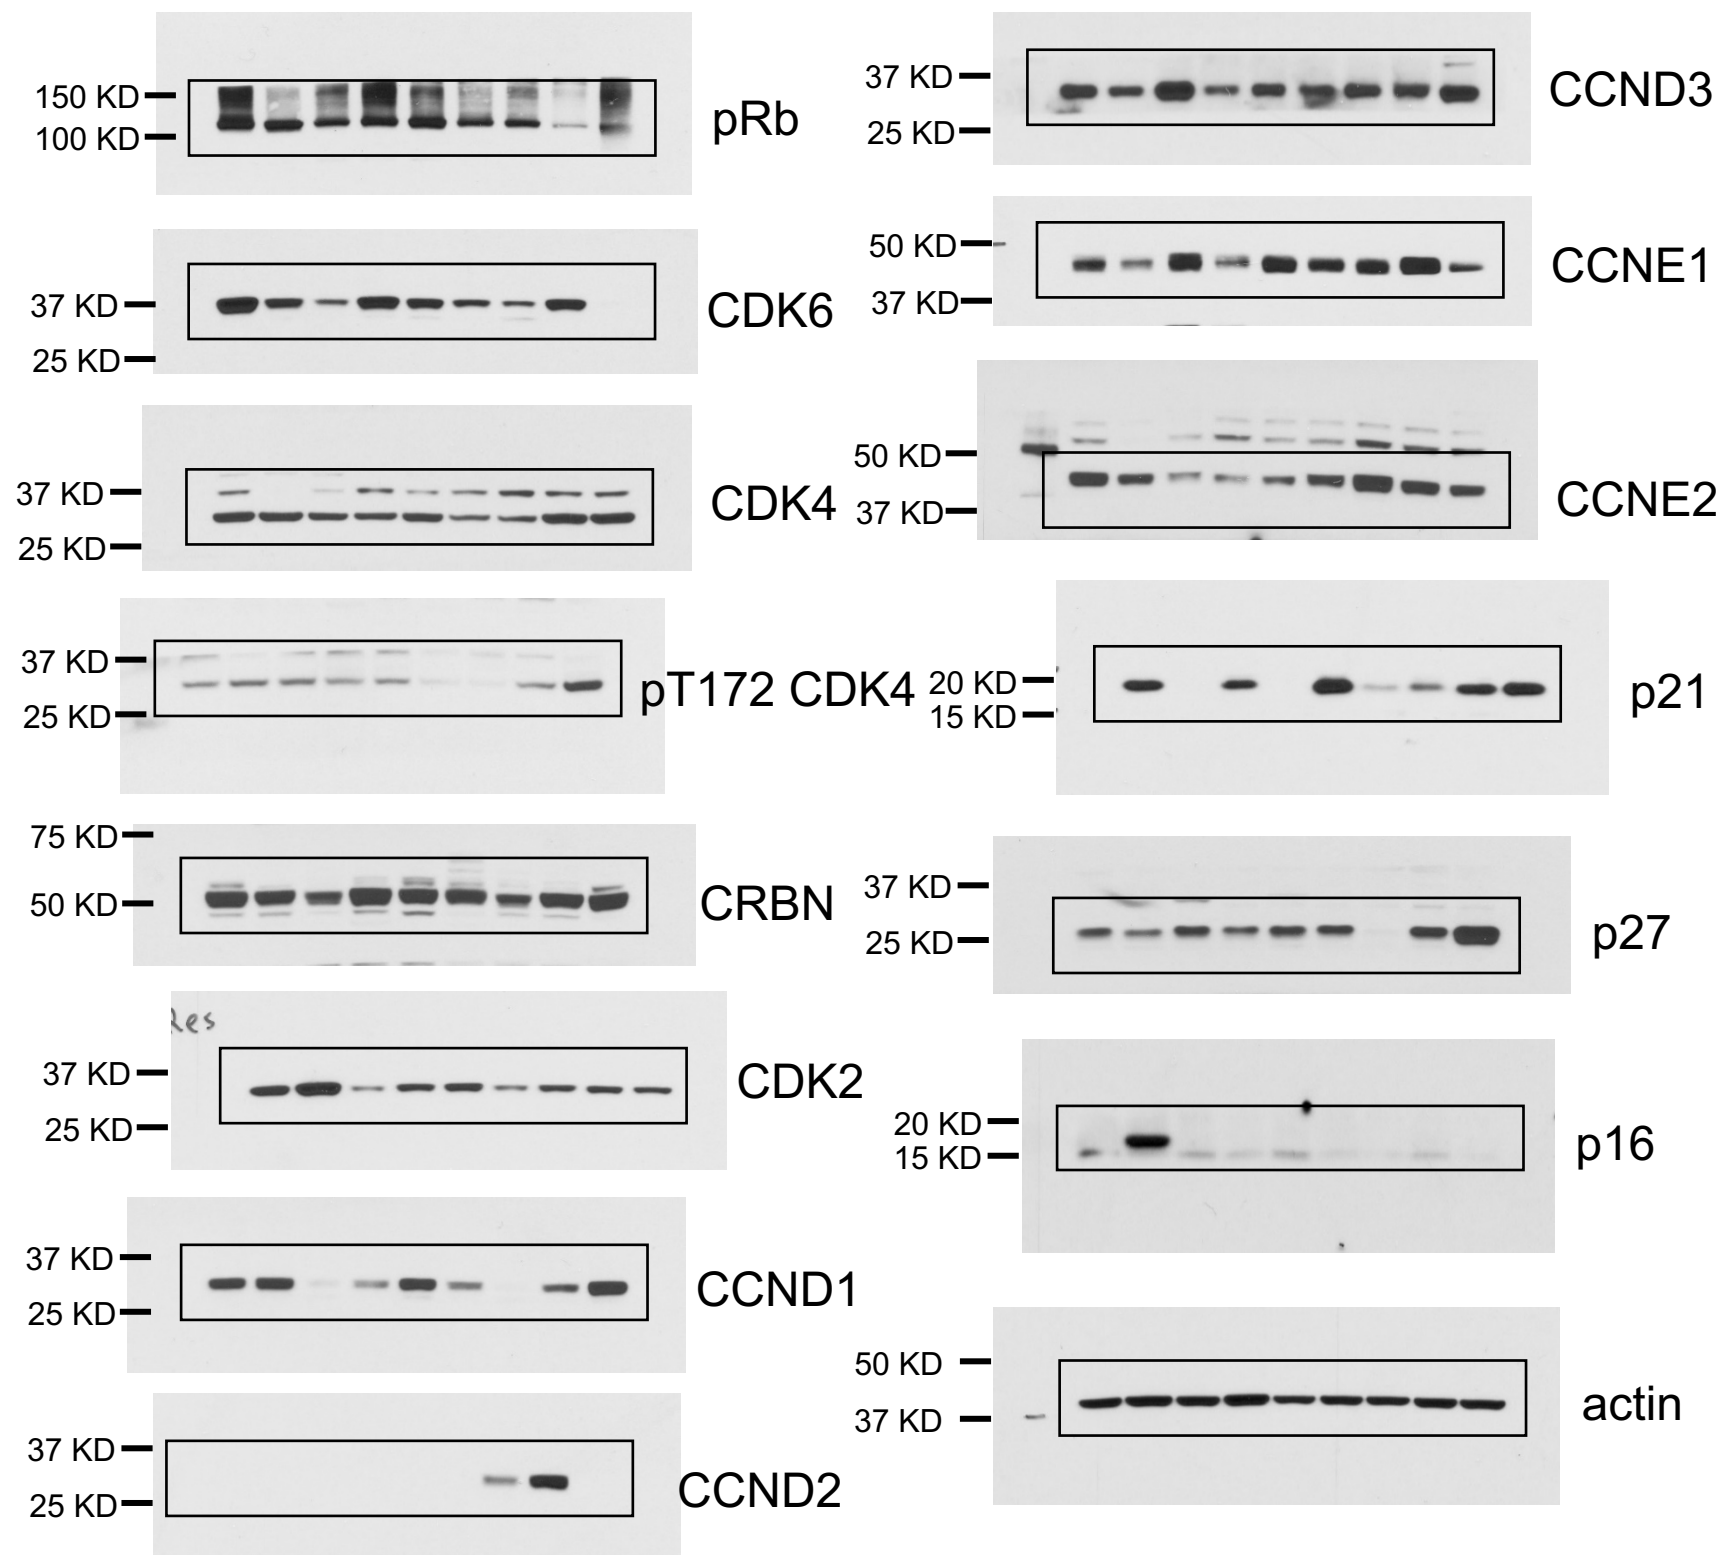

Supplement: NIHMS1684820-supplement-FIG_1__Source_Data_-_Immunoblots.pdf [file NIHMS1684820-supplement-FIG_1__Source_Data_-_Immunoblots.pdf]
