# Supplementary material
Source: PubMed Central journal article supplement (PMC8462800)

# Figure 3a

## A549-shCDK6

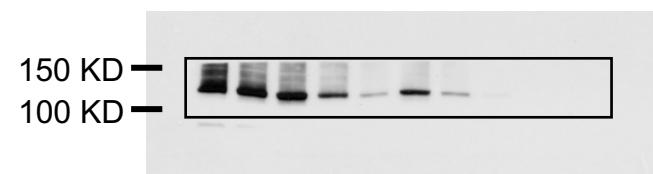

pRb

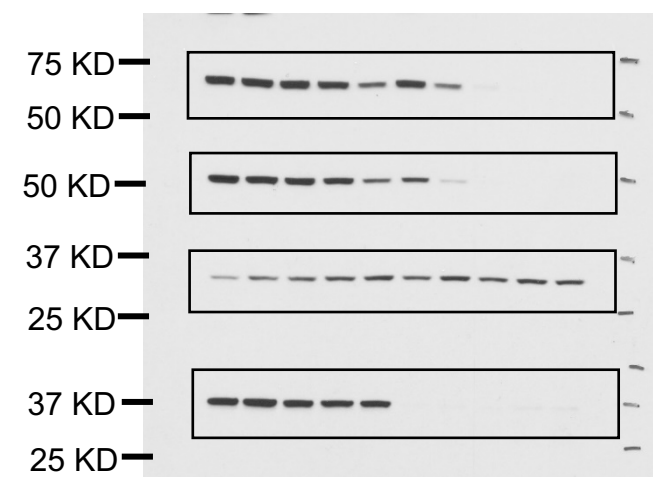

PLK1

cyclin A

CDK4

CDK6

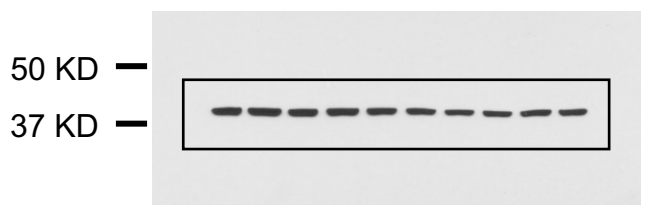

actin

## A375-shCDK6

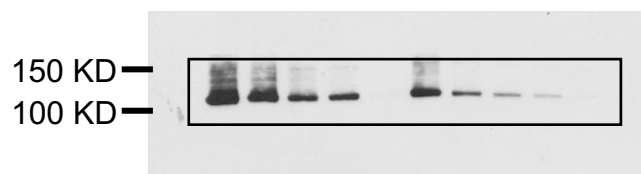

pRb

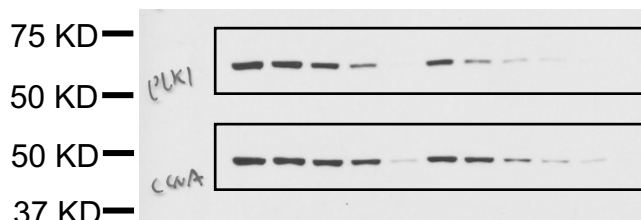

PLK1

cyclin A

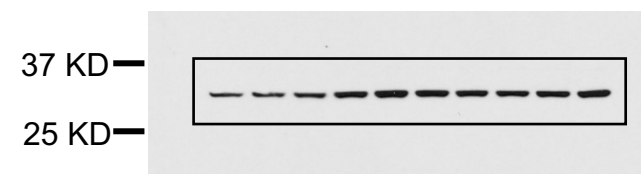

CDK4

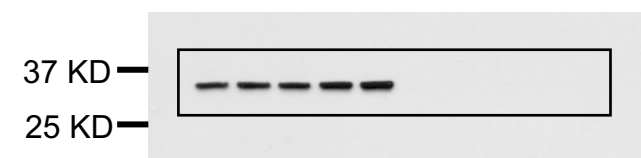

CDK6

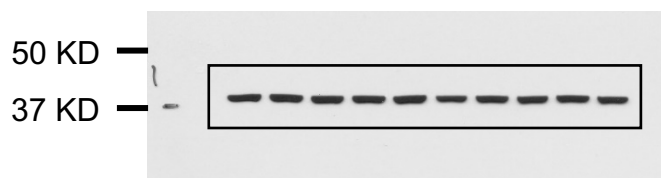

actin

# Figure 3a

A549-shCDK4

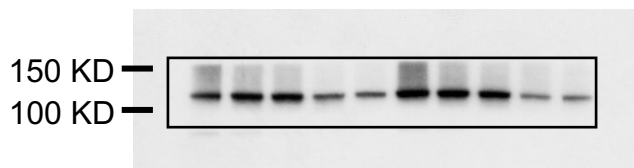

pRb

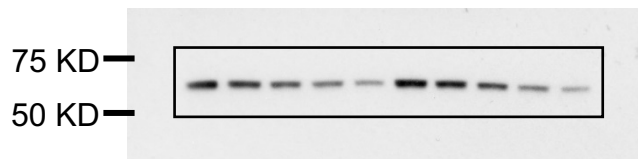

PLK1

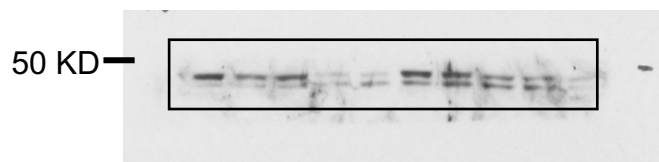

cyclin A

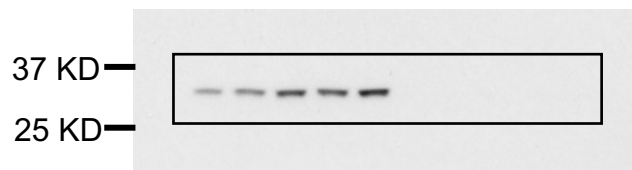

CDK4

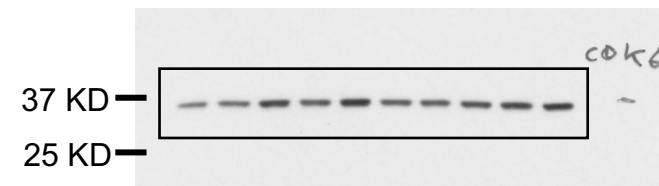

CDK6

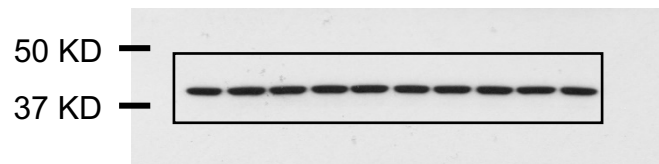

actin

A375-shCDK4

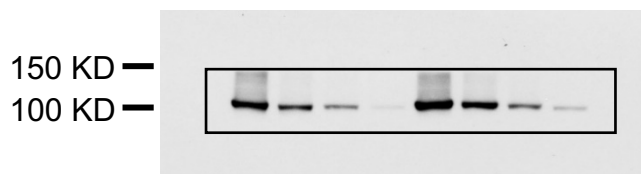

pRb

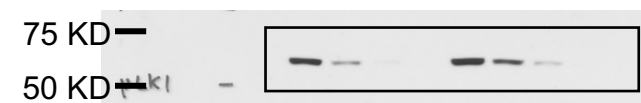

PLK1

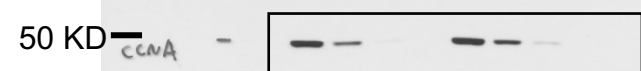

cyclin A

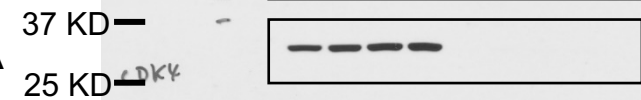

CDK4

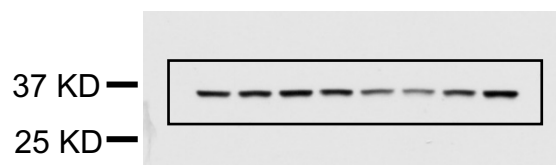

CDK6

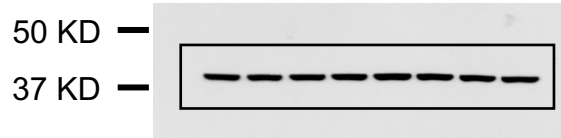

actin

**Figure 3c**

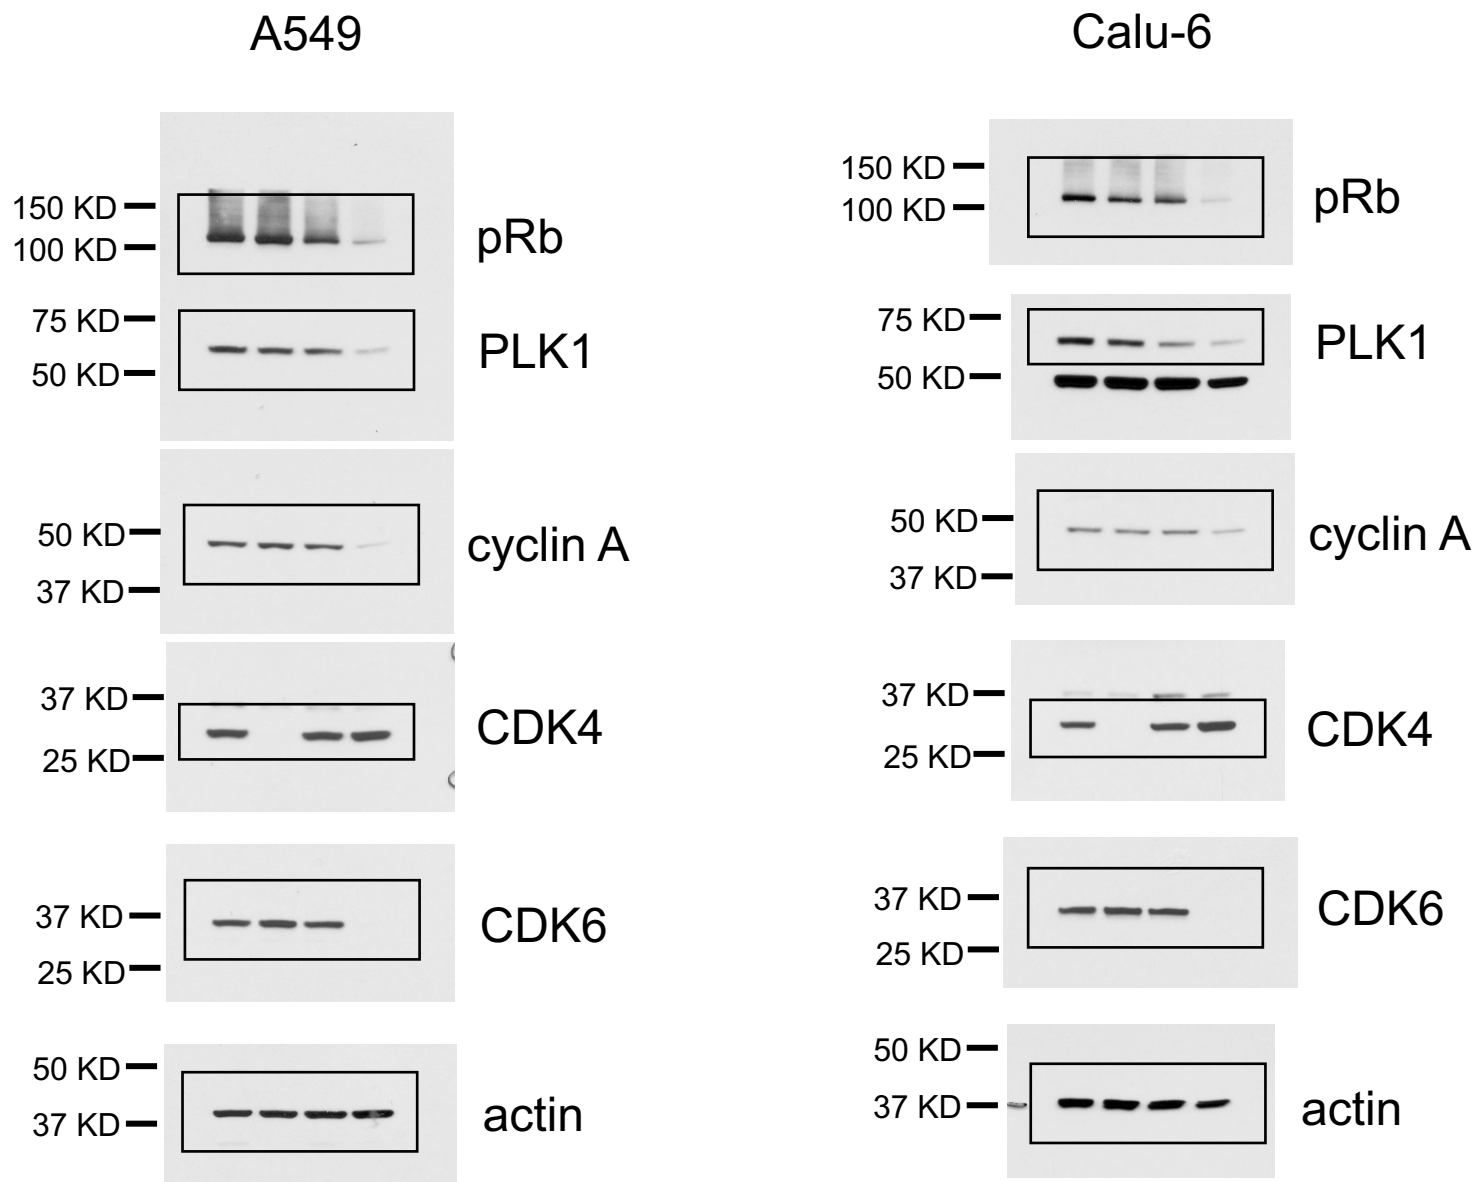

**Figure 3c**

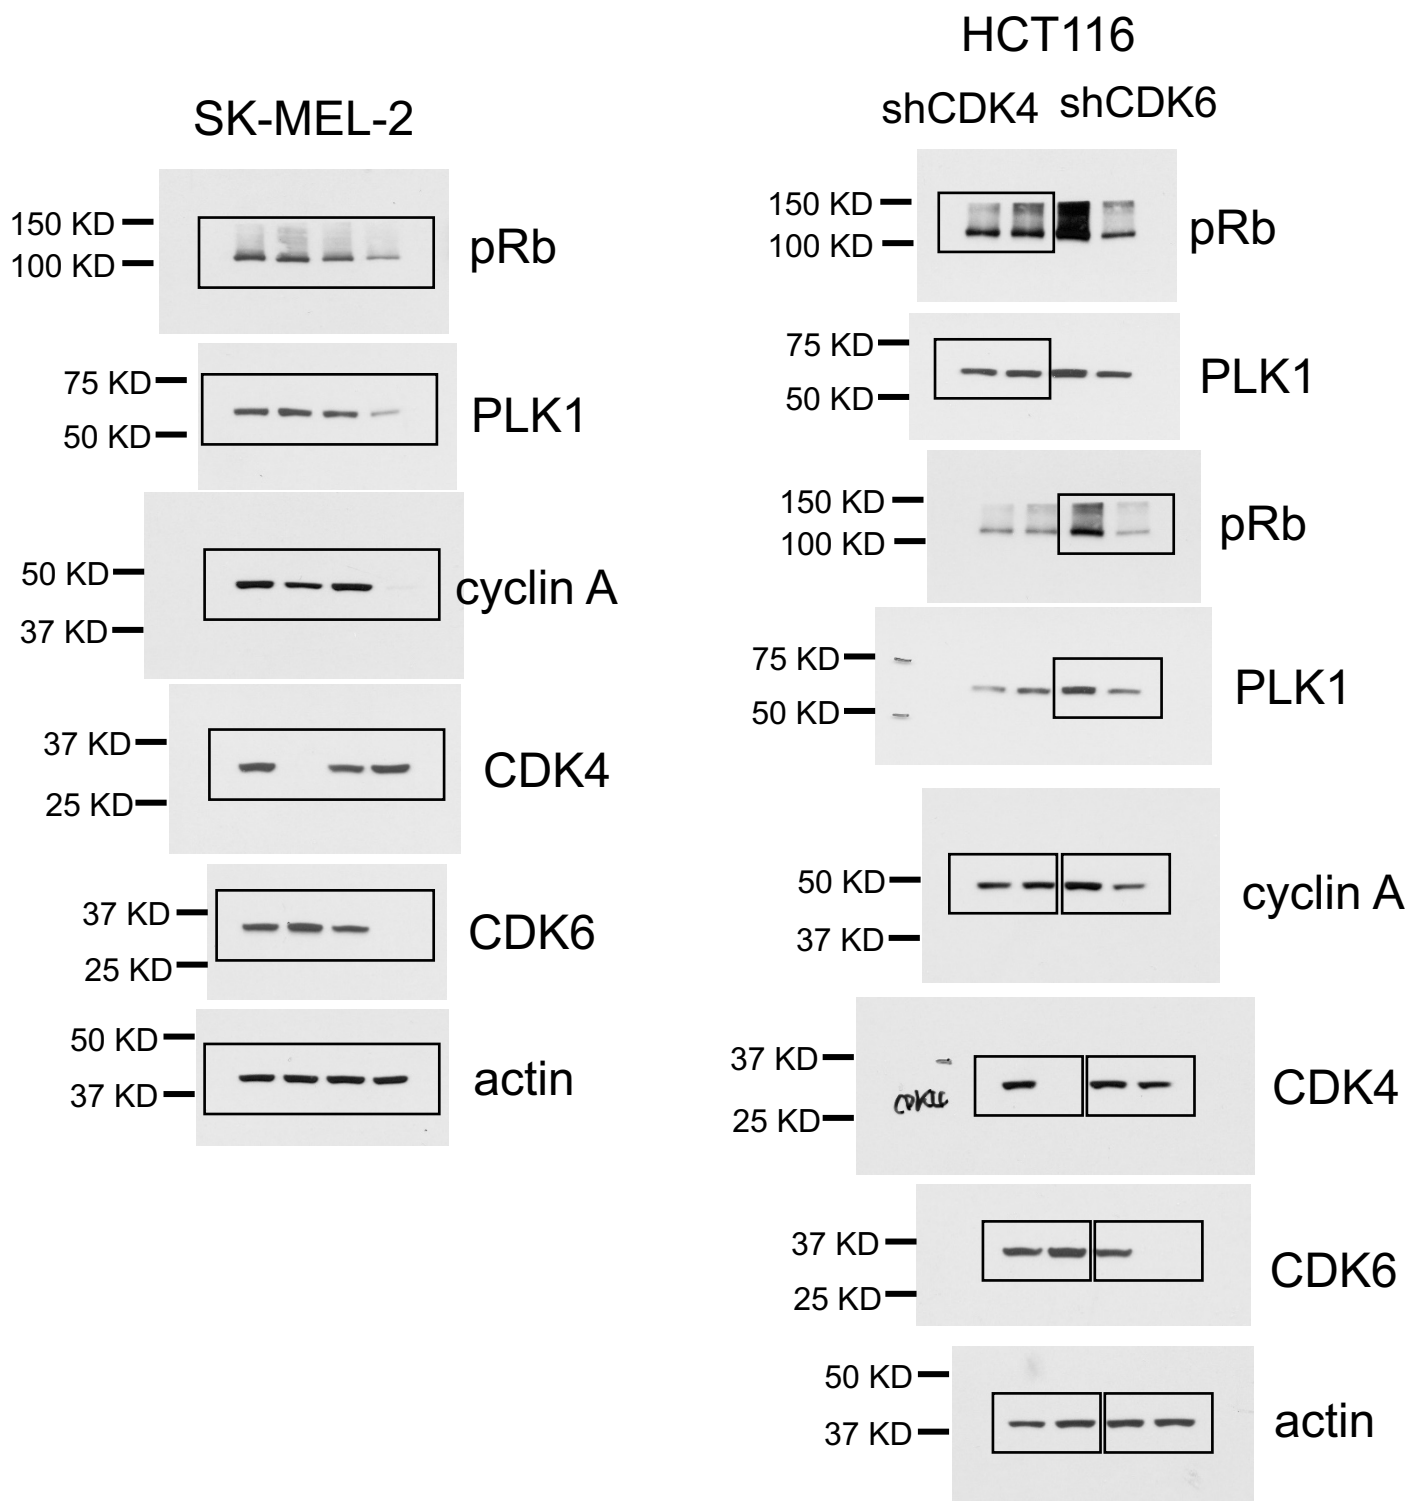

# Figure 3d

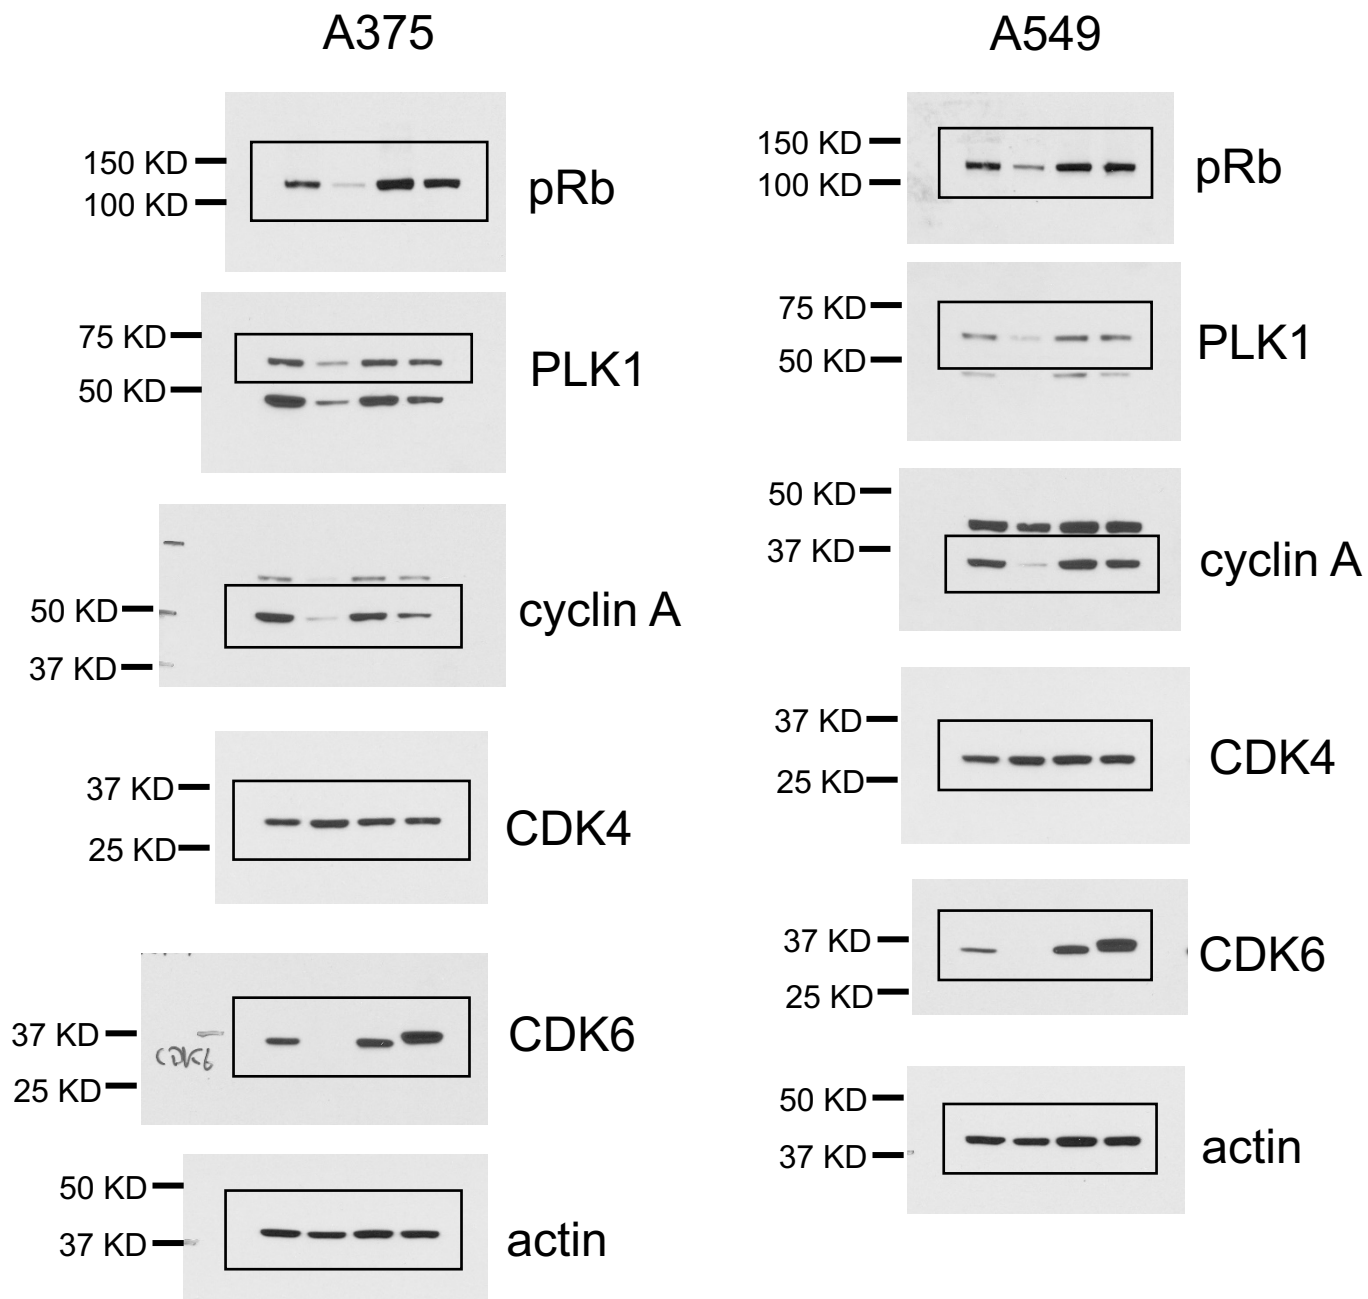

# Figure 3d

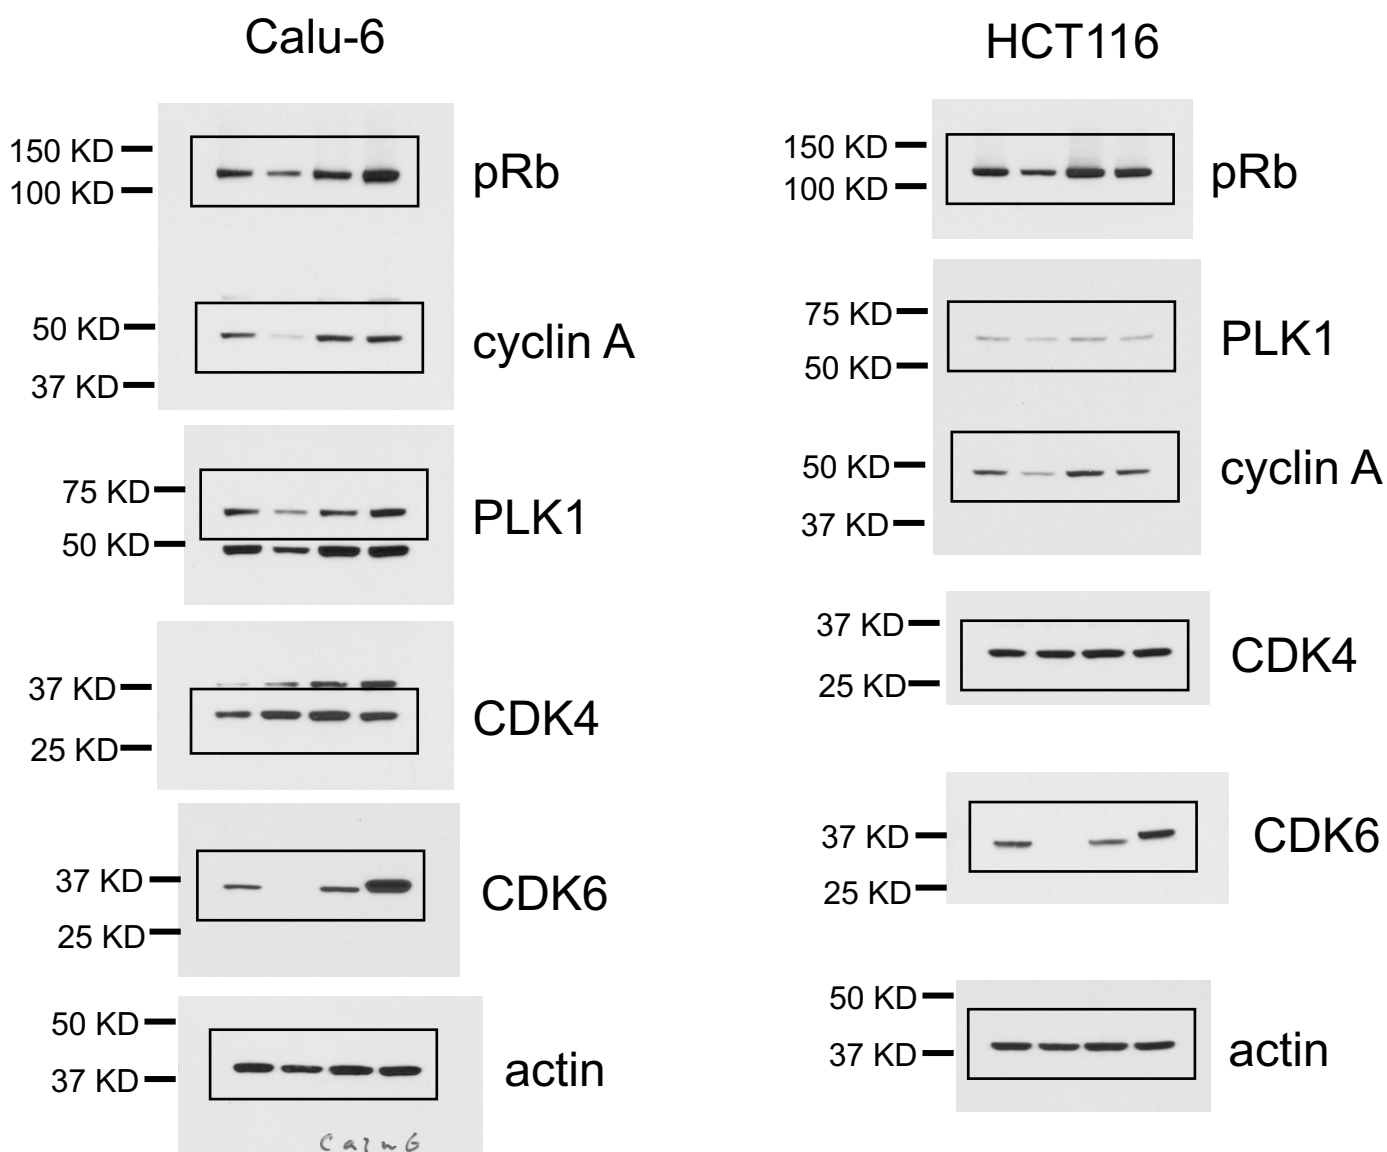

Supplement: NIHMS1684820-supplement-FIG_3__Source_Data_-_Immunoblots.pdf [file NIHMS1684820-supplement-FIG_3__Source_Data_-_Immunoblots.pdf]
