# Supplementary material
Source: PubMed Central journal article supplement (PMC8462800)

# Figure 5b and 5c

## 5b

Colo205

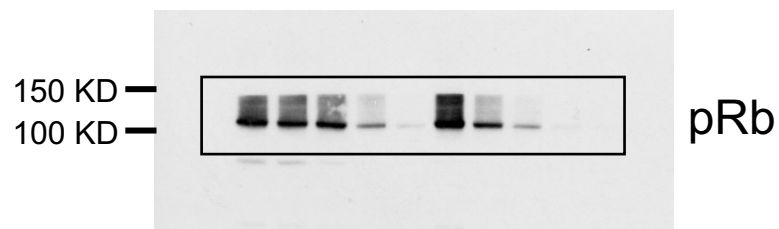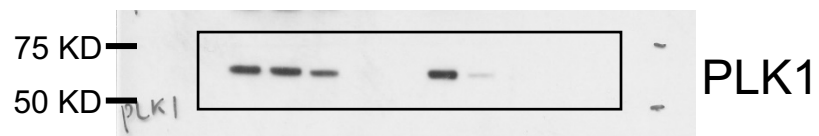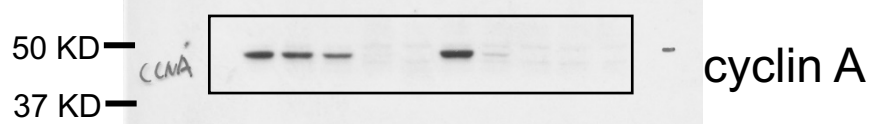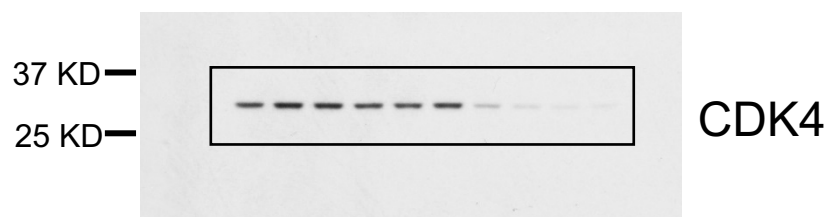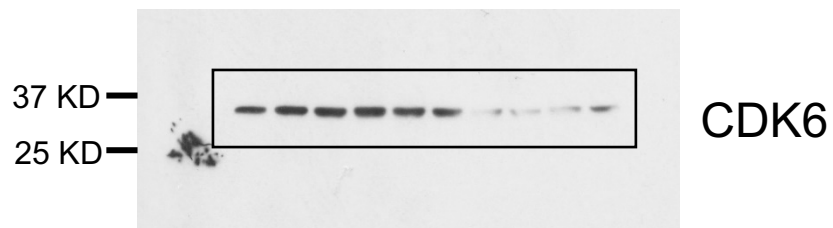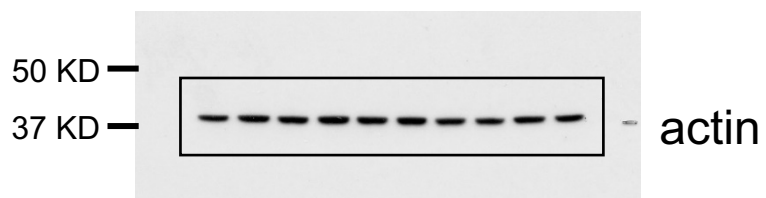

## 5c

TC-71

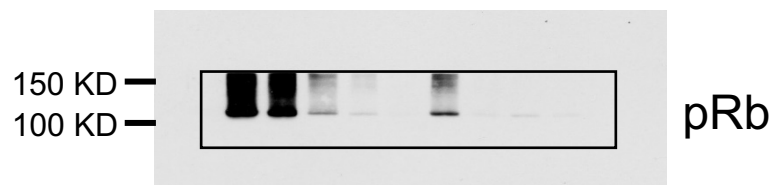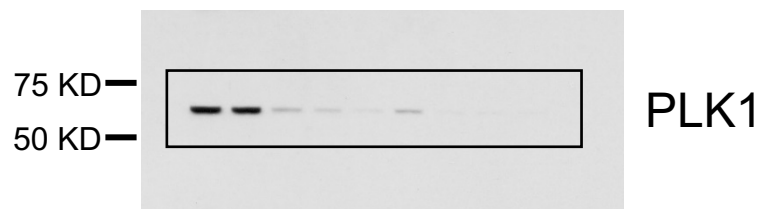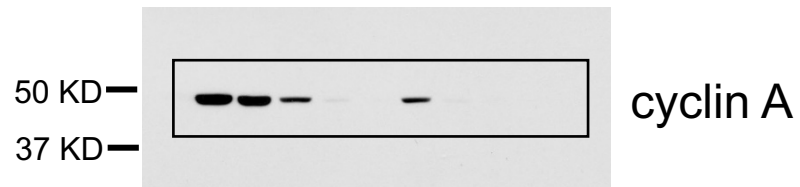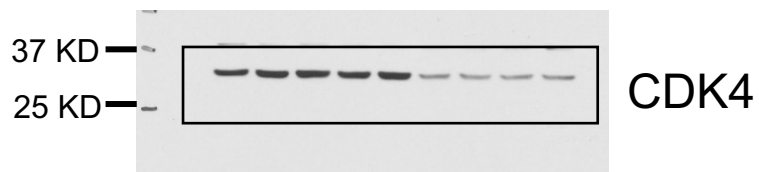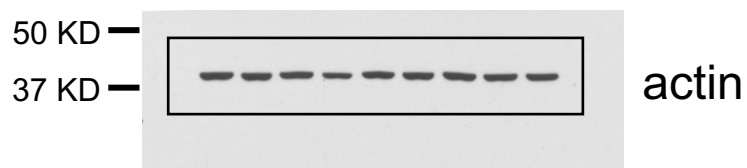

# Figure 5c

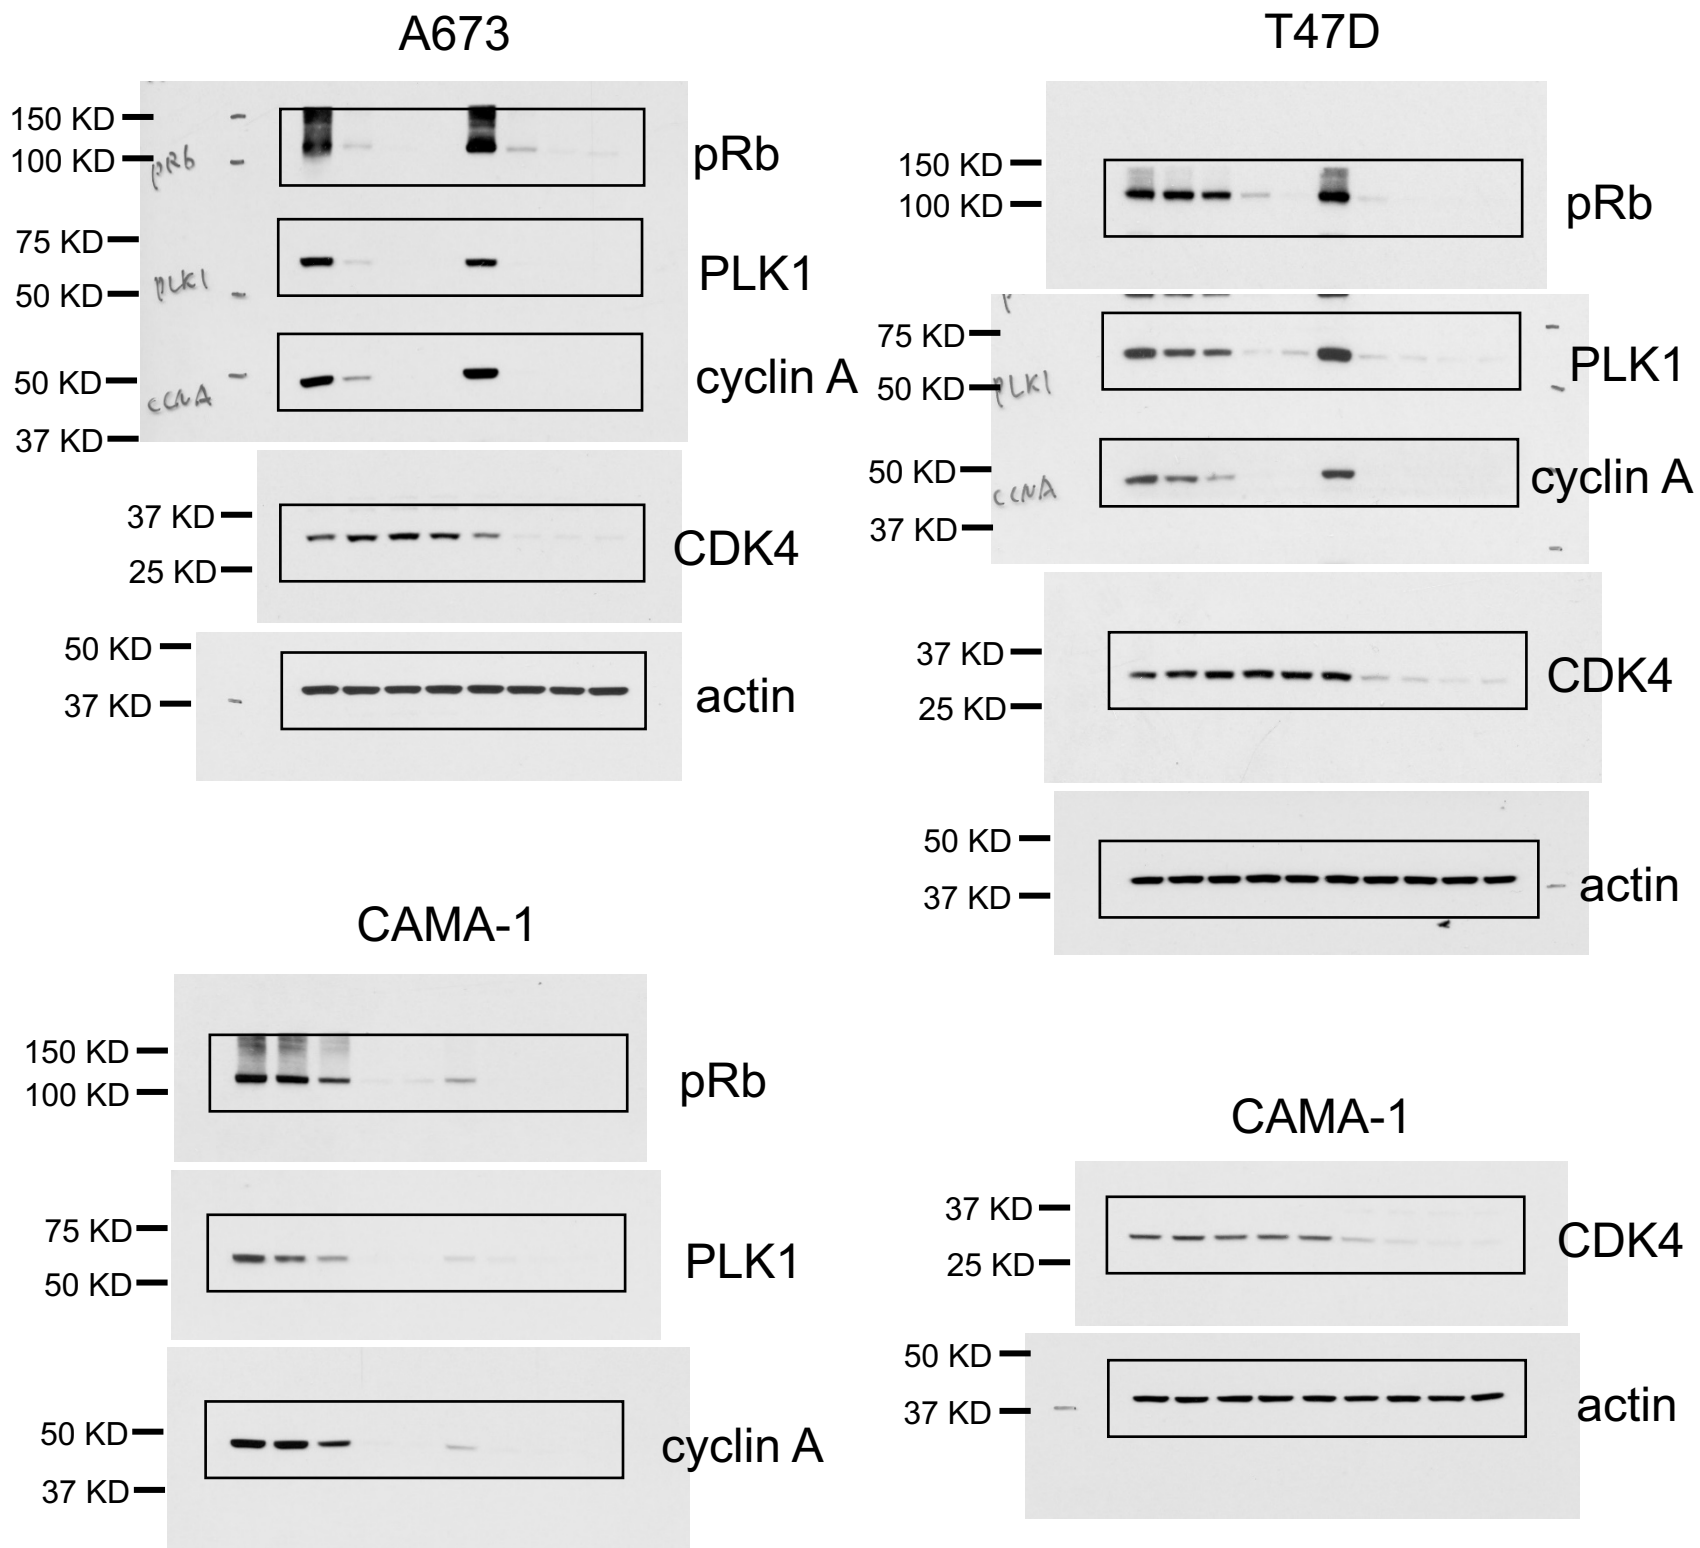

**Fig 5d**

U87MG

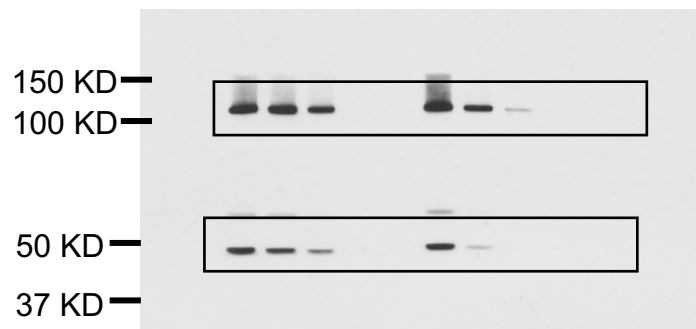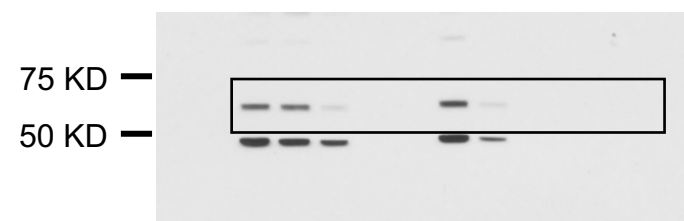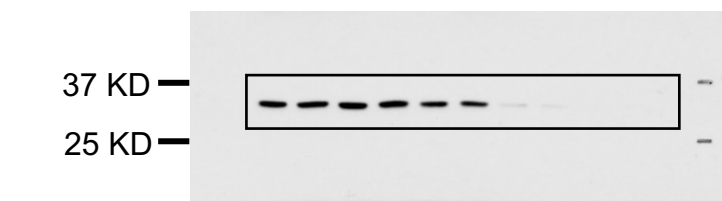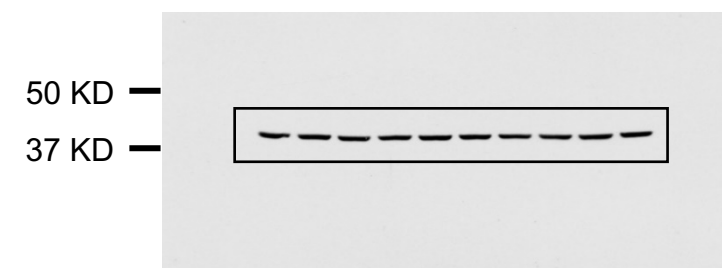

MCF7

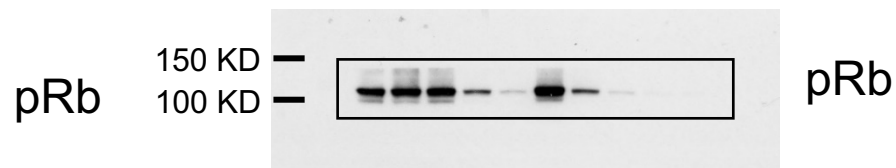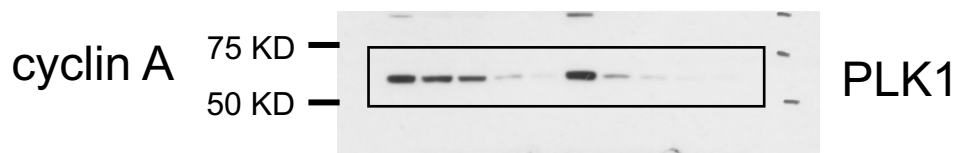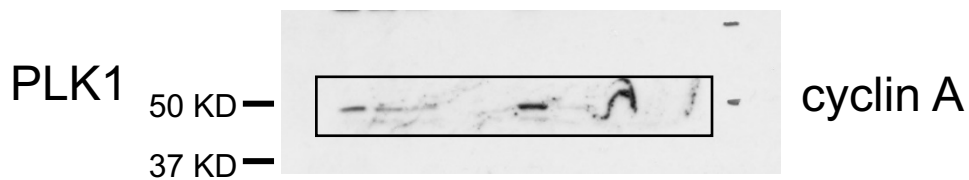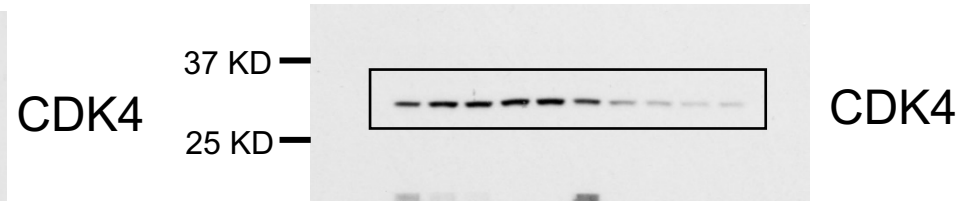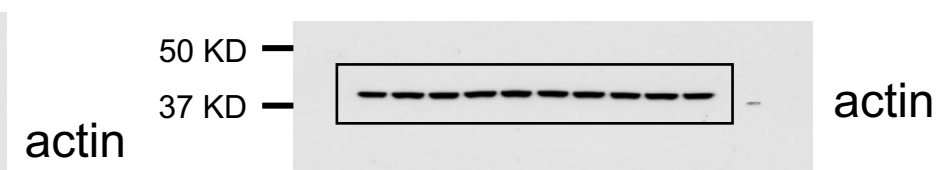

**Fig 5e**

H358

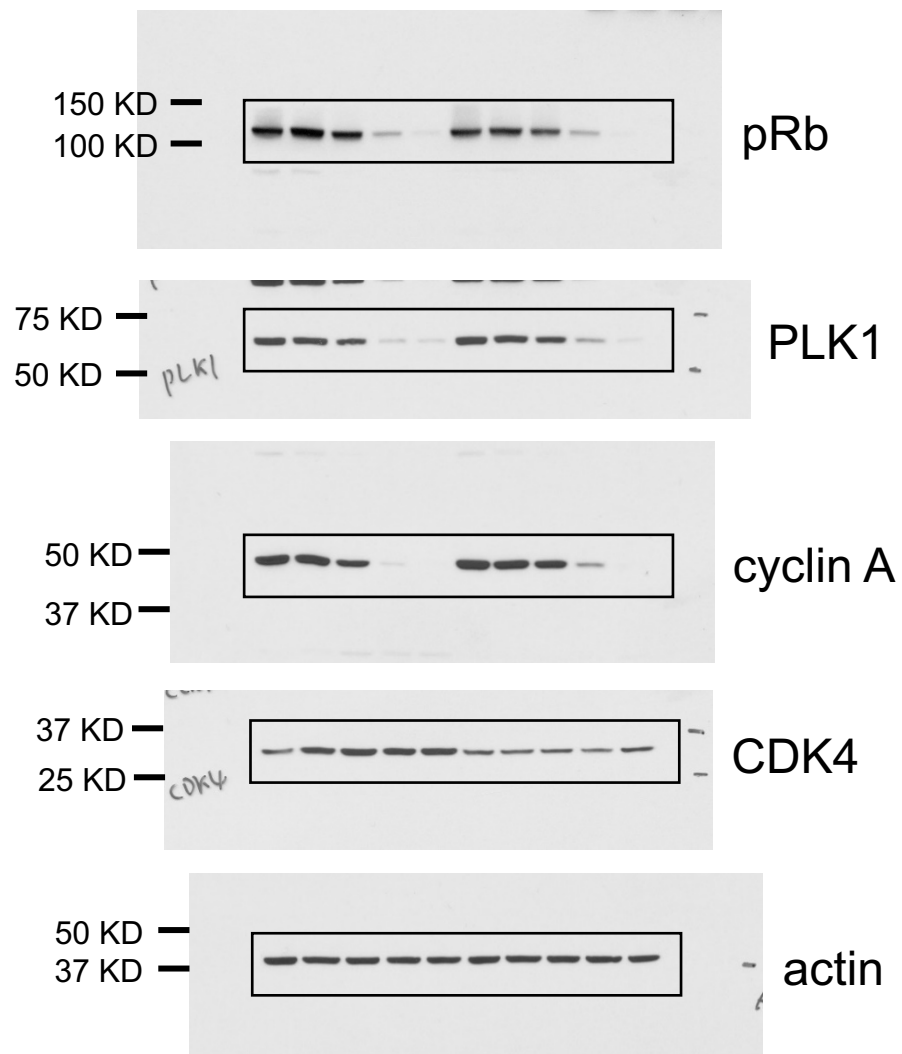

**Fig 5g**

Granta 519

JeKo-1

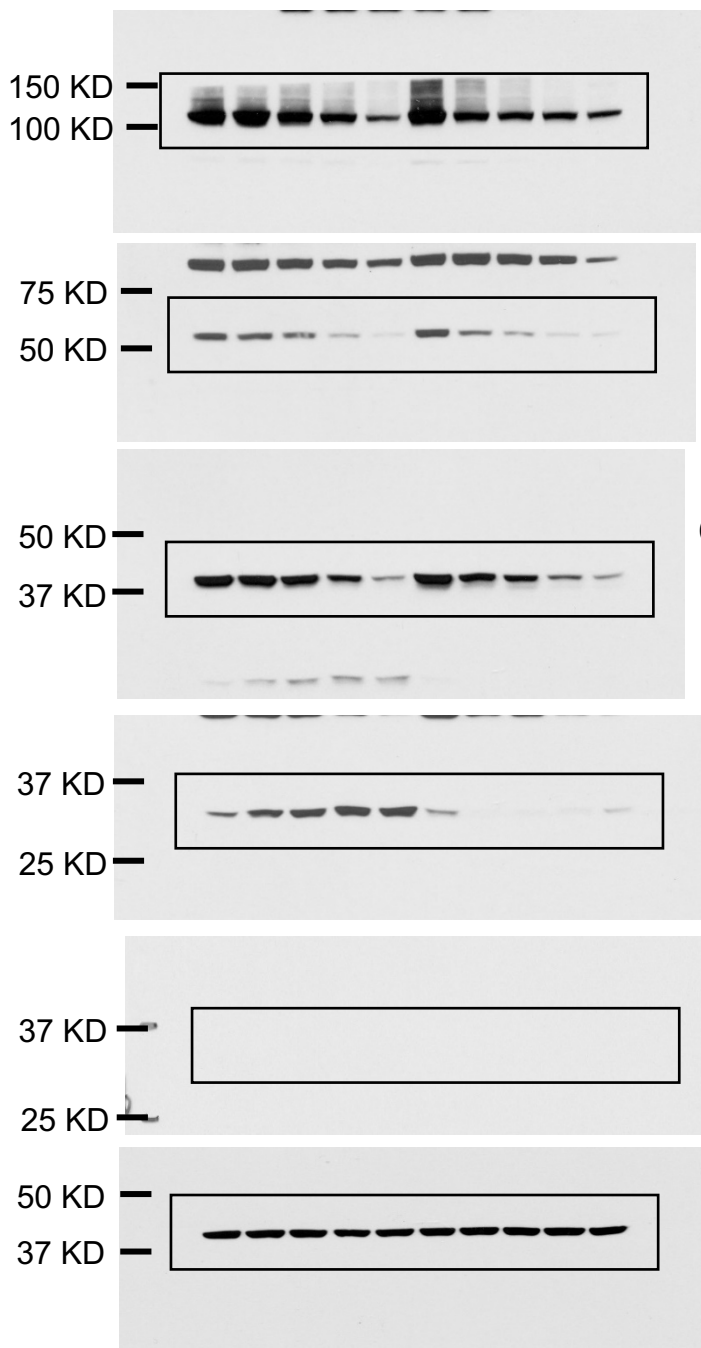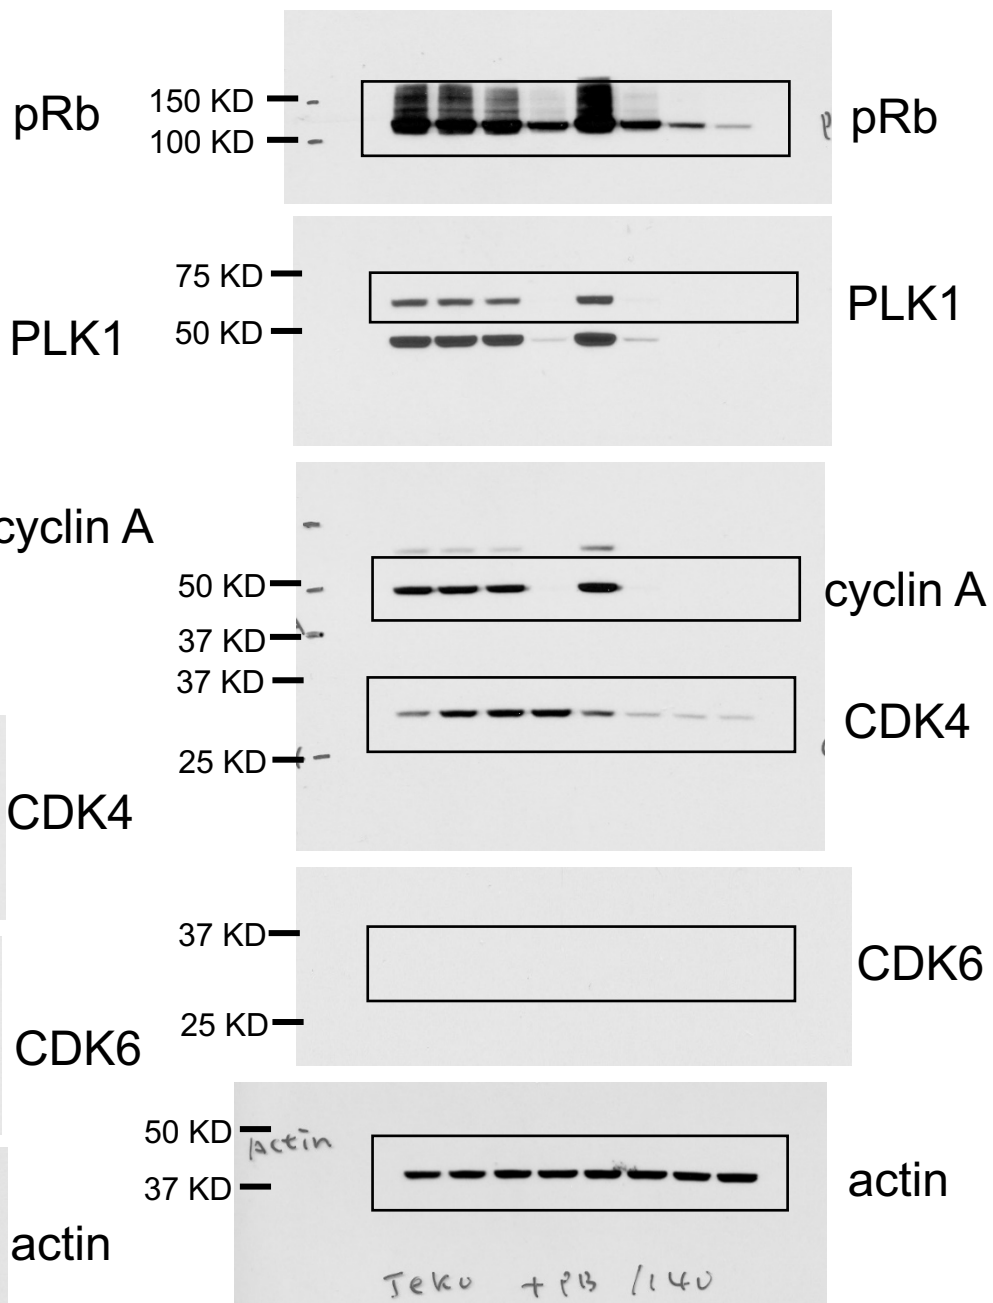

**Fig 5g**

Mino

Z138

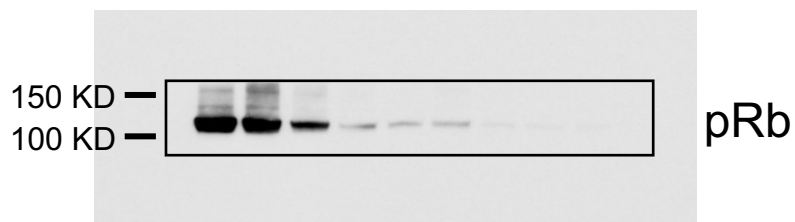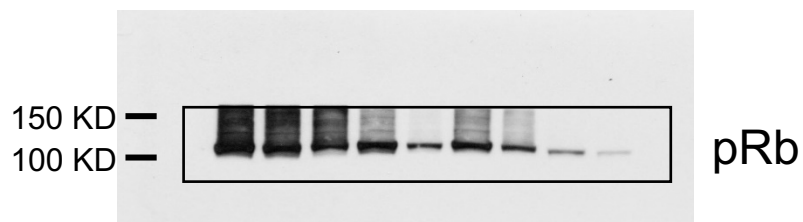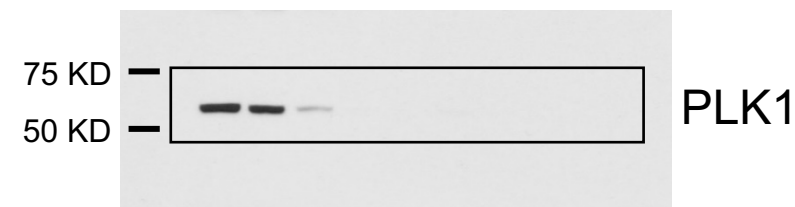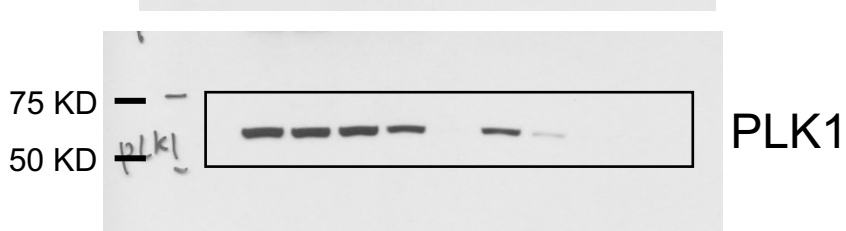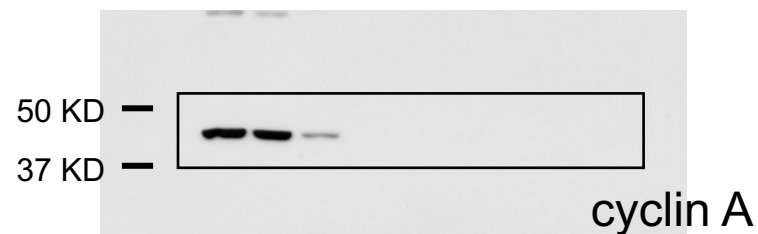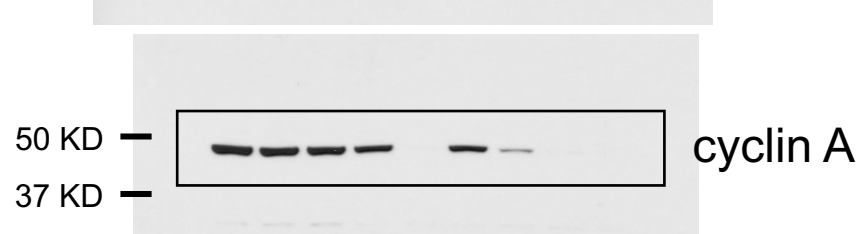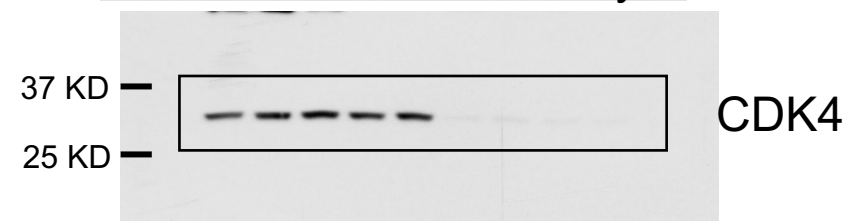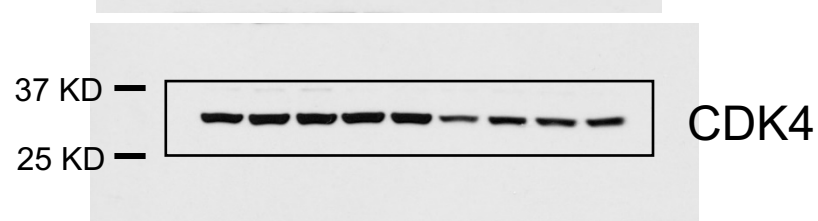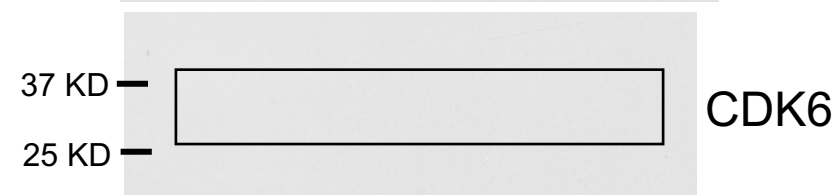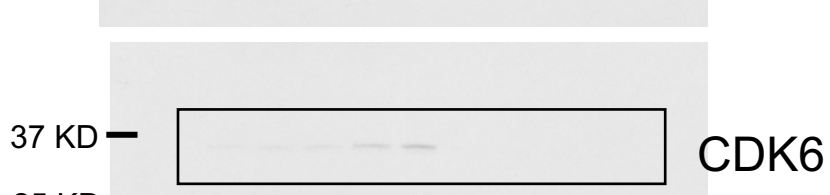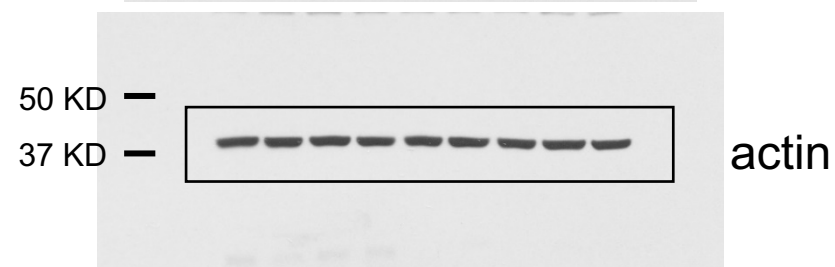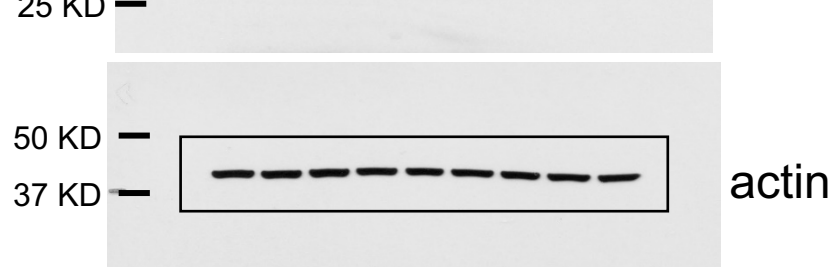

# Figure 5h

KMS-12-PE

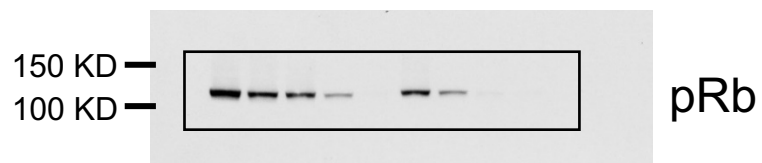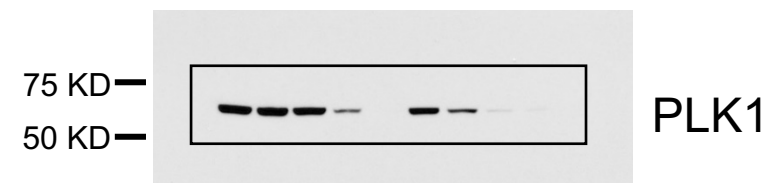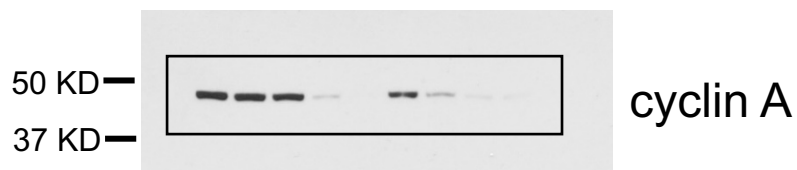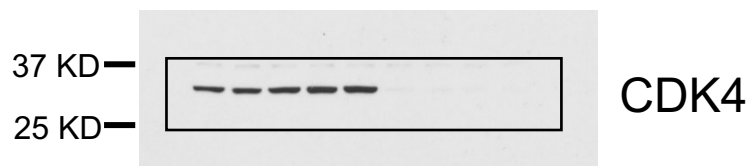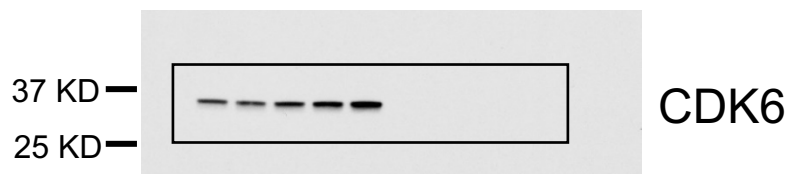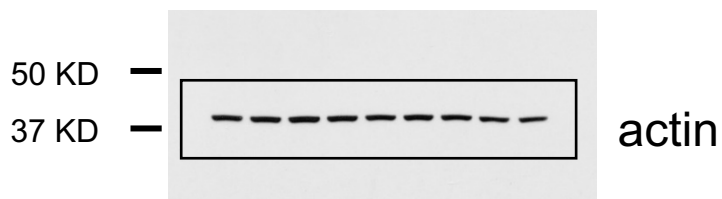

Pfeiffer

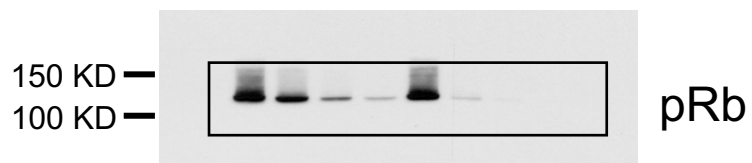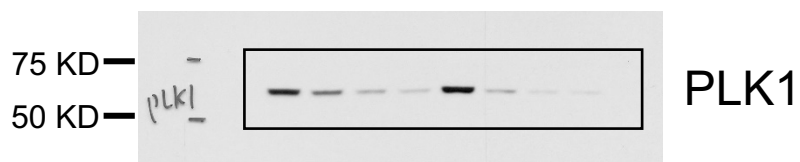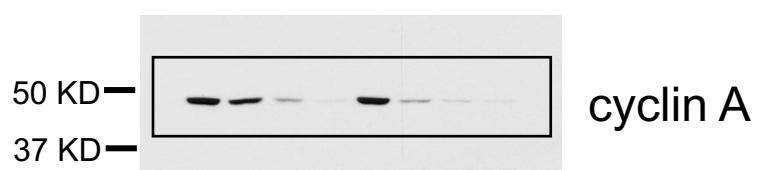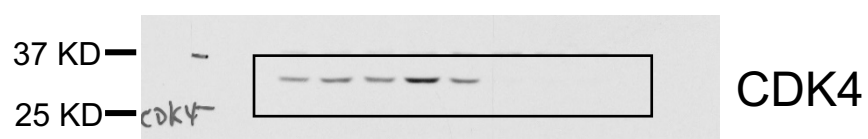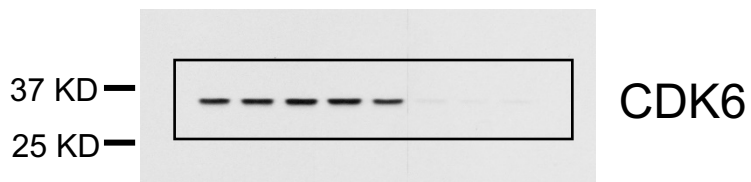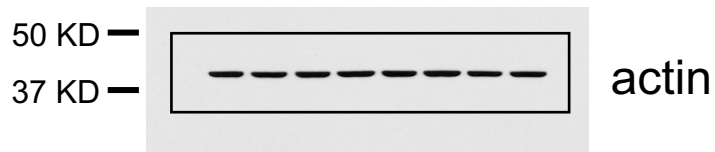

**Figure 5j**

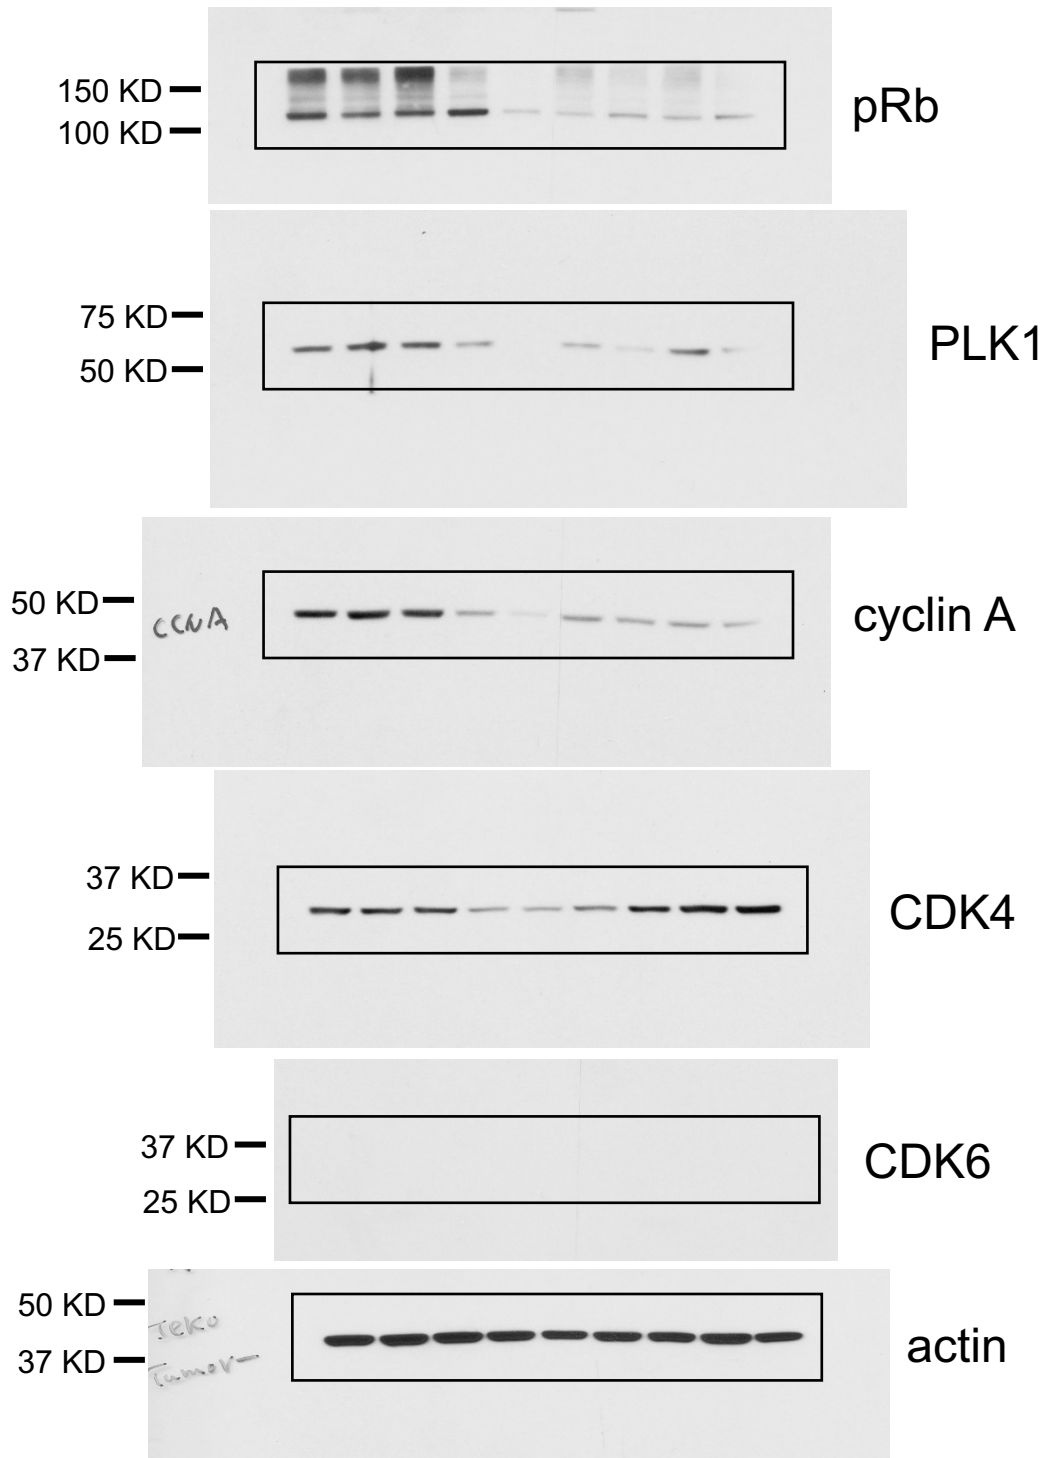



**Fig 5k**

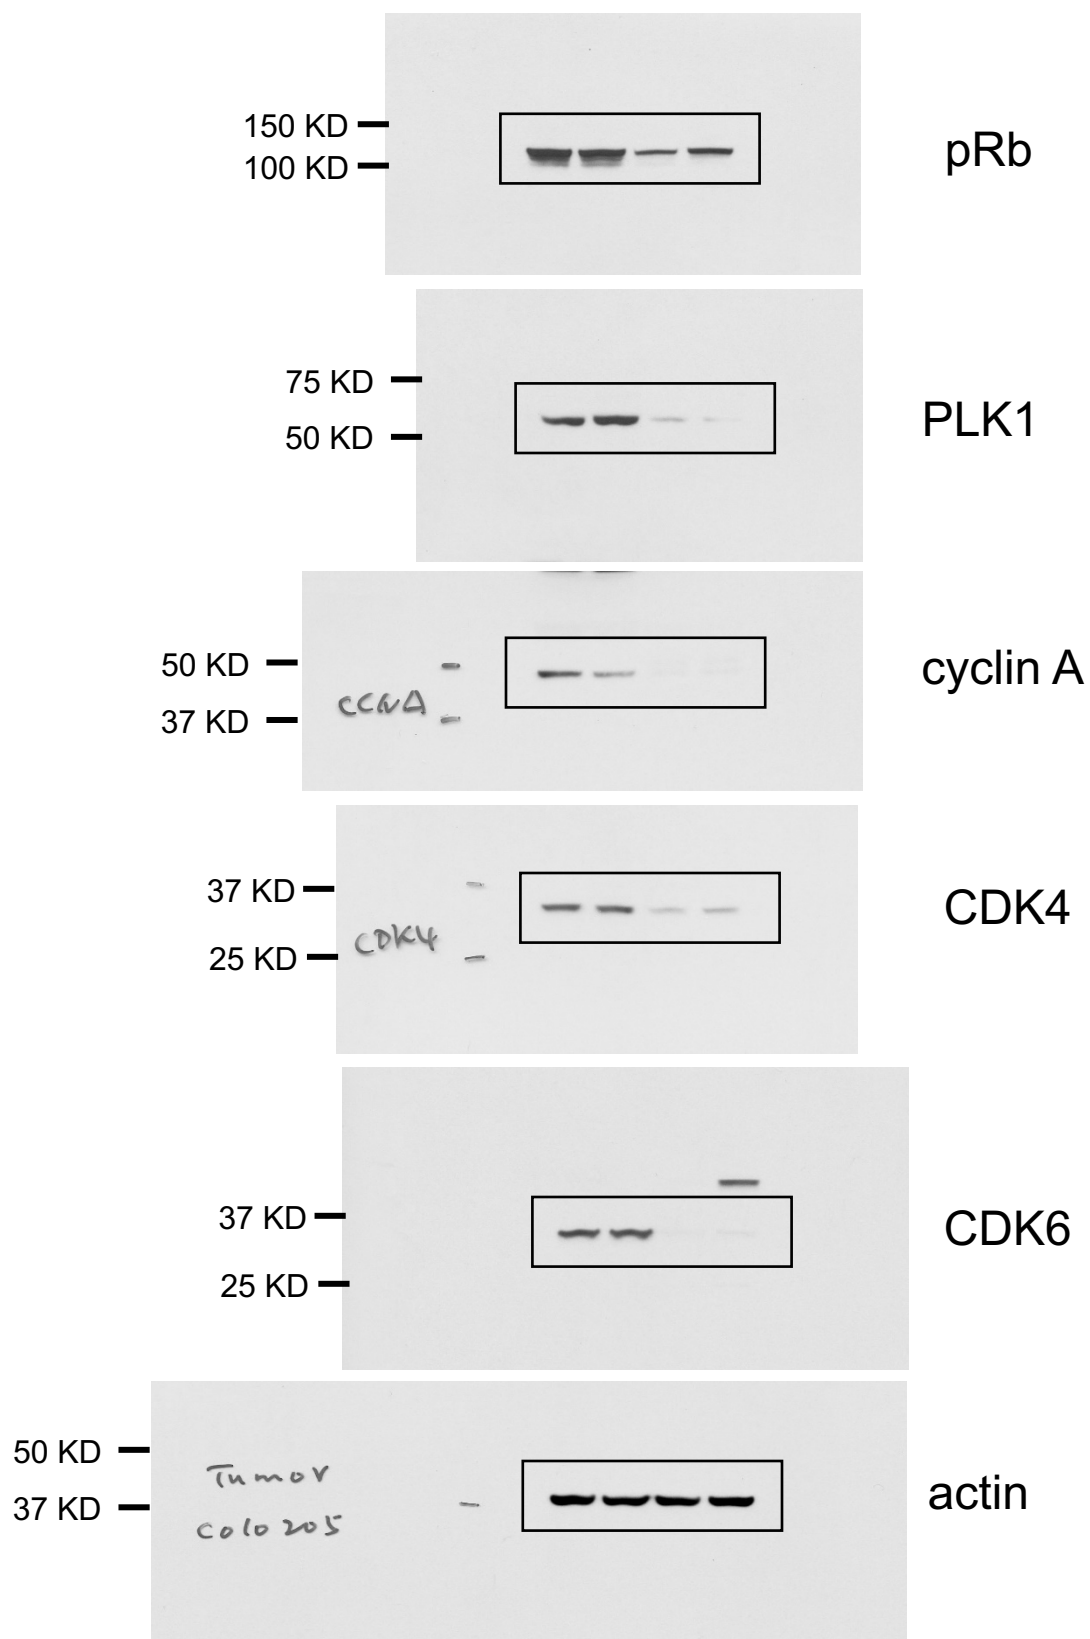

Supplement: NIHMS1684820-supplement-FIG_5__Source_Data_-_Immunoblots.pdf [file NIHMS1684820-supplement-FIG_5__Source_Data_-_Immunoblots.pdf]
