# Supplementary material
Source: PubMed Central journal article supplement (PMC8462800)

**Figure 6b**

A375

SKMEL2

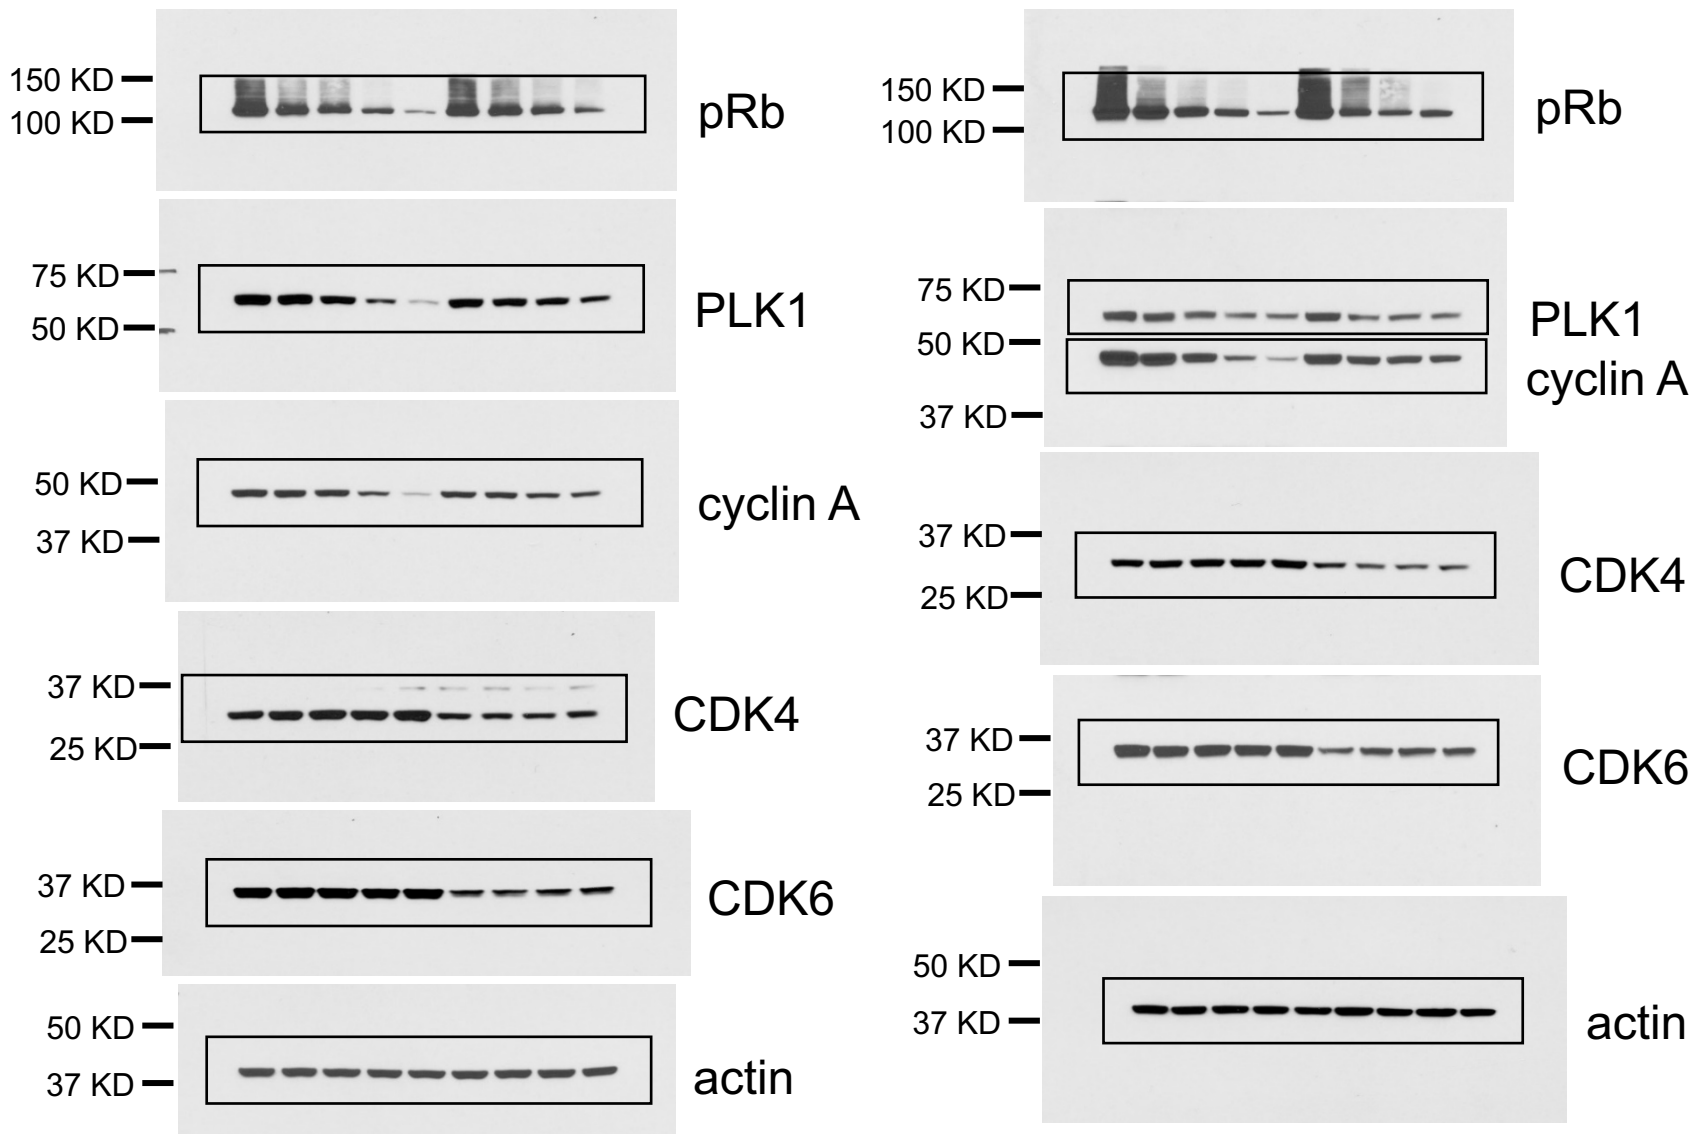

# Figure 6b

## Calu6

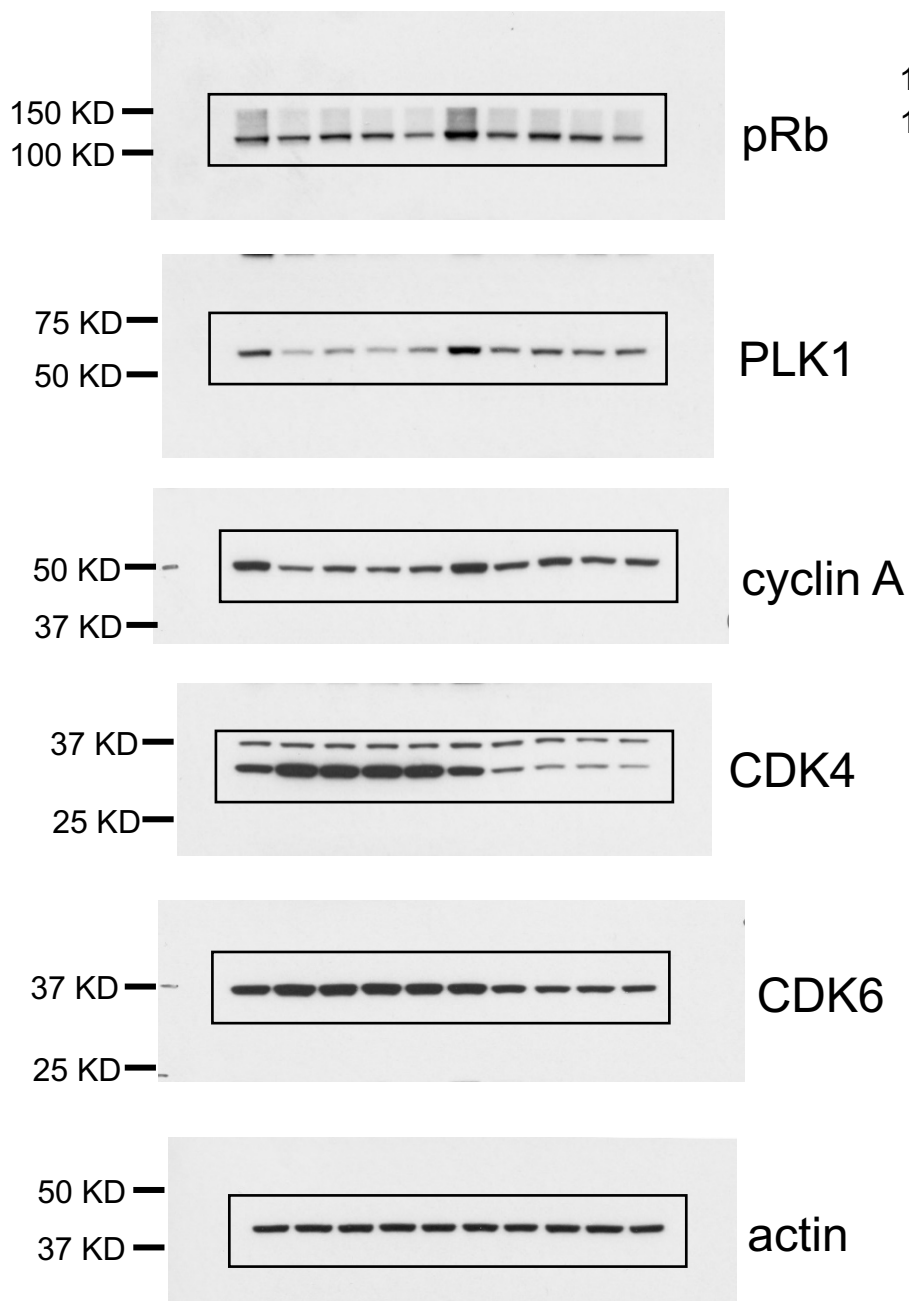

# Figure 6c

## A549

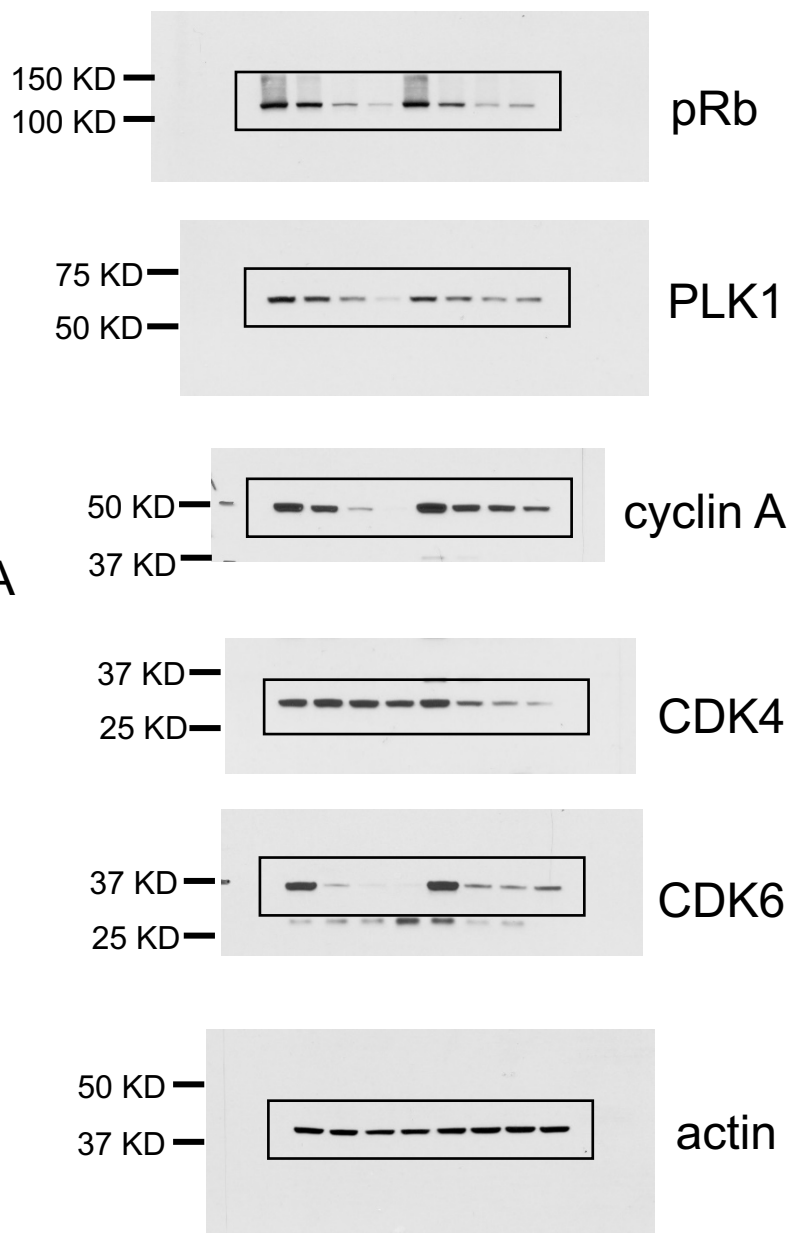

# Figure 6c

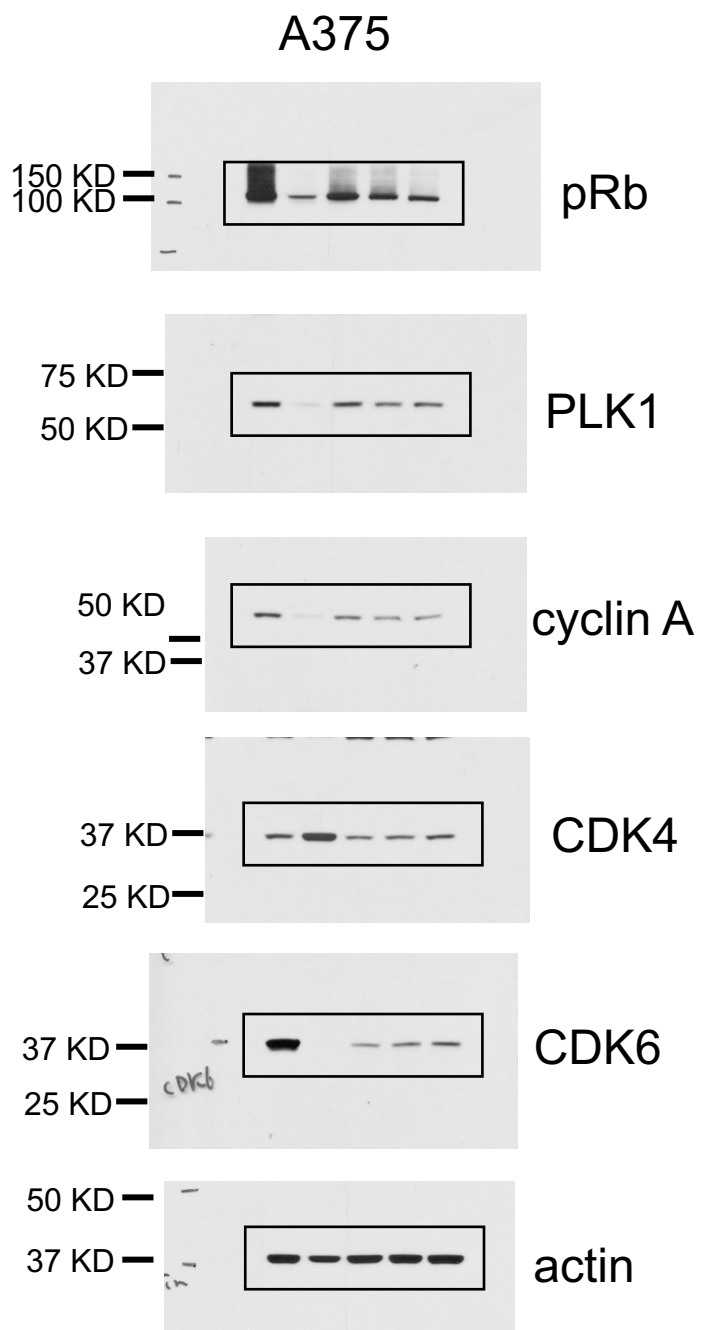

# Figure 6e

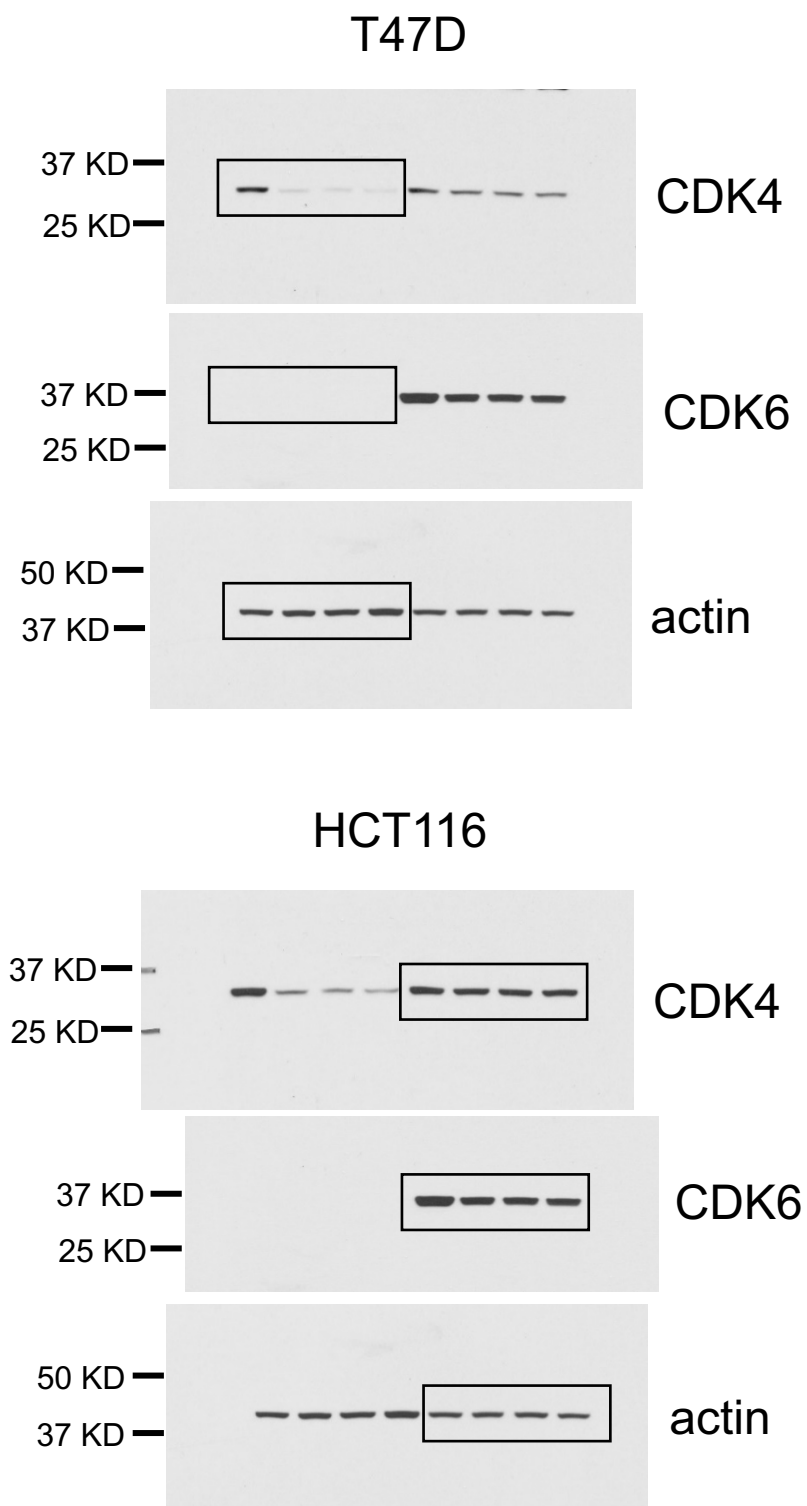

**Figure 6e**

JeKo-1 A375

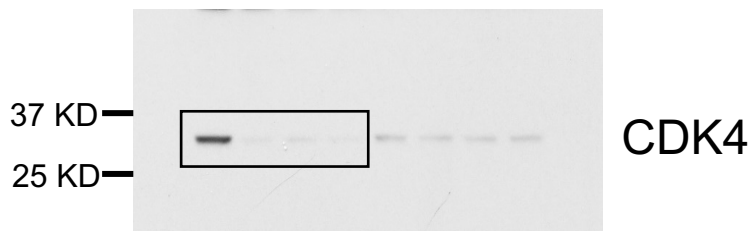

Colo205 A549

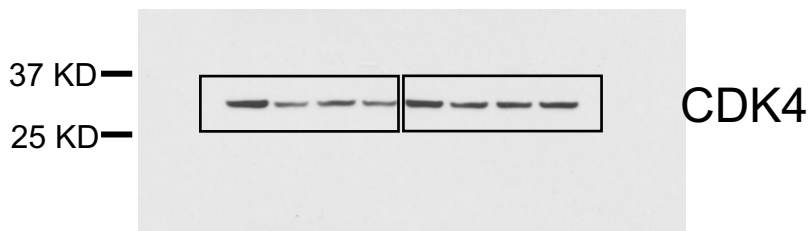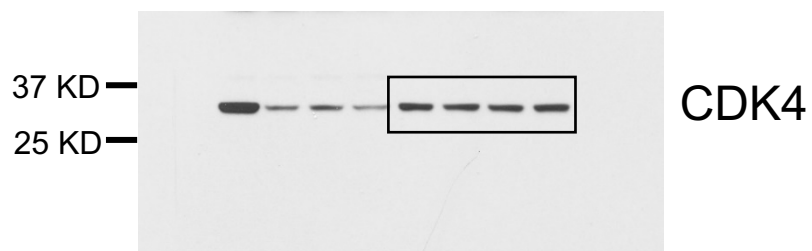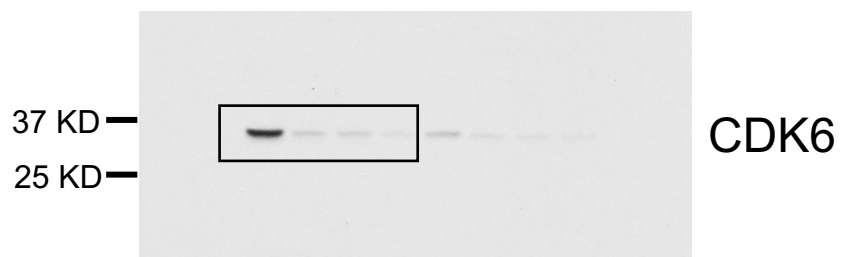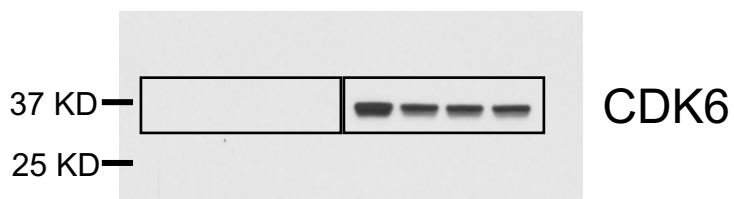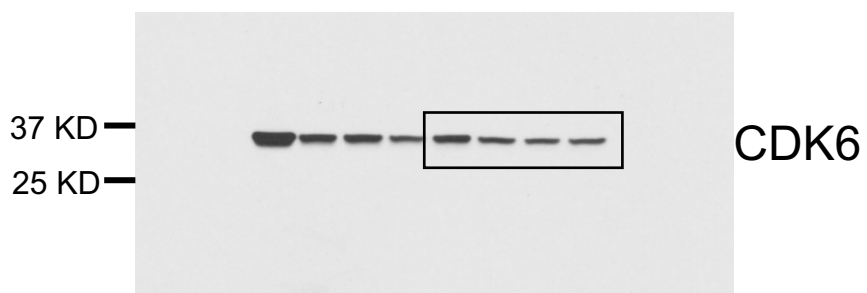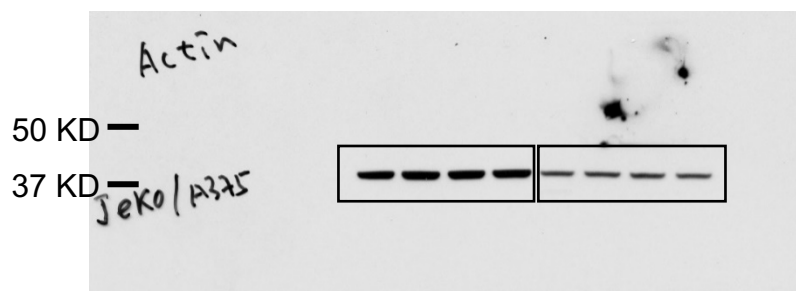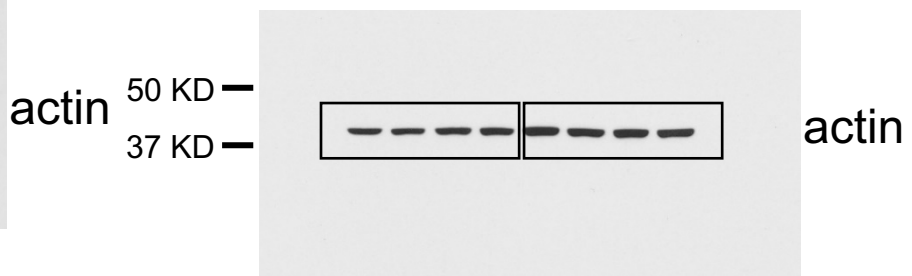

JeKo-1 A375

# Figure 6e

KMS-12-PE

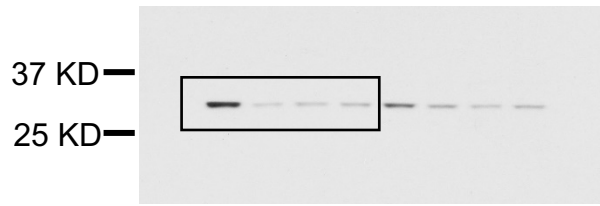

SKMEL2

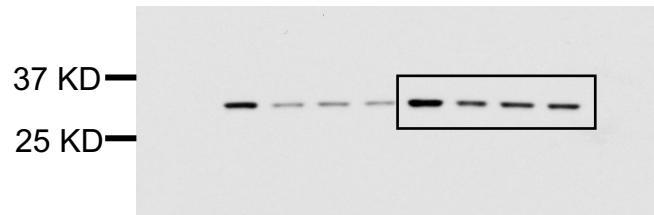

CDK4

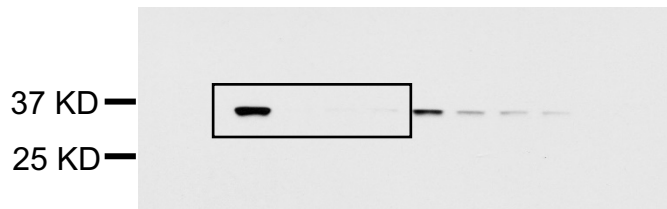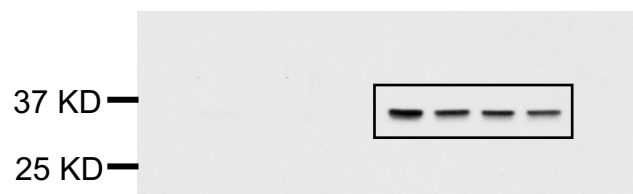

CDK6

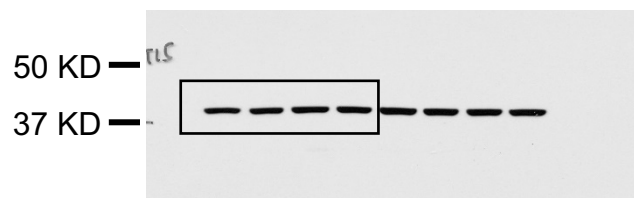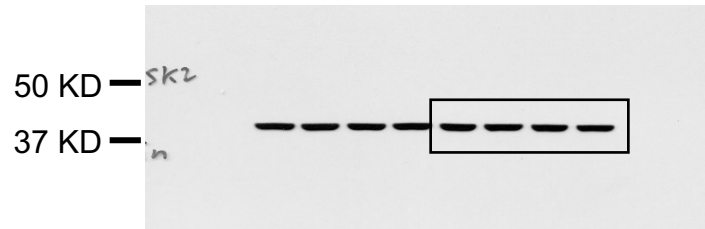

actin

Calu6

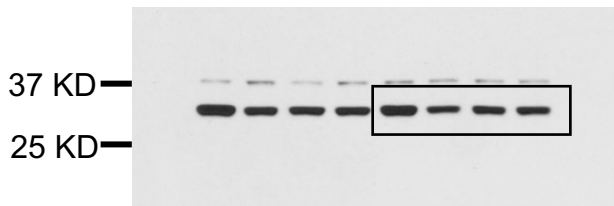

HCT15

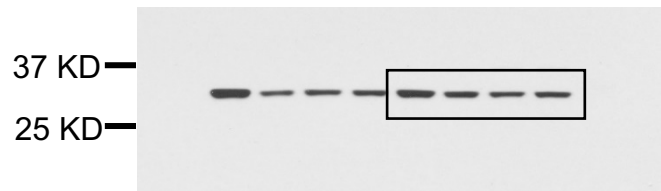

CDK4

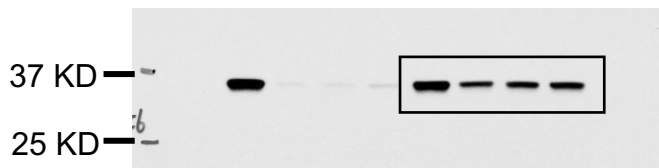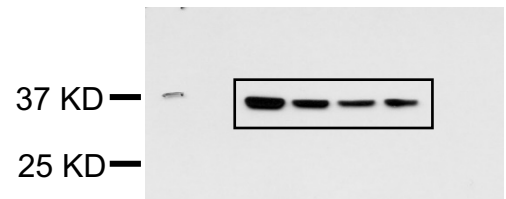

CDK6

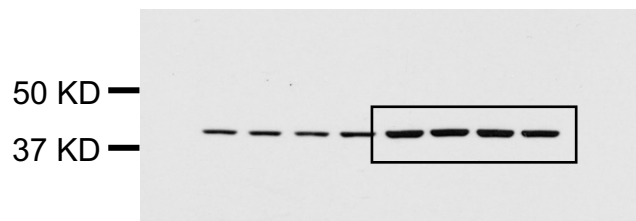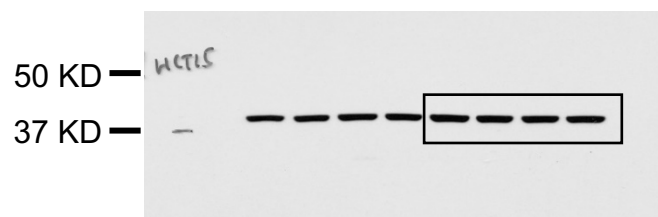

actin

# Figure 6e

U87MG

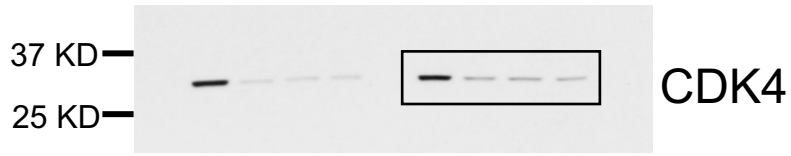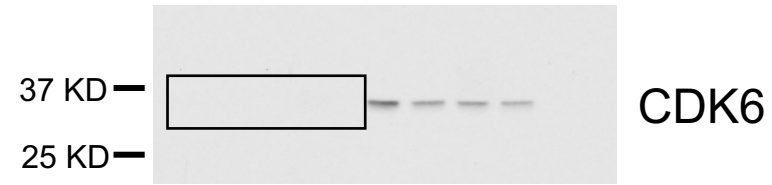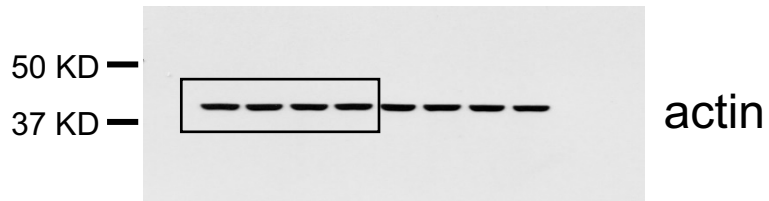

MV4-11

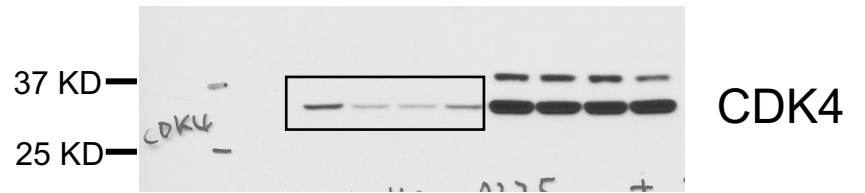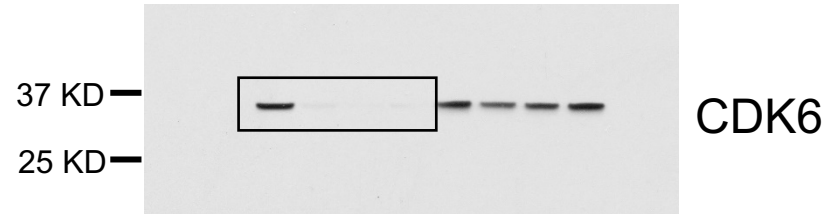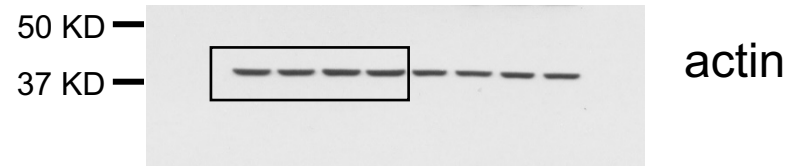

**Figure 6f**

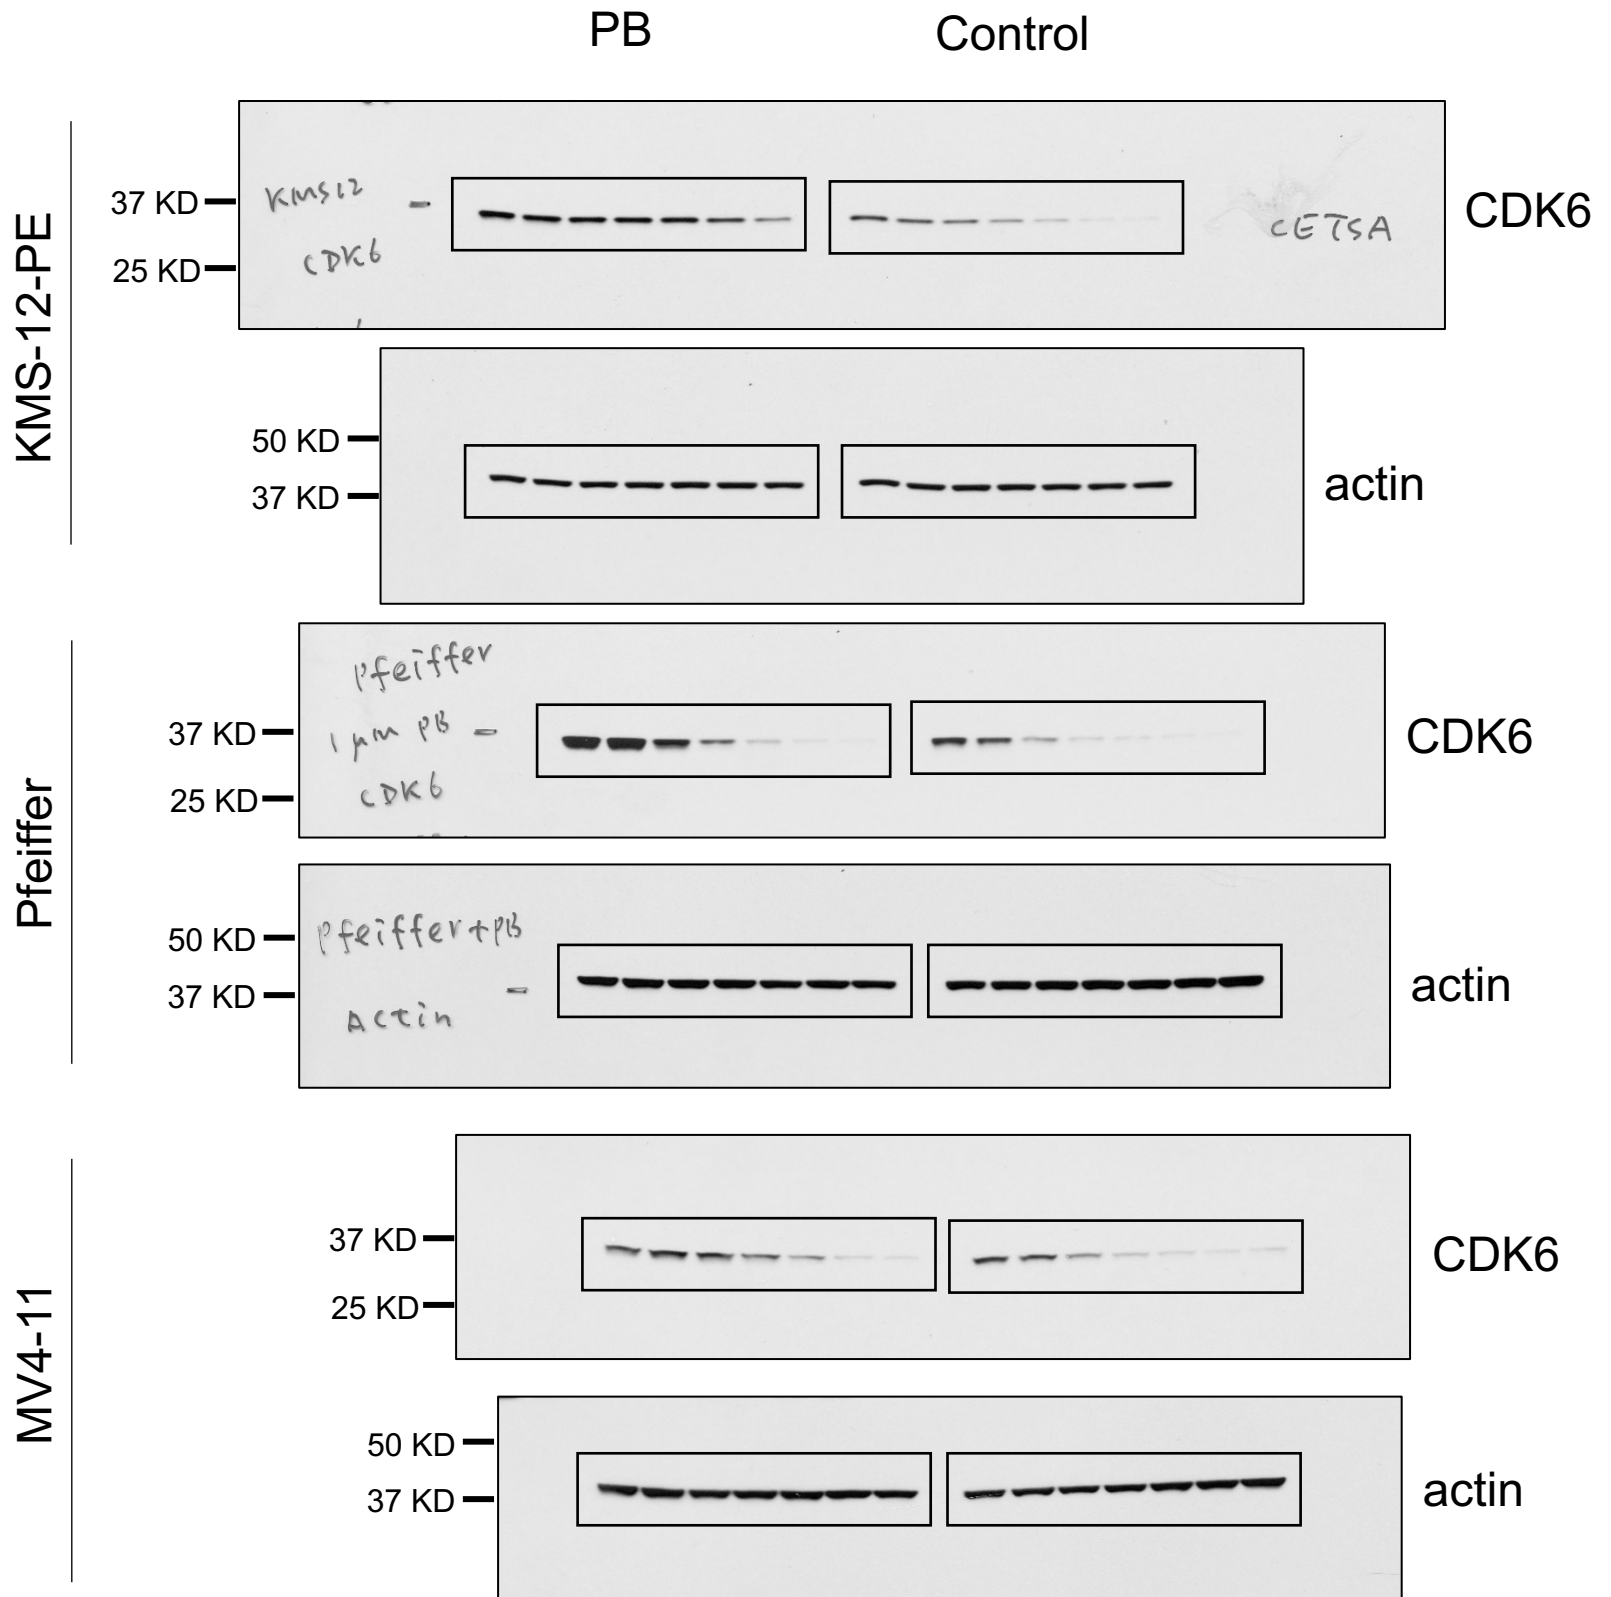

**Figure 6f**

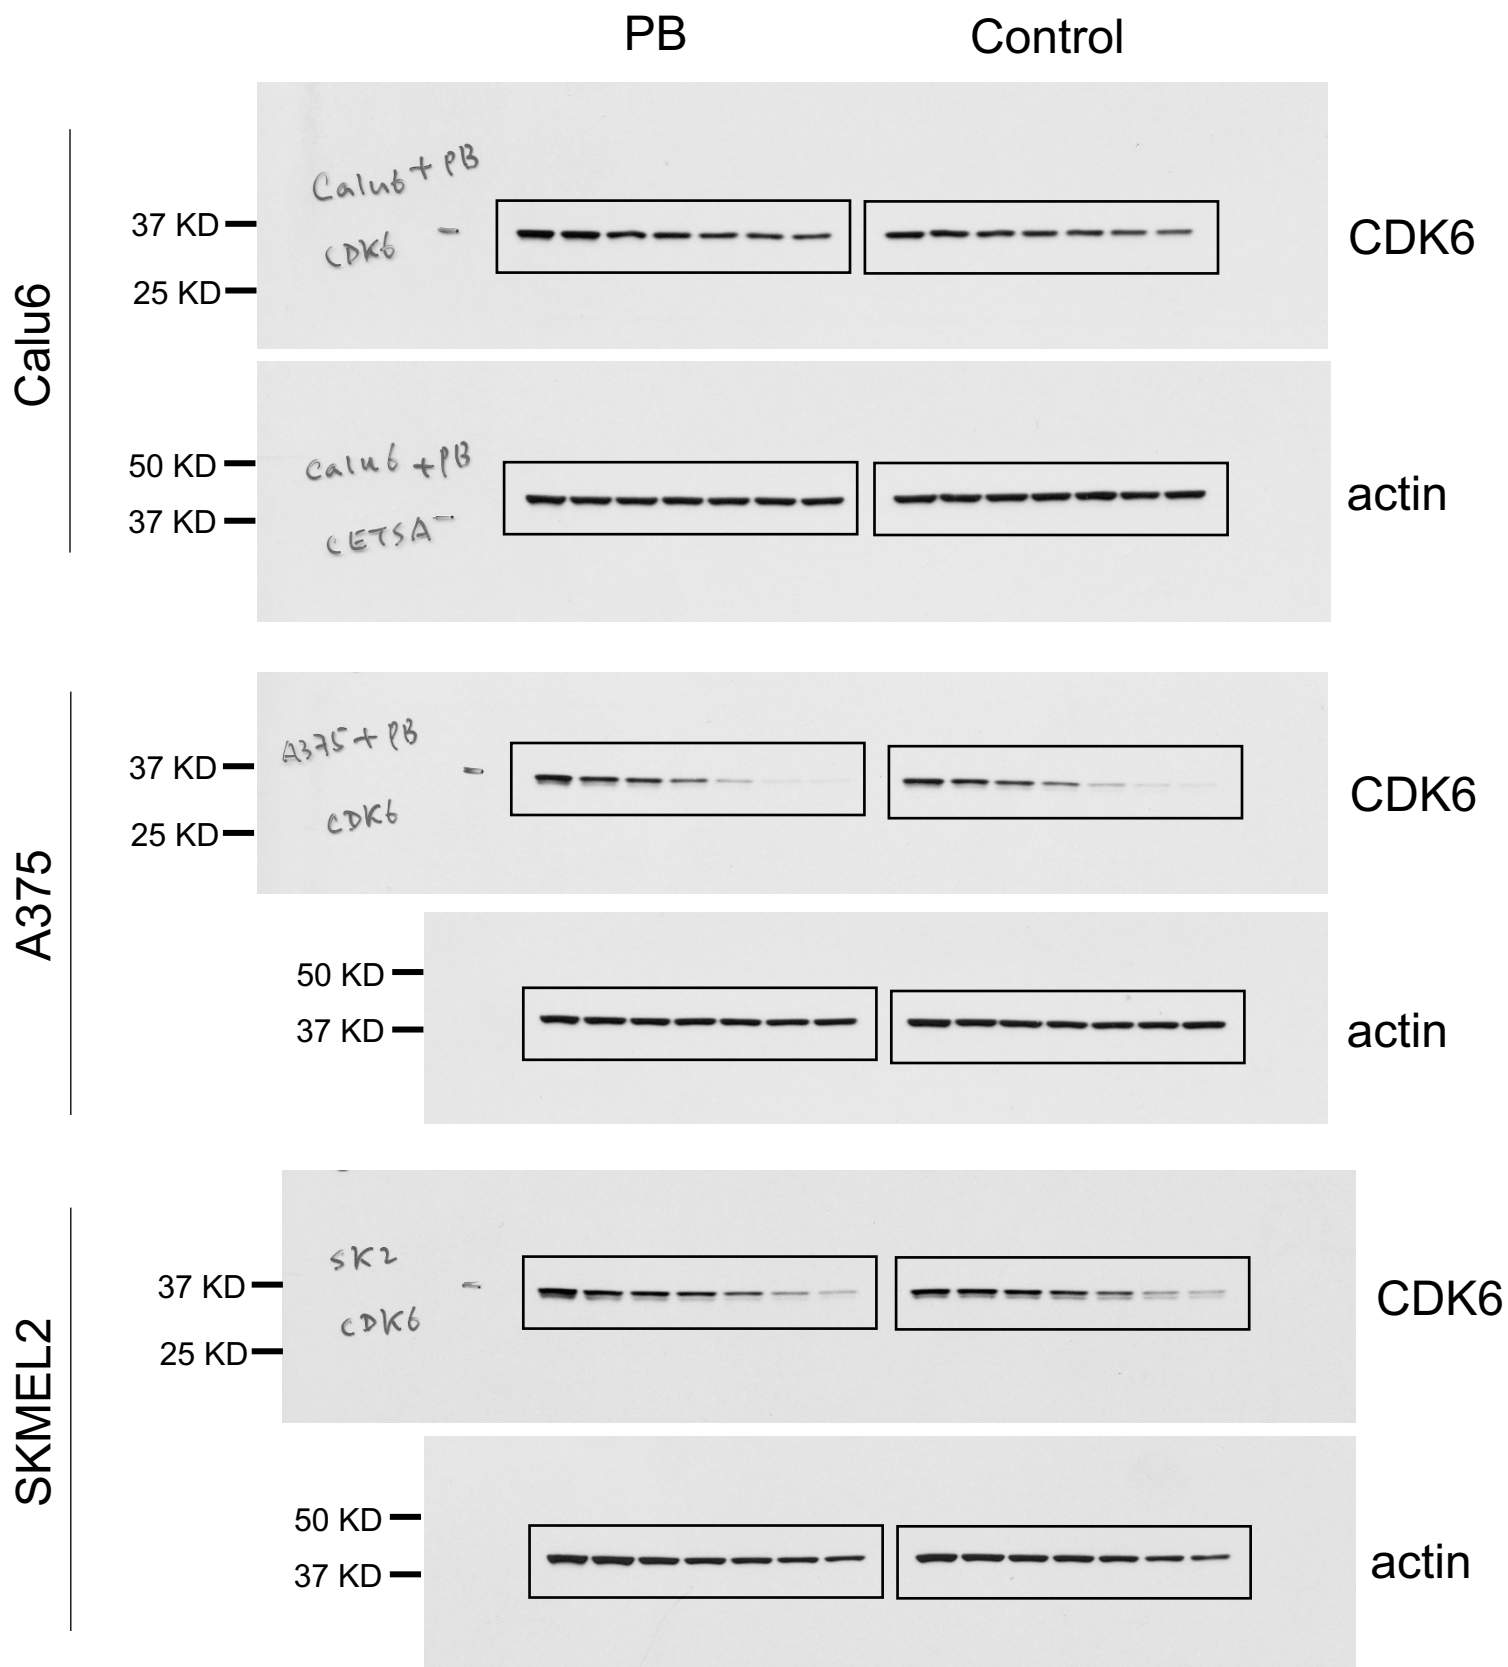



# Figure 6g

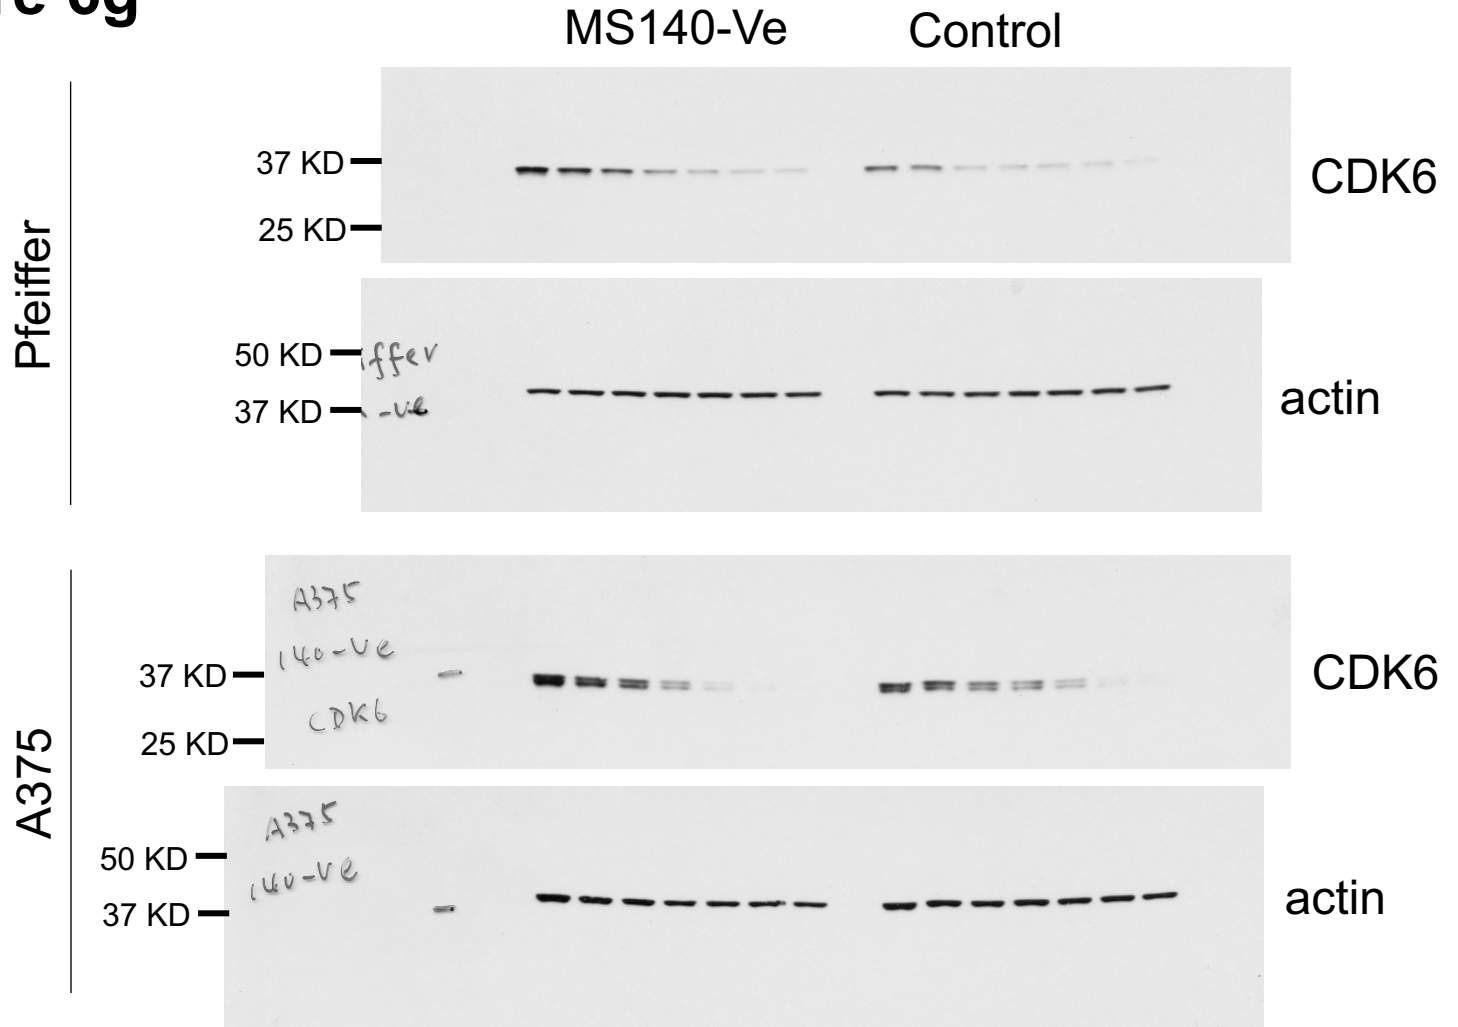

# Figure 6h

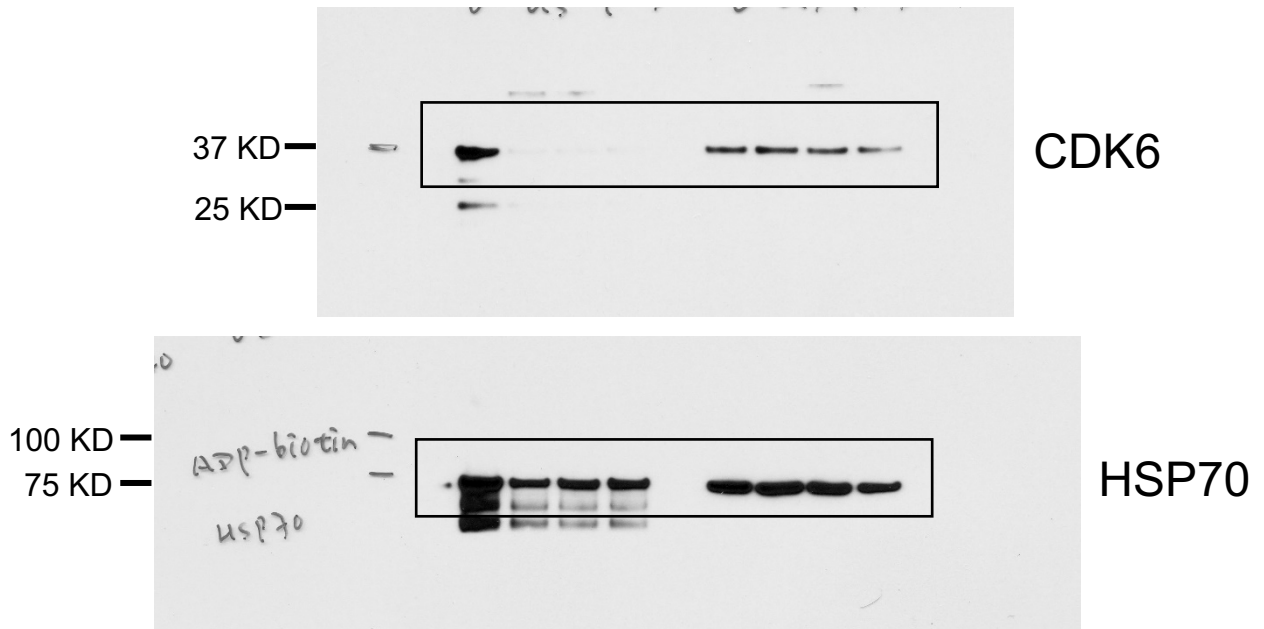

Supplement: NIHMS1684820-supplement-FIG_6__Source_Data_-_Immunoblots.pdf [file NIHMS1684820-supplement-FIG_6__Source_Data_-_Immunoblots.pdf]
