# Supplementary material
Source: PubMed Central journal article supplement (PMC8462800)

# Figure 7a

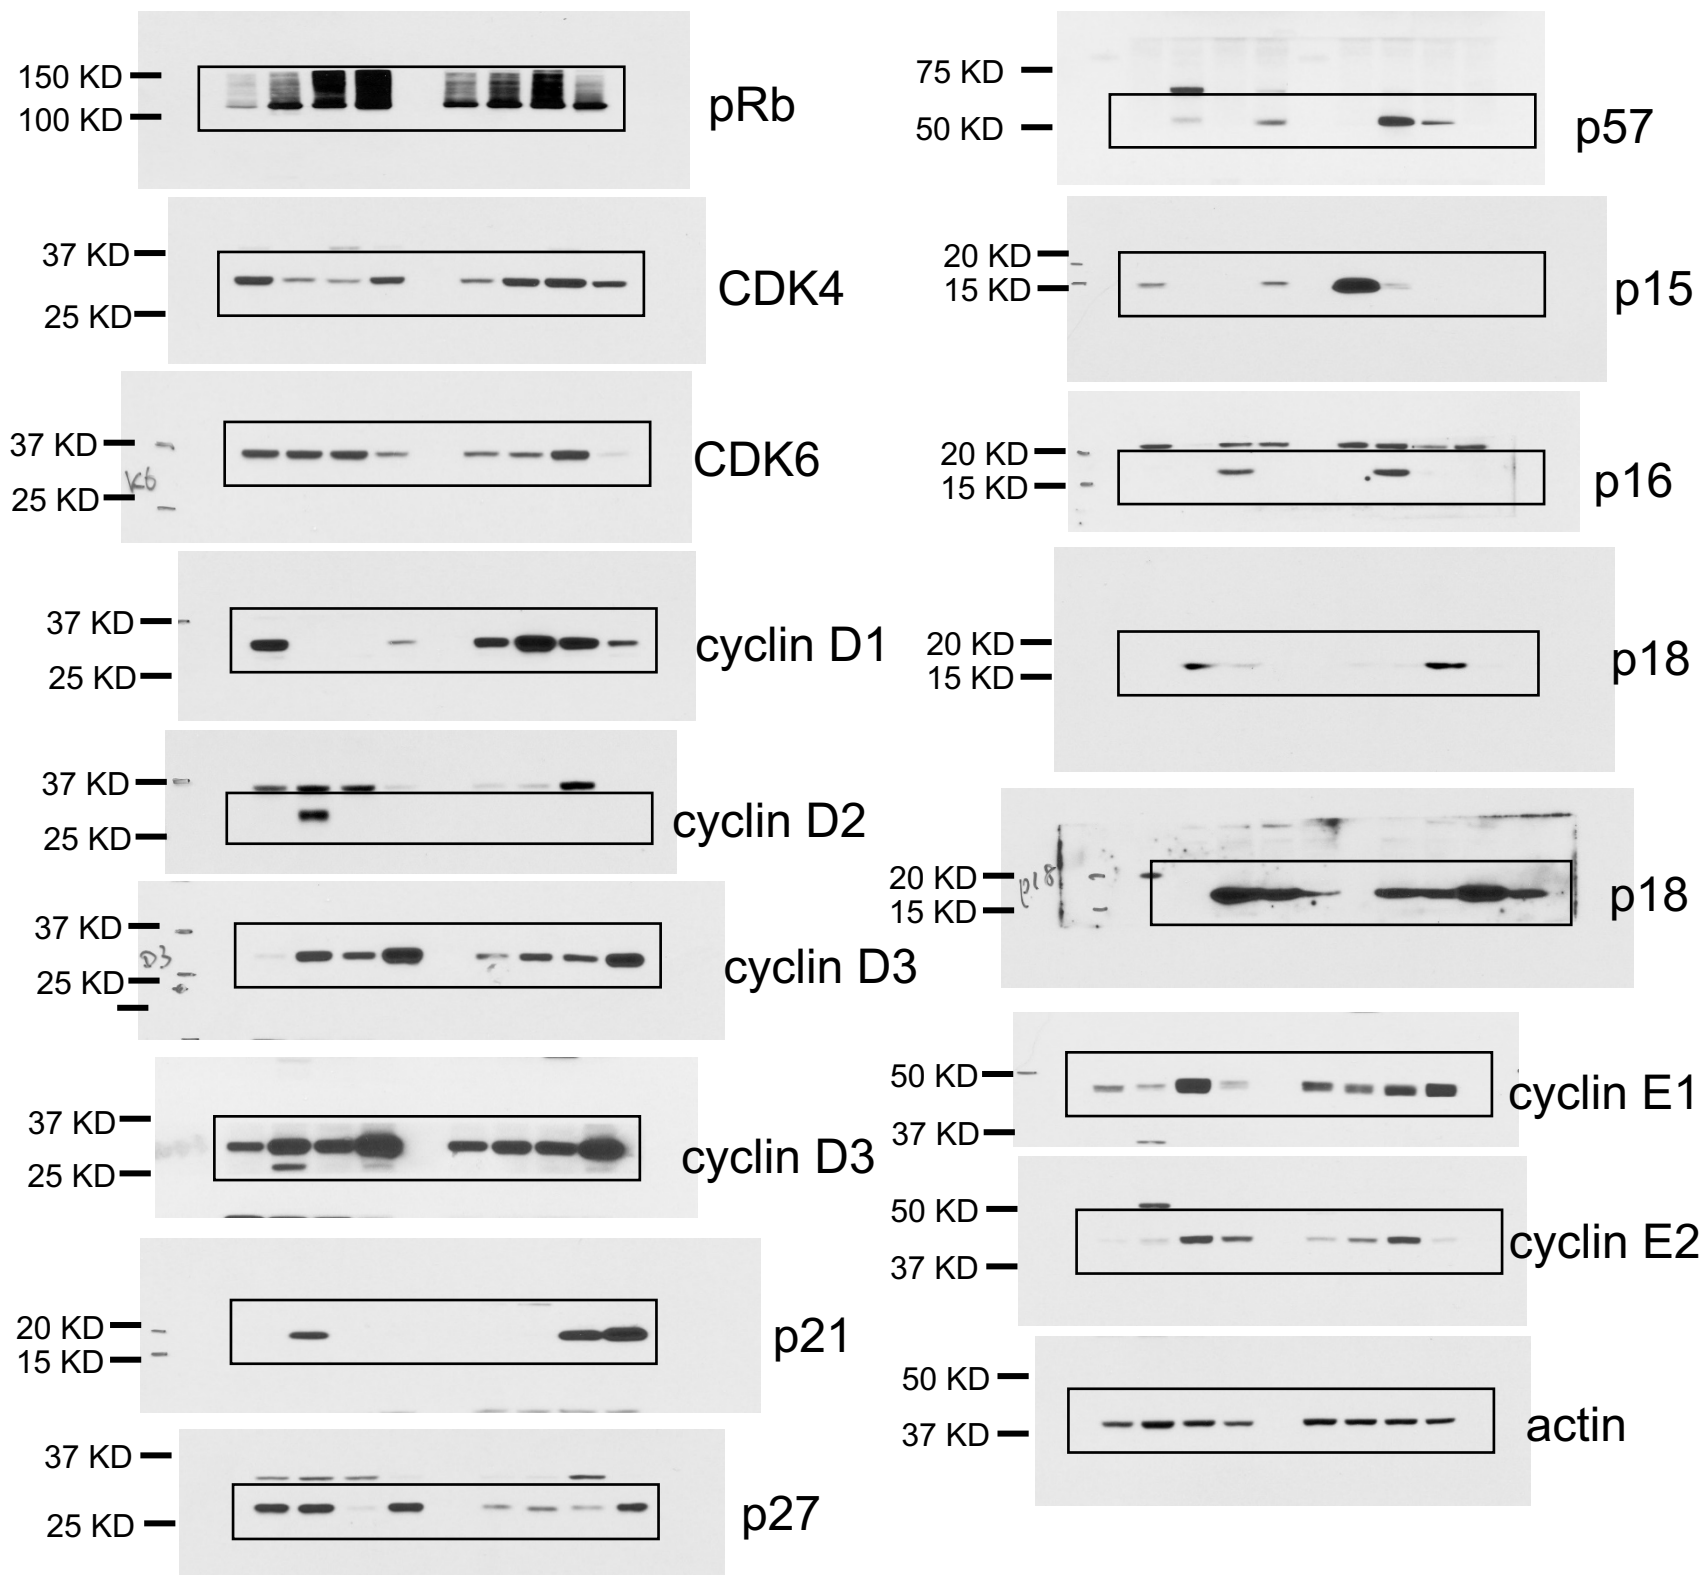

**Fig 7c**

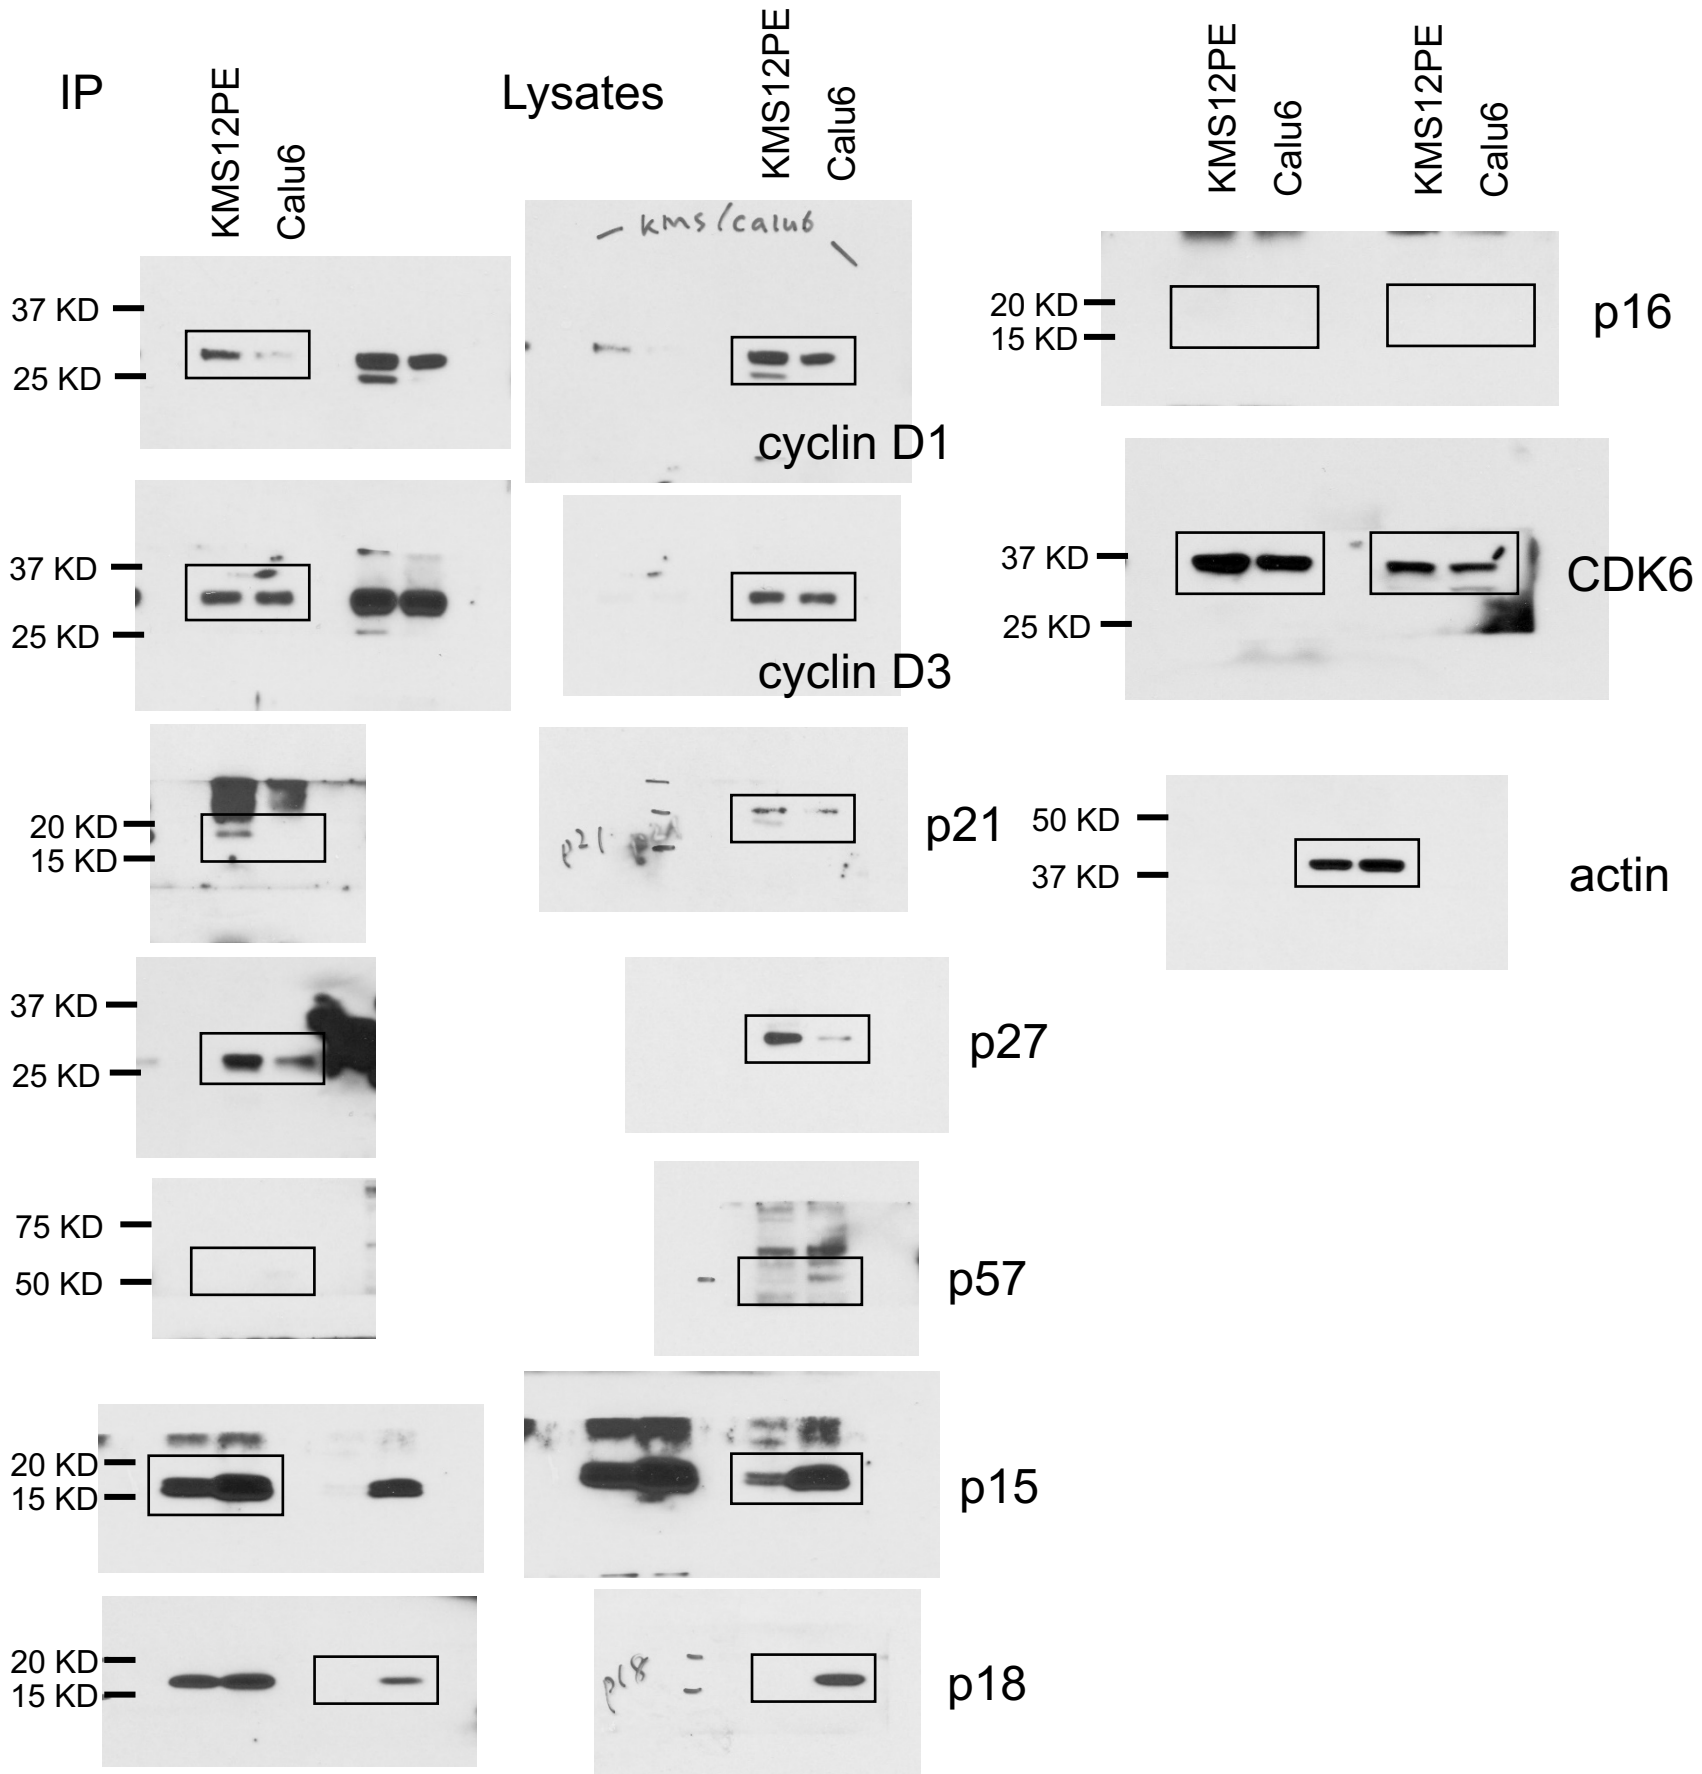

**Fig 7c**

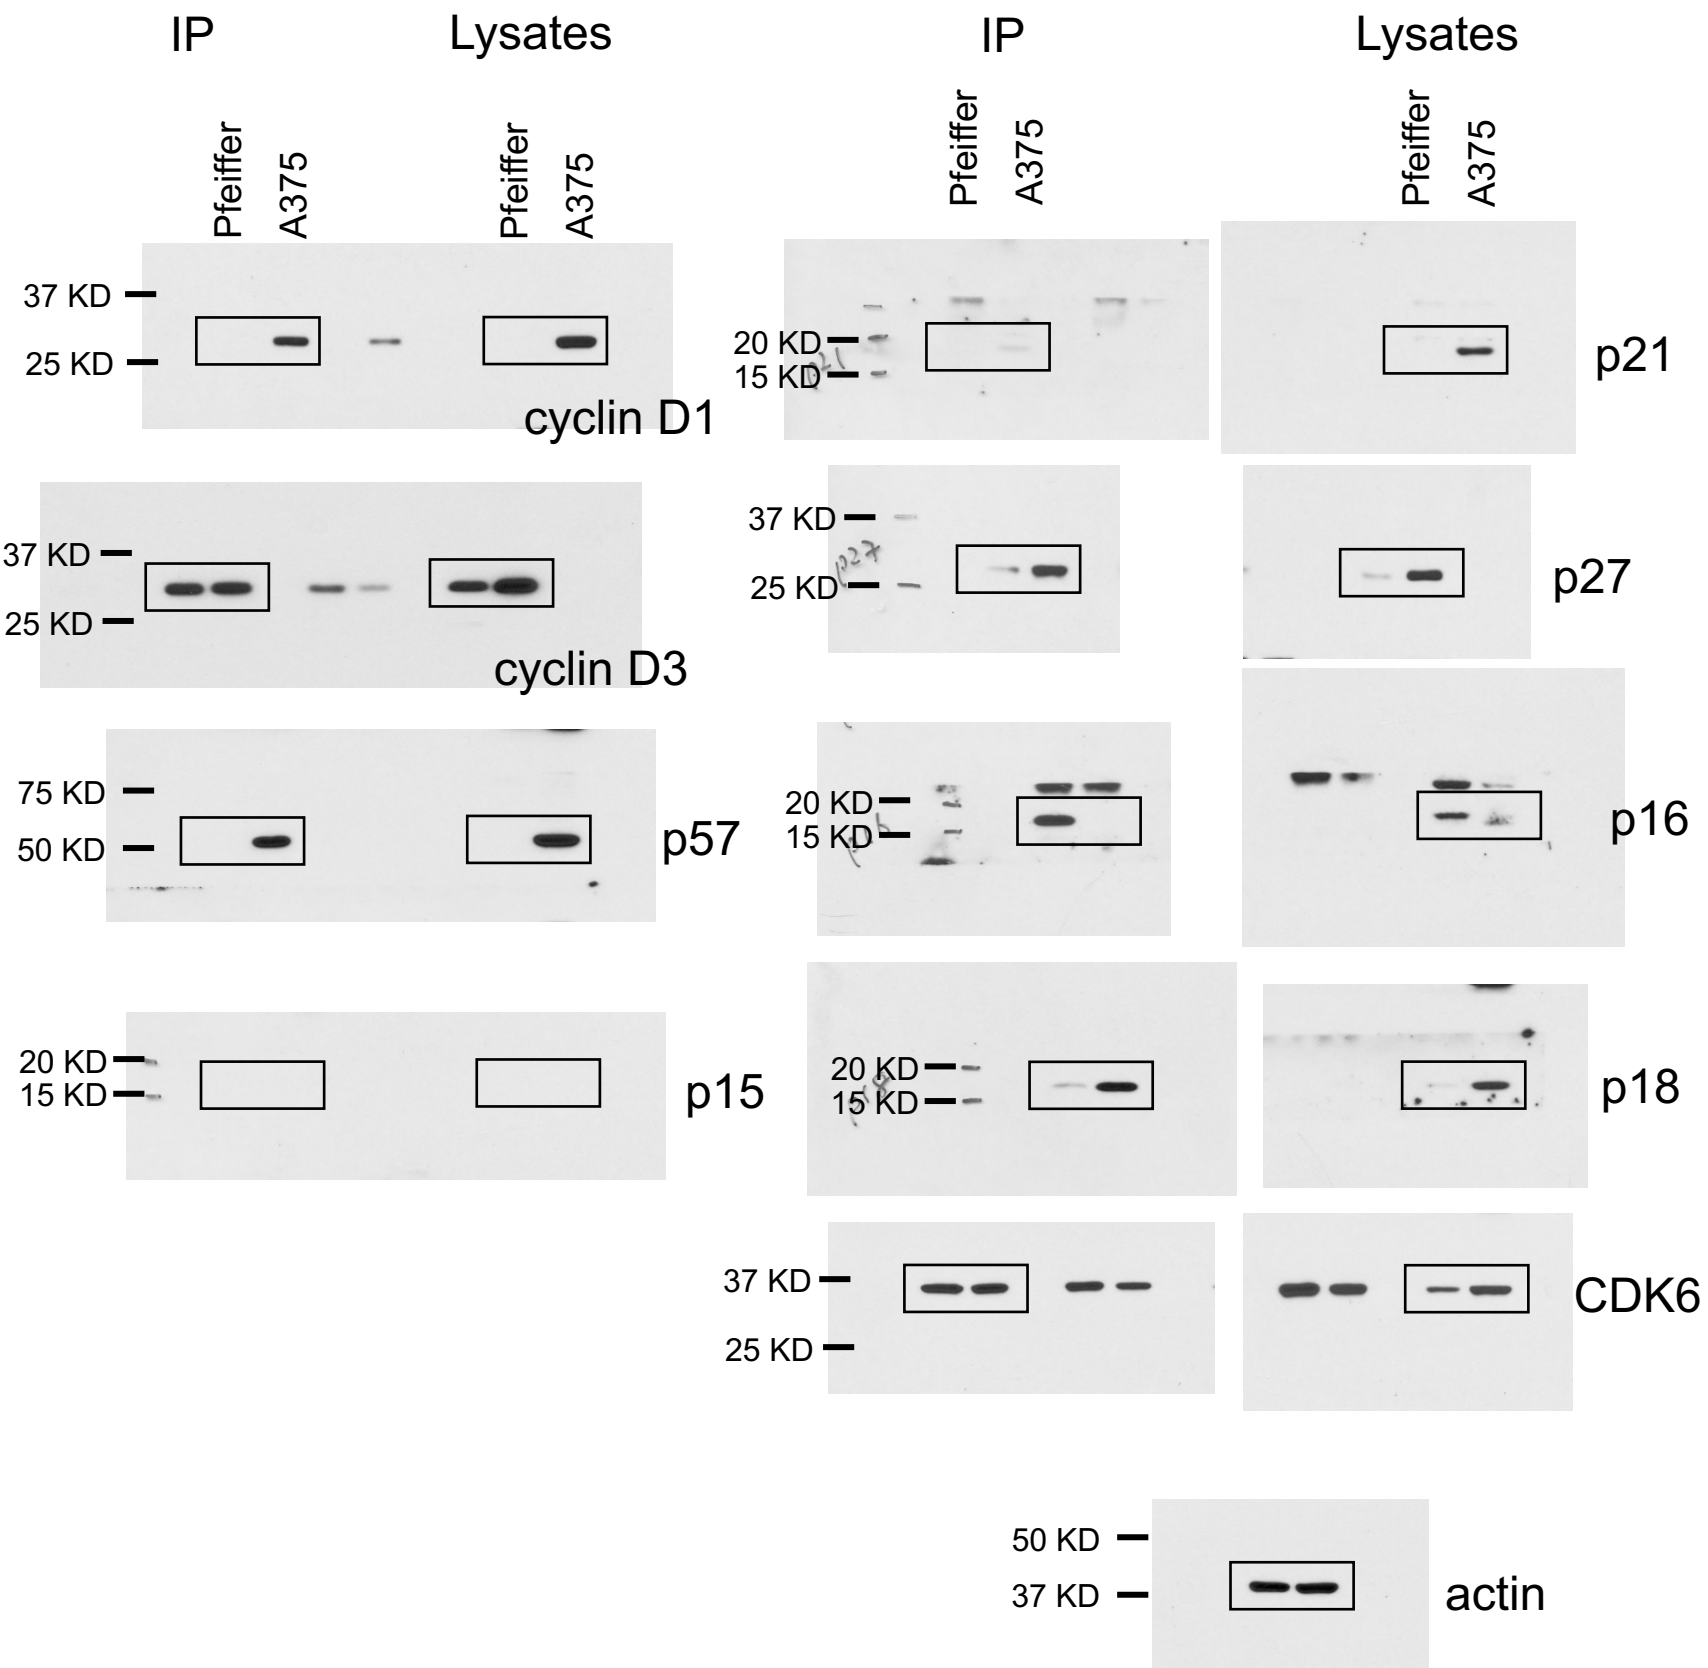

# Figure 7d

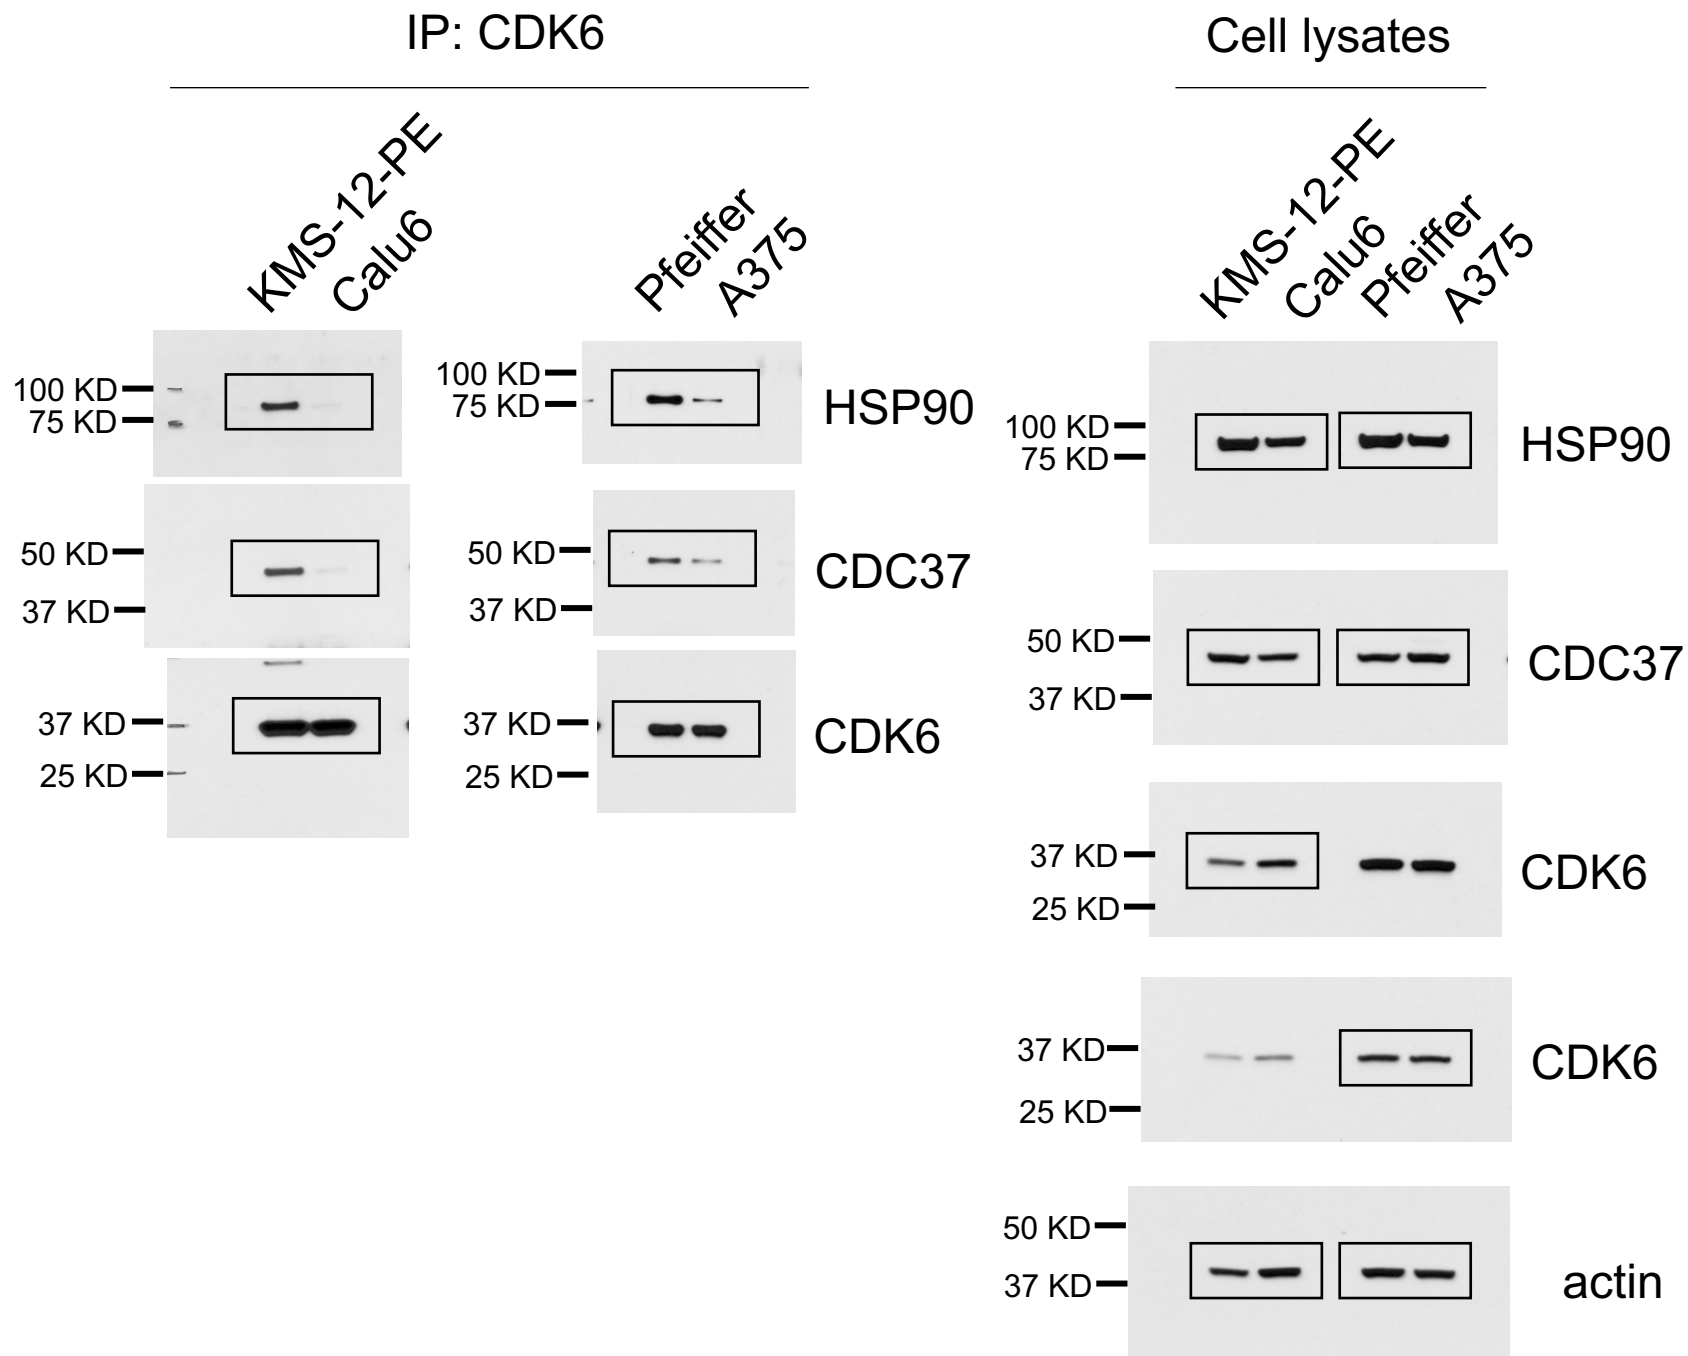

**Figure 7e**

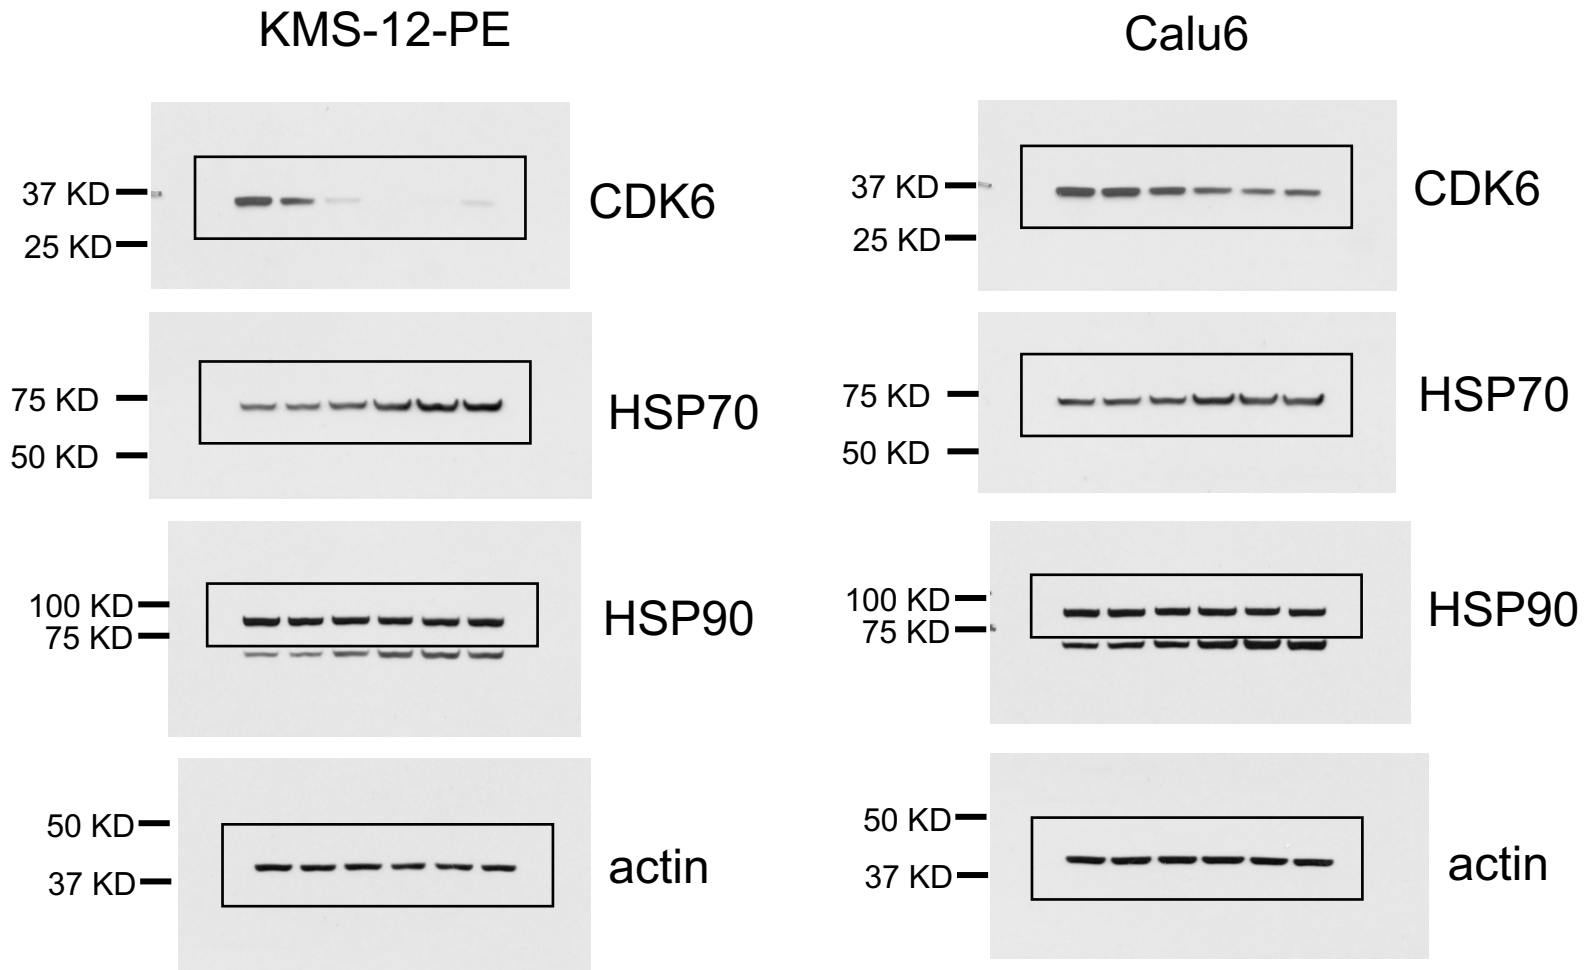

**Figure 7e**

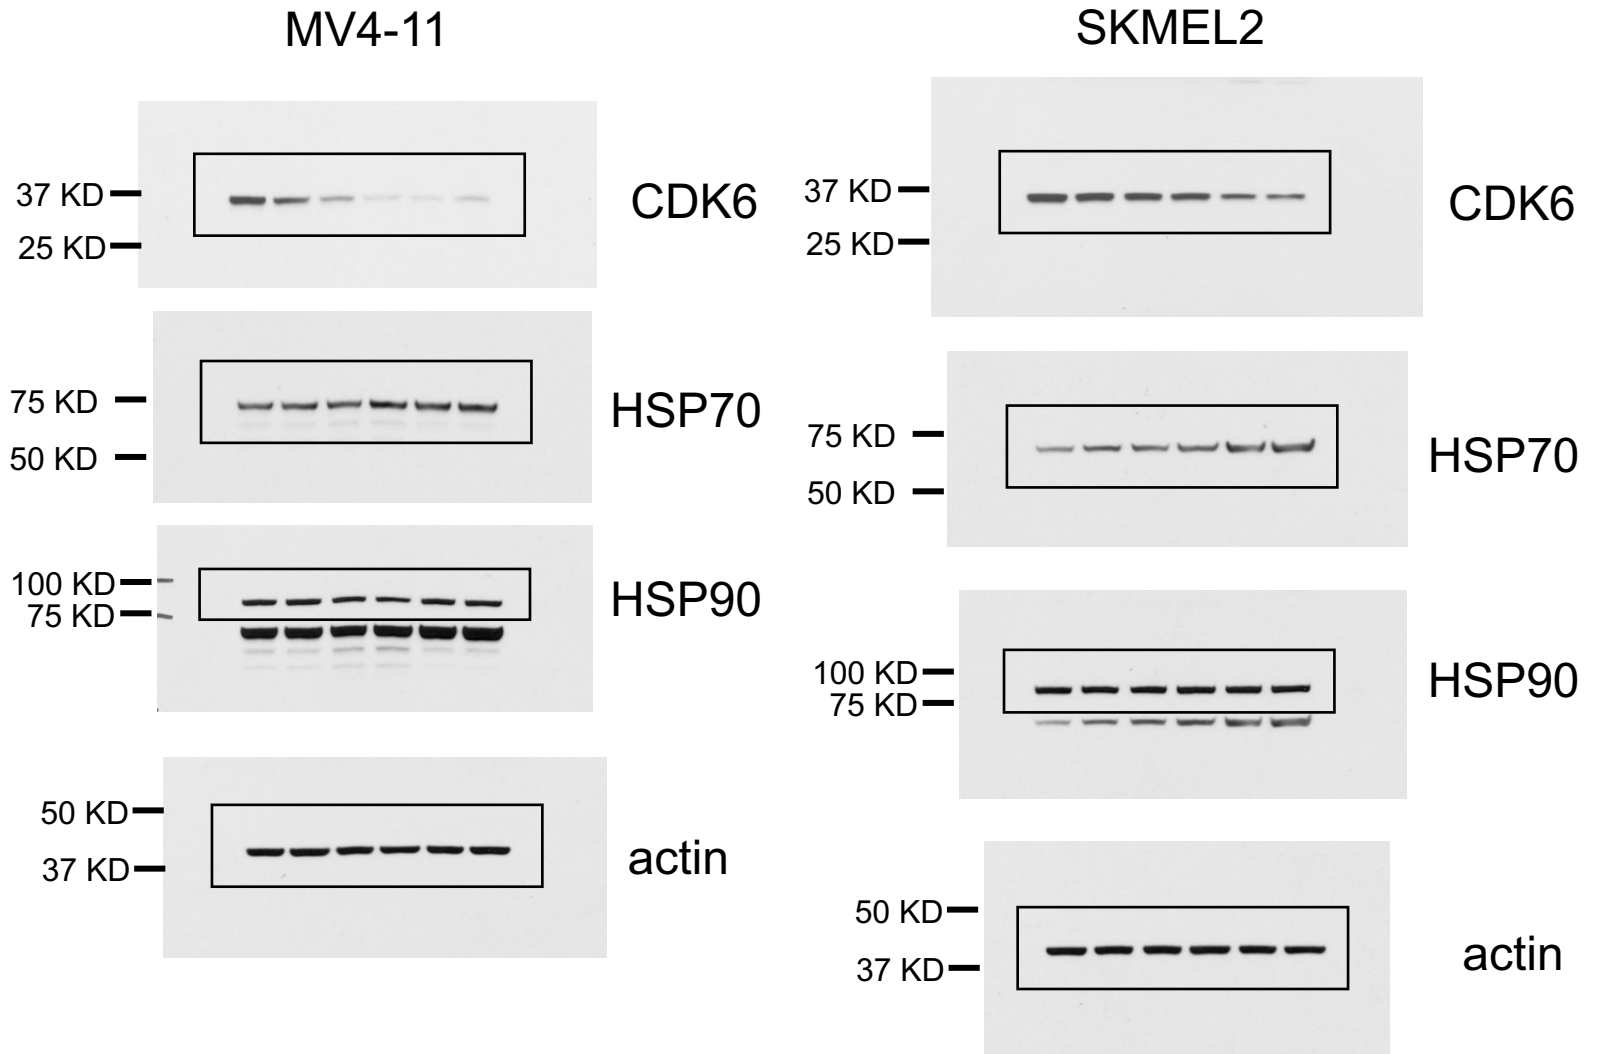

# Figure 7f

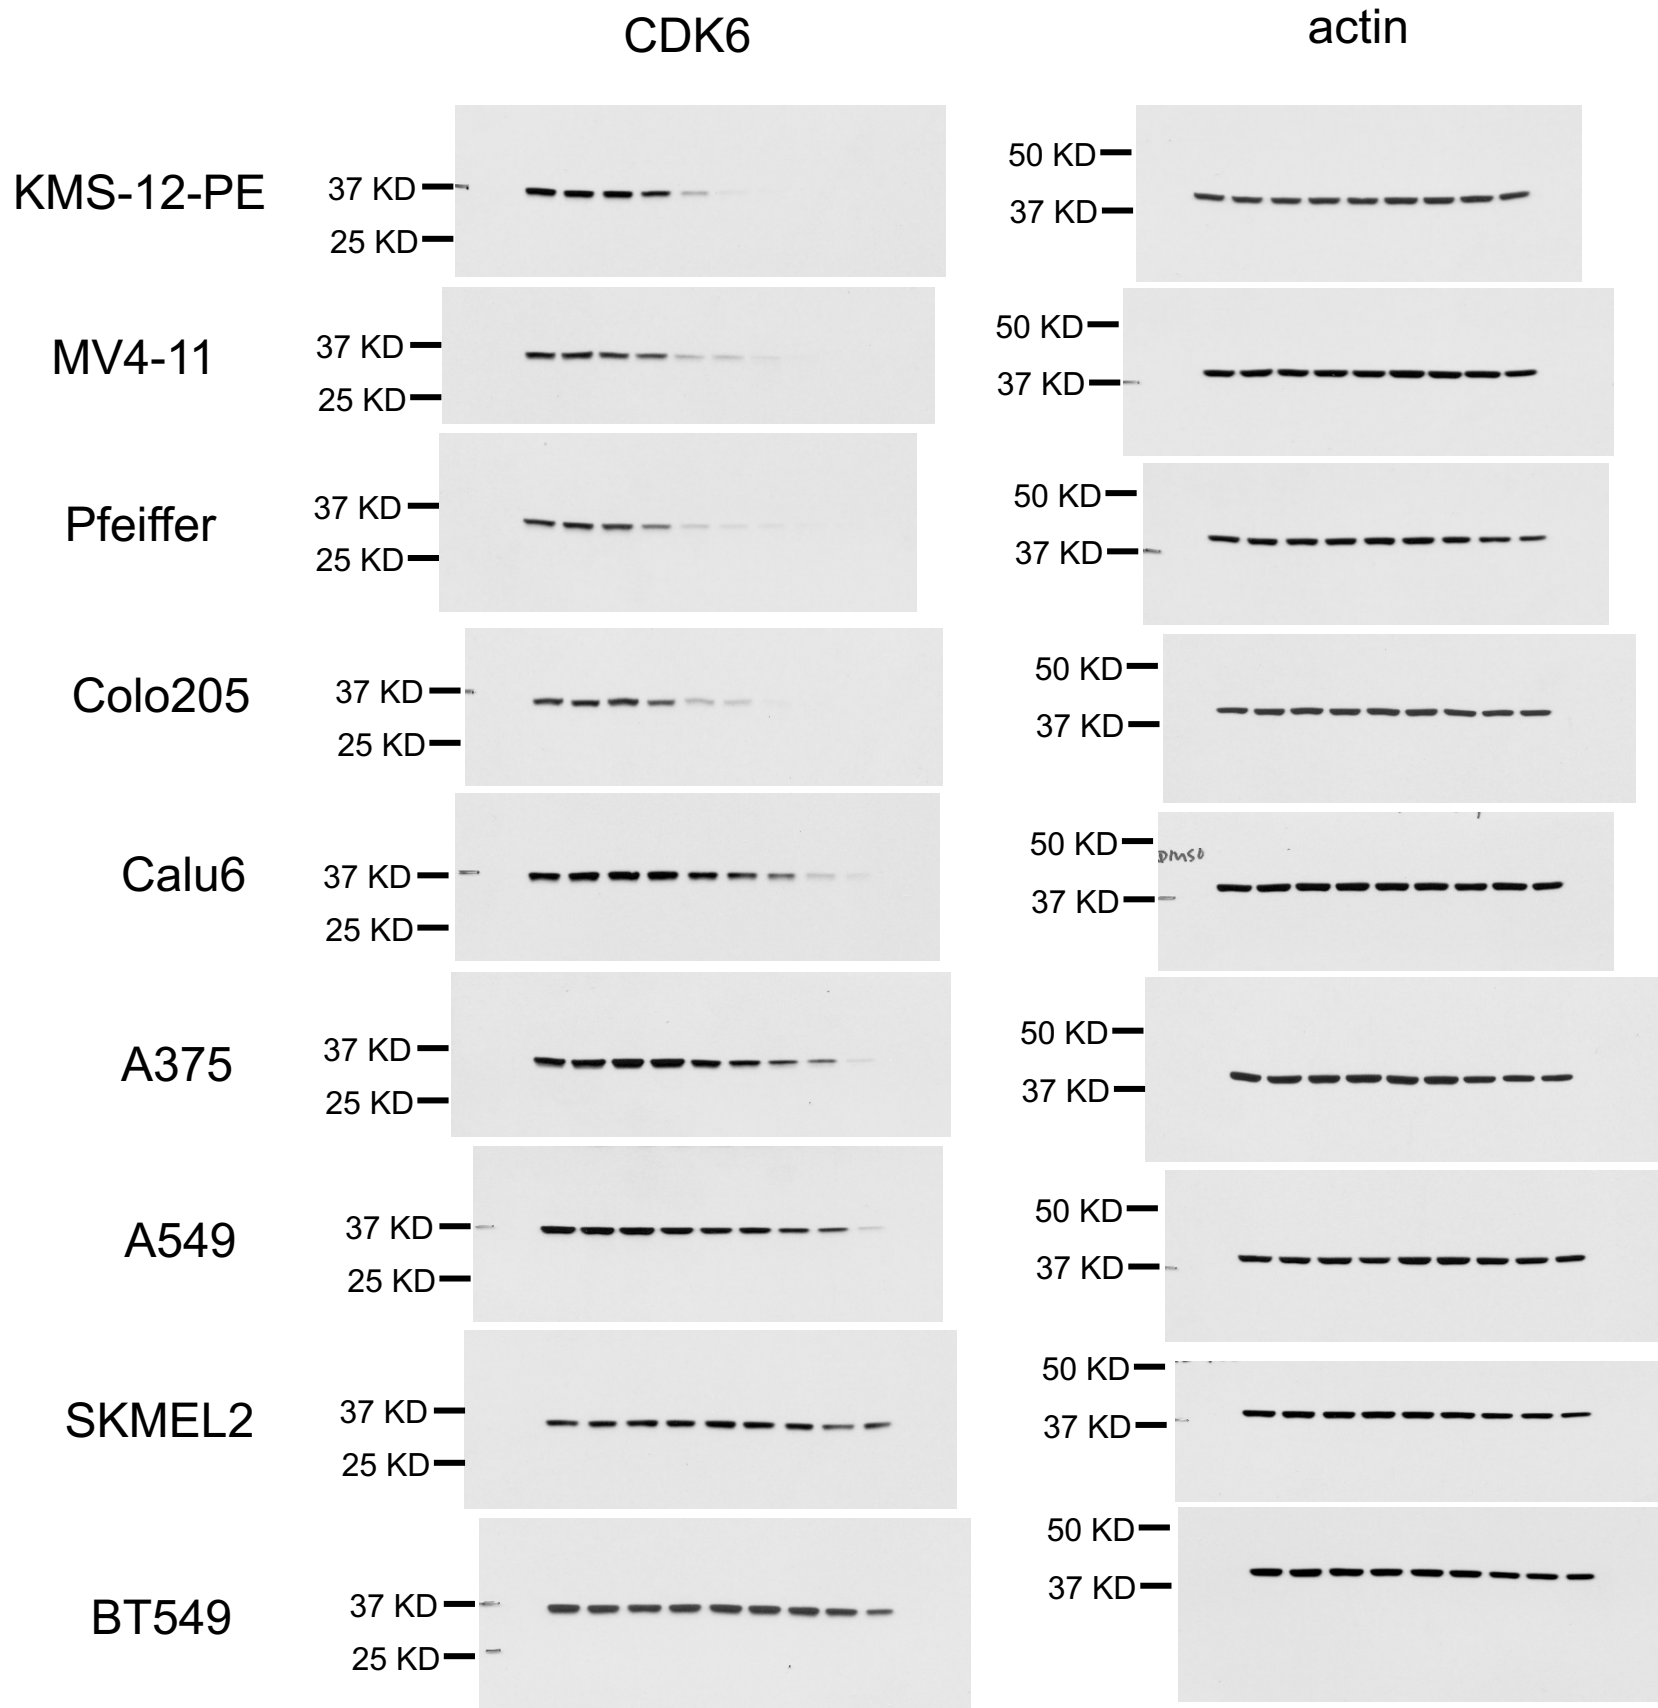

**Figure 7g**

KMS-12-PE

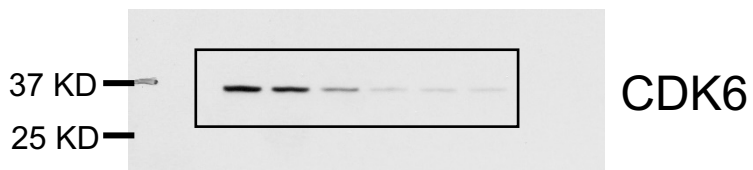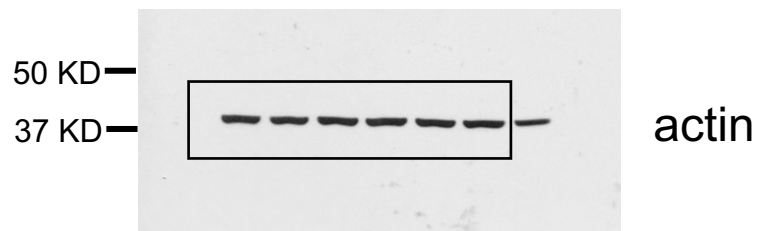

MV4-11

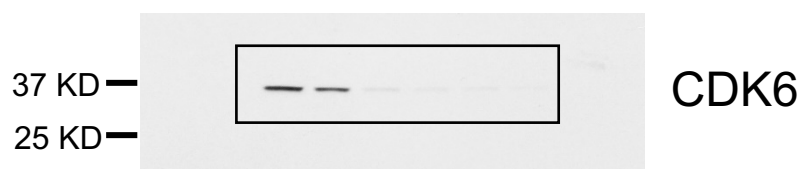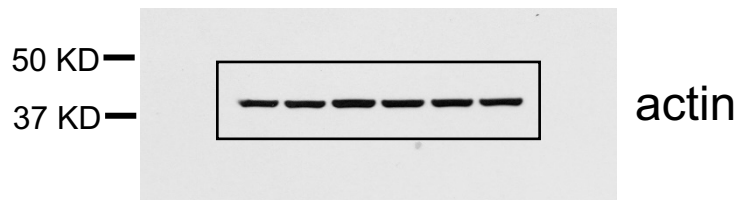

Calu6

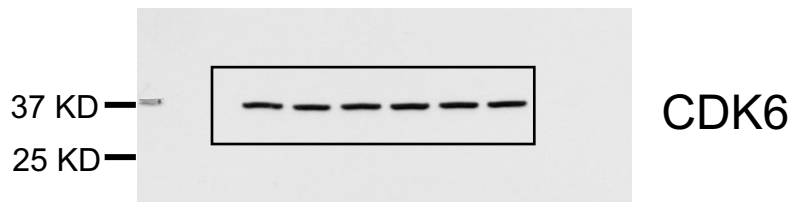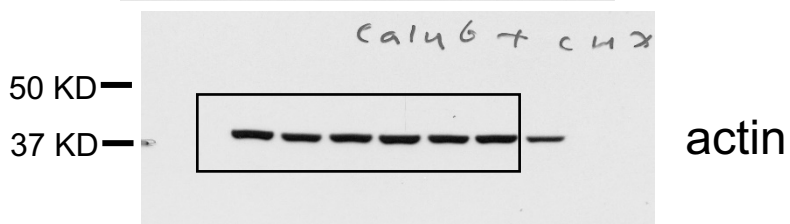

SKMEL2

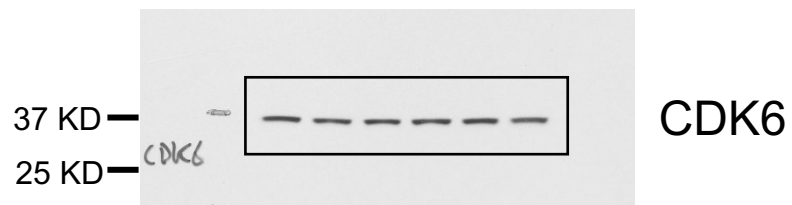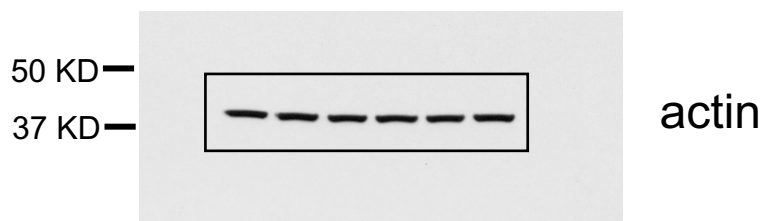

Pfeiffer

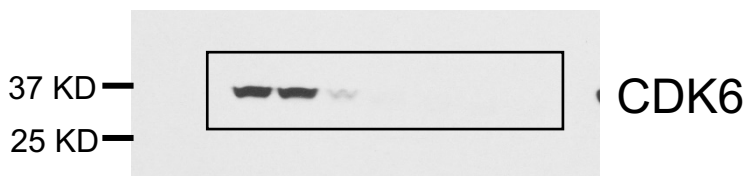

A375

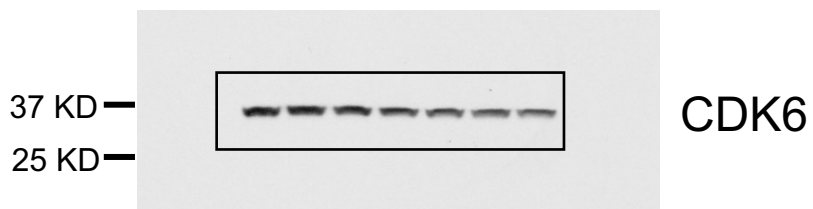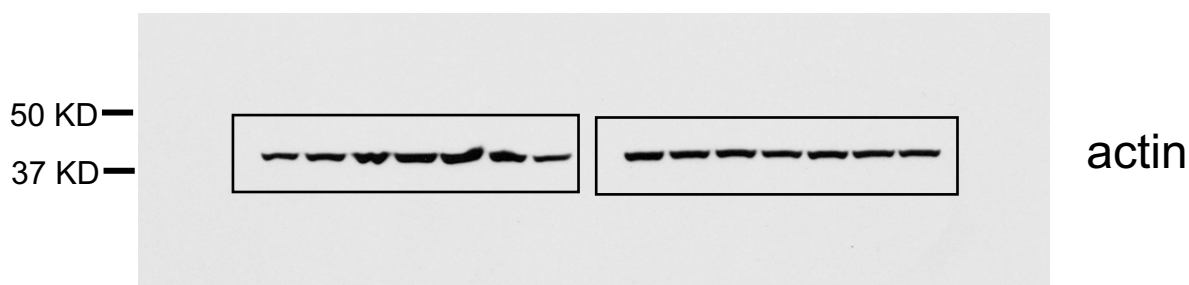



**Figure 7h**

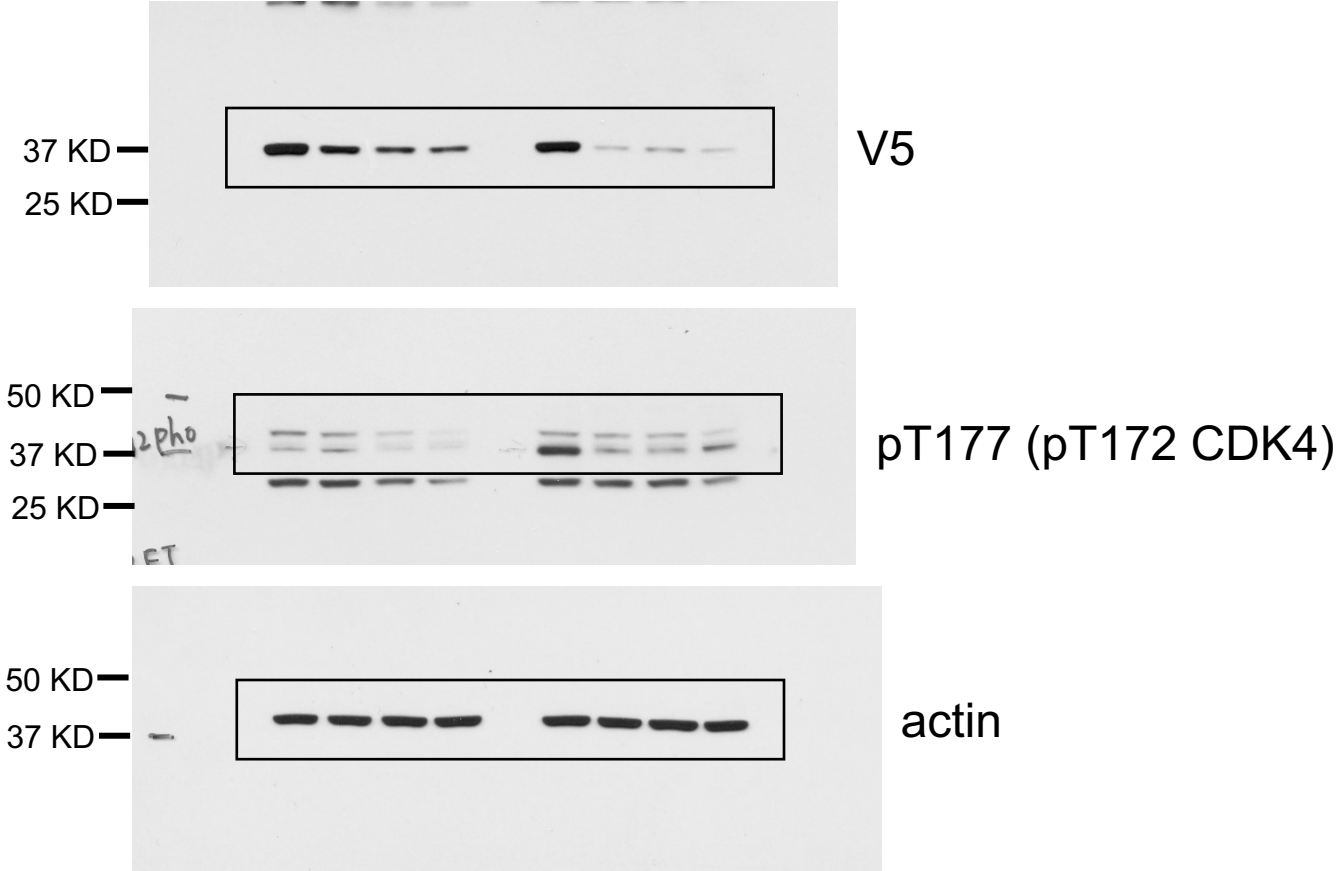

**Fig 7i**

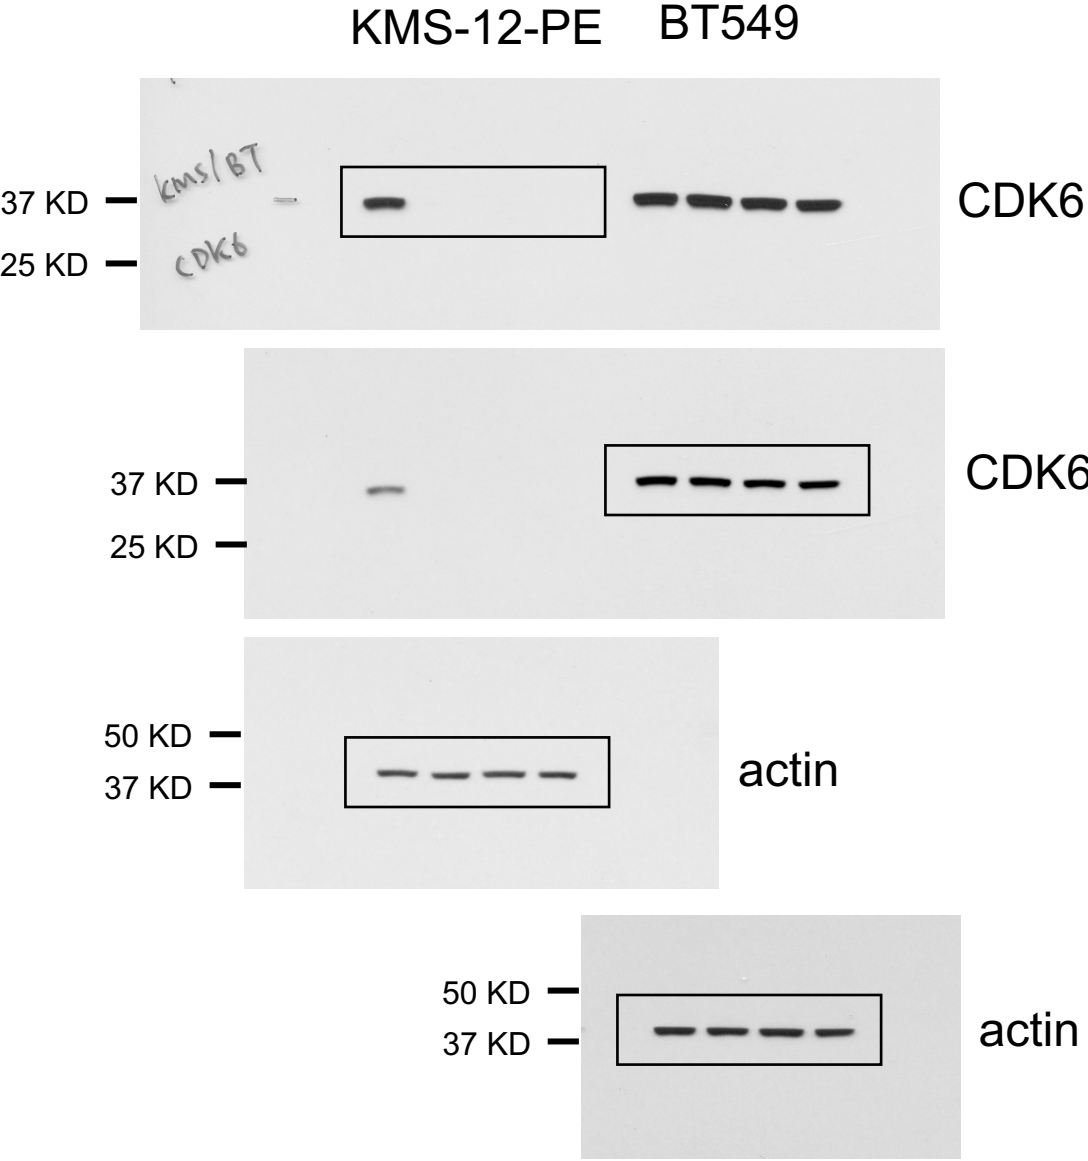

Supplement: NIHMS1684820-supplement-FIG_7__Source_Data_-_Immunoblots.pdf [file NIHMS1684820-supplement-FIG_7__Source_Data_-_Immunoblots.pdf]
