# Supplementary material
Source: PubMed Central journal article supplement (PMC8462800)
Supplement: NIHMS1684820-supplement-EXT_FIG_6__Source_Data_-_Immunoblots.pdf [file NIHMS1684820-supplement-EXT_FIG_6__Source_Data_-_Immunoblots.pdf]

# Extended Data Fig 6a

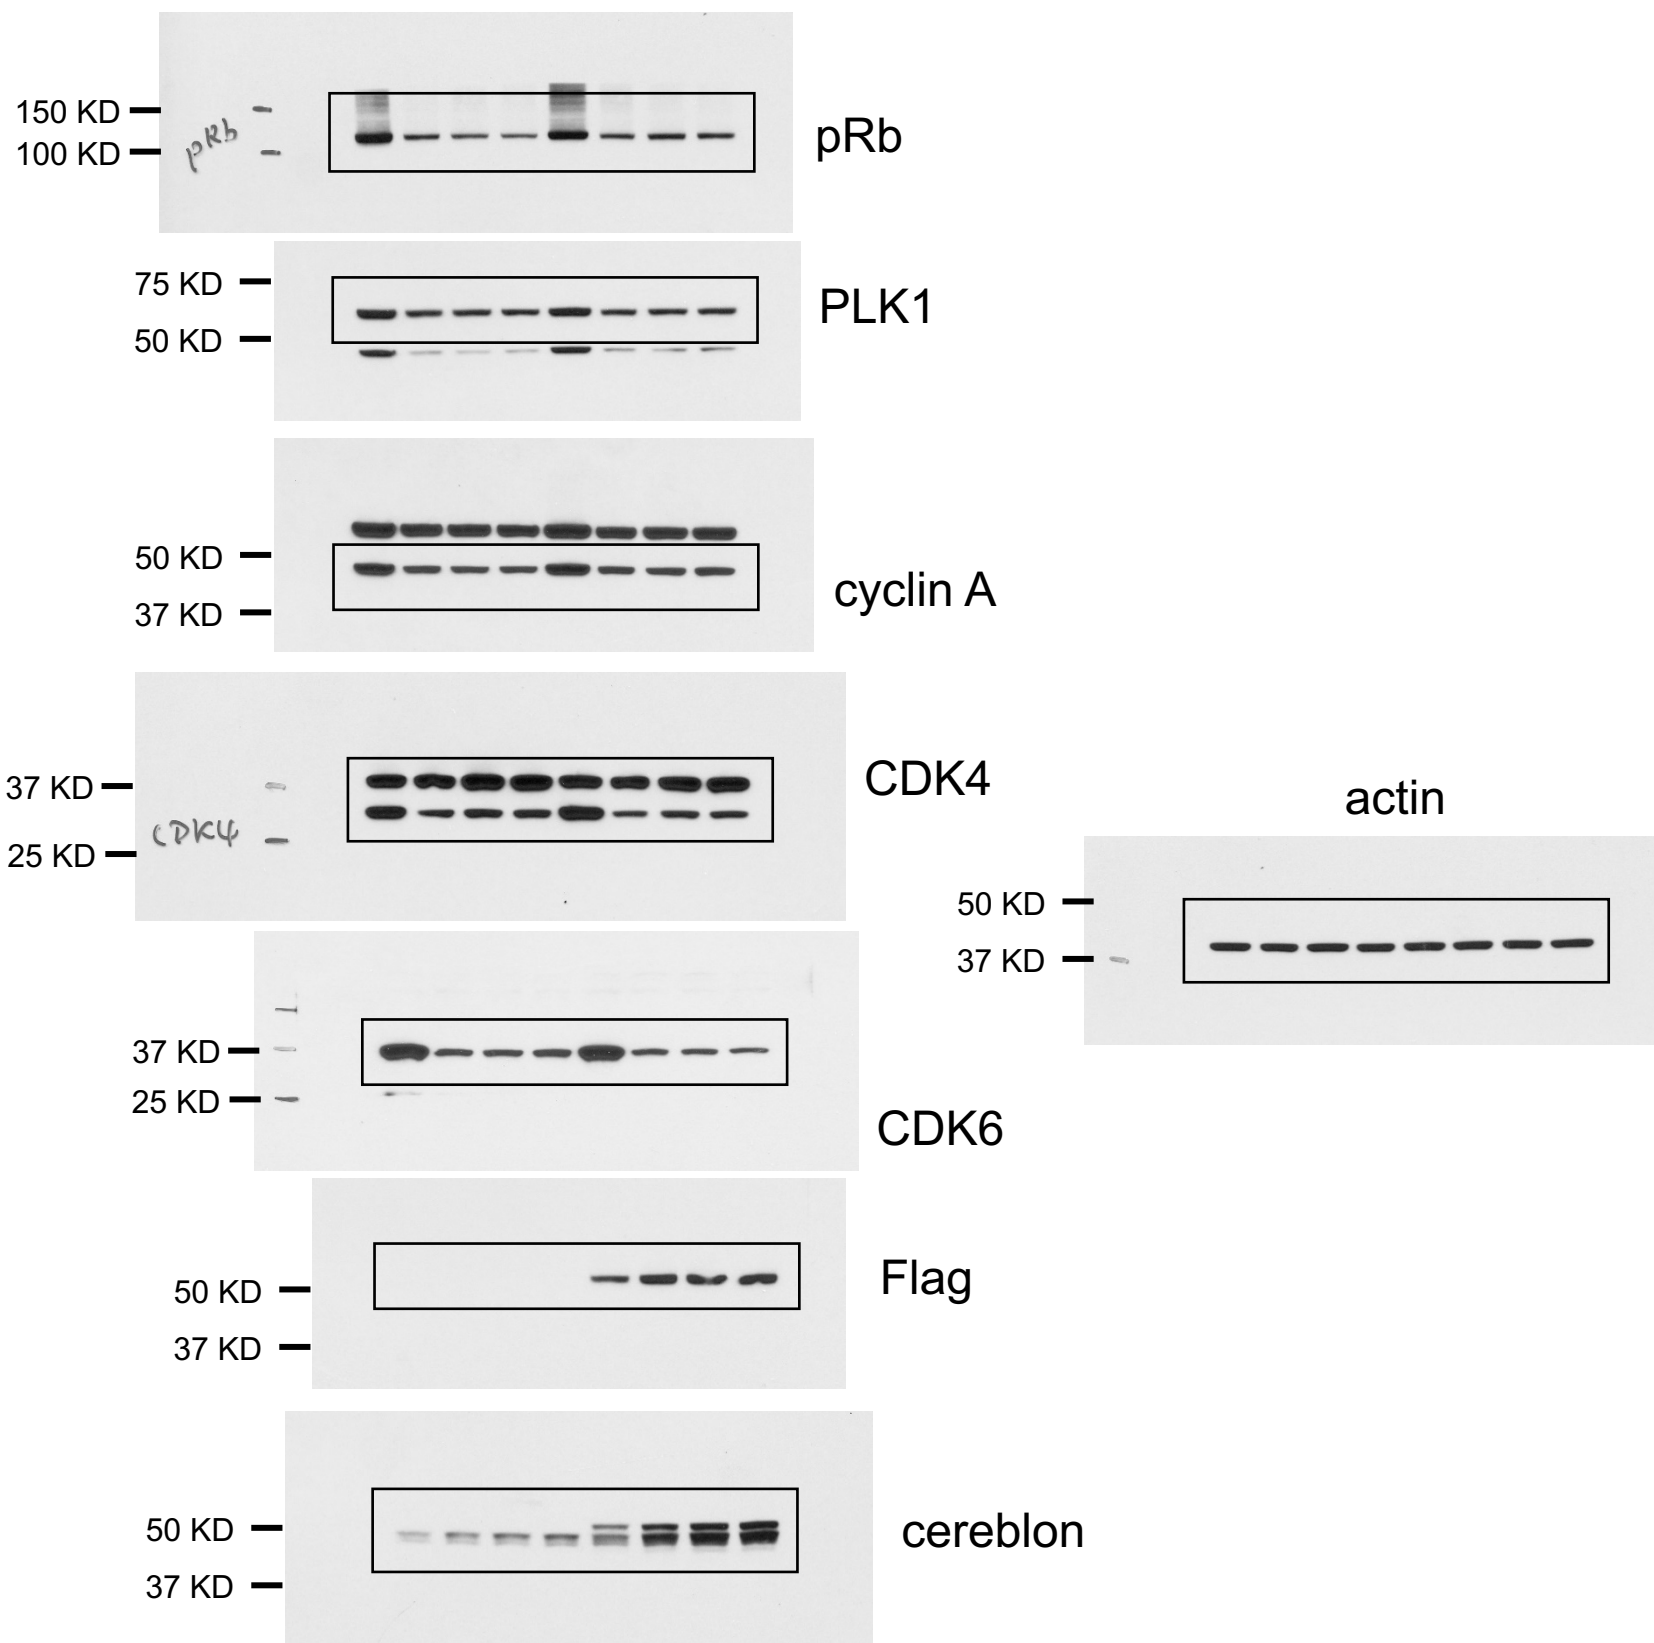

# Extended Data Fig 6b and 6c

MV4-11 A375

KMS-12-PE Calu6

MS140

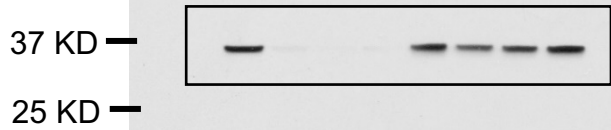

CDK6

MS140

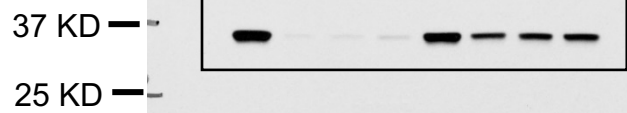

CDK6

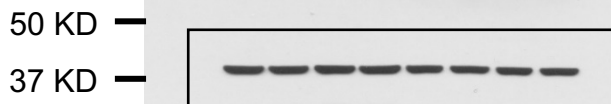

actin

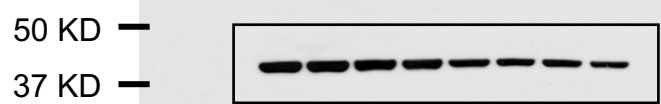

actin

YKL

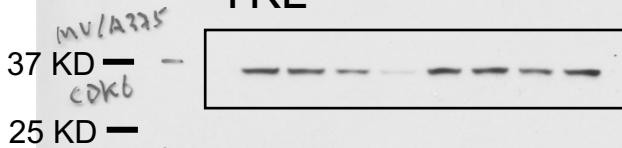

CDK6

YKL

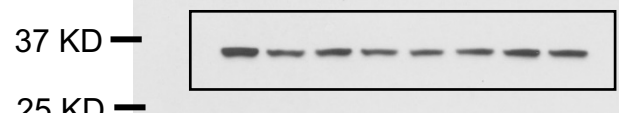

CDK6

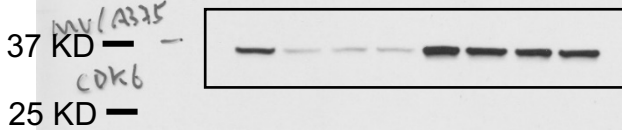

CDK6

BSJ

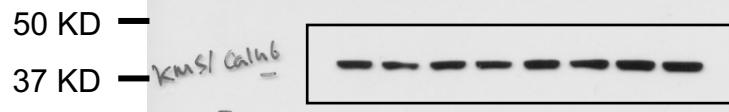

actin

YKL

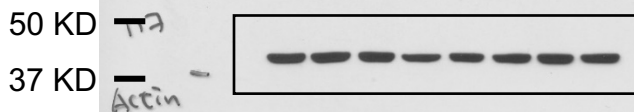

actin

BSJ

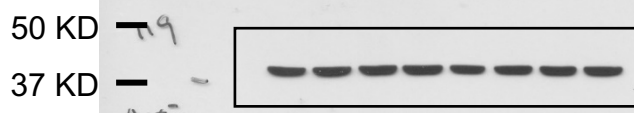

actin

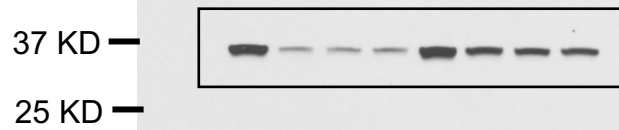

CDK6

BSJ

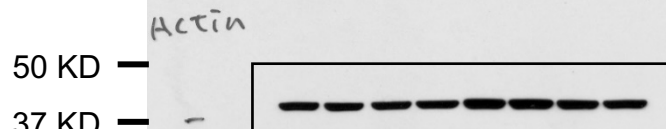

actin
