# Supplementary material
Source: PubMed Central journal article supplement (PMC8462800)
Supplement: NIHMS1684820-supplement-EXT_FIG_7__Source_Data_-_Immunoblots.pdf [file NIHMS1684820-supplement-EXT_FIG_7__Source_Data_-_Immunoblots.pdf]

# Extended Data Fig 7b

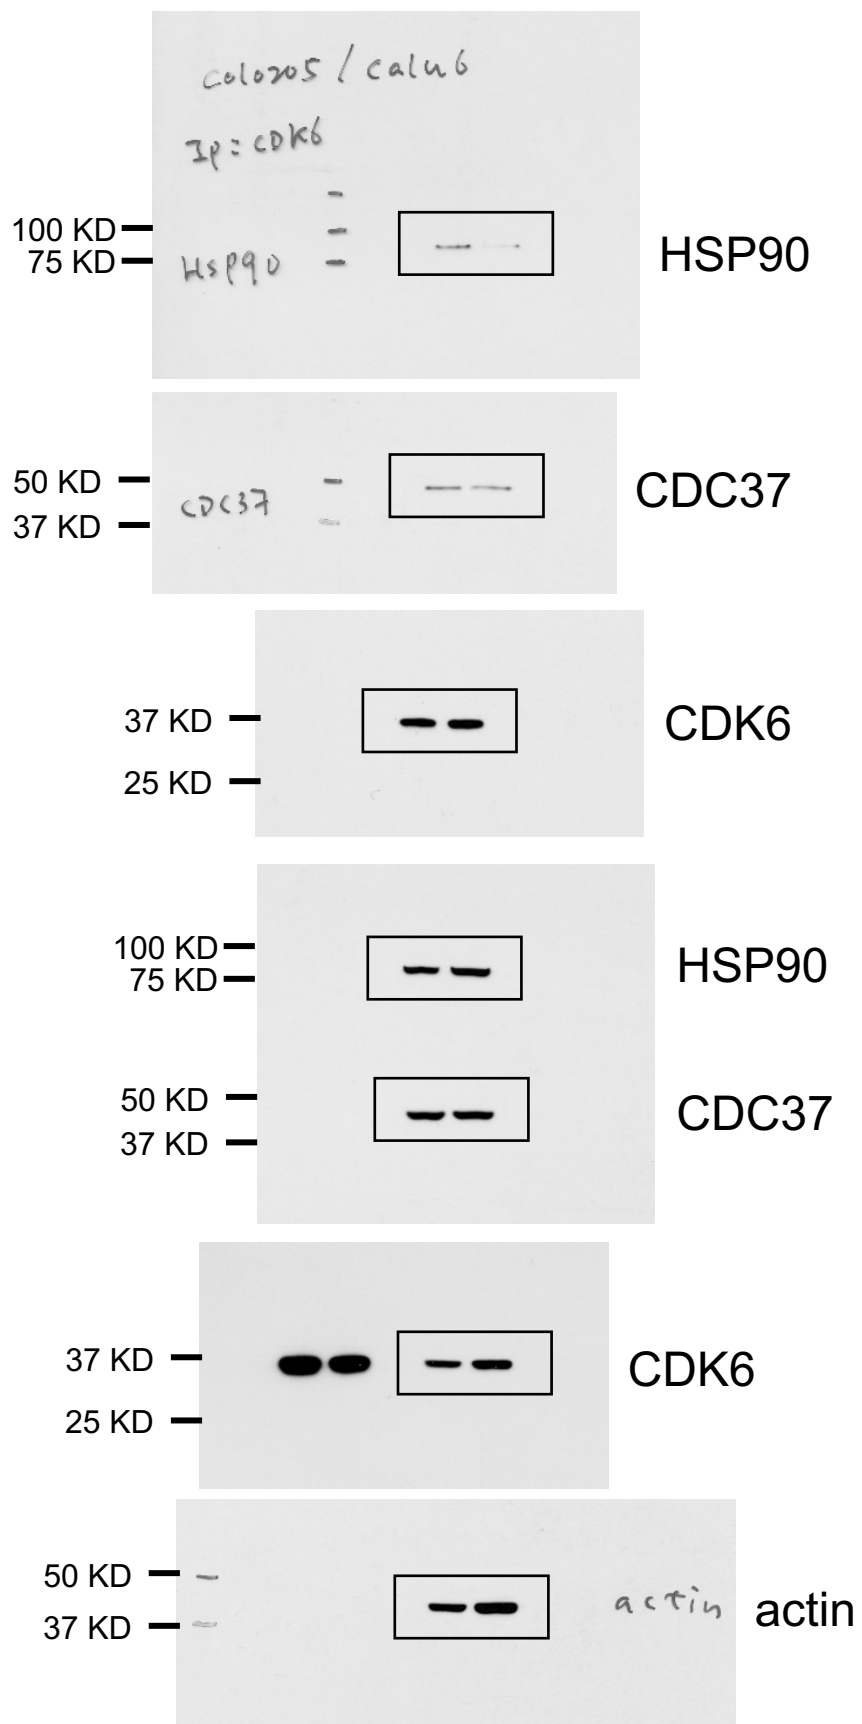

# Extended data Fig 7c

KMS-12-PE

Calu6

MV4-11

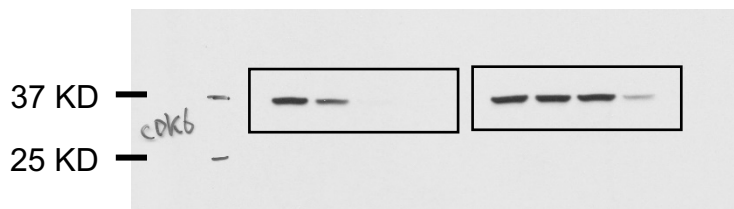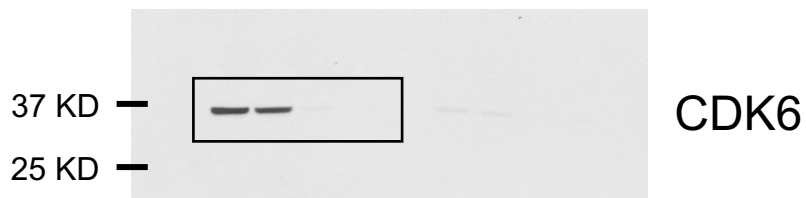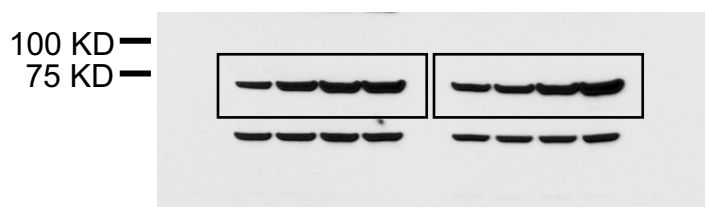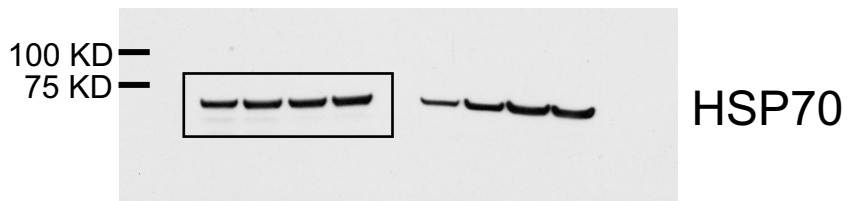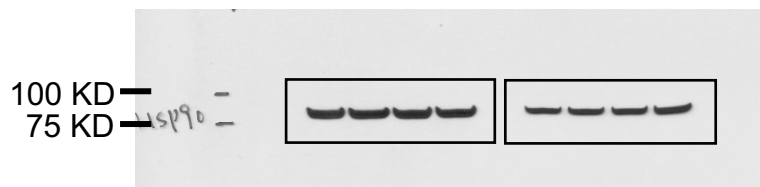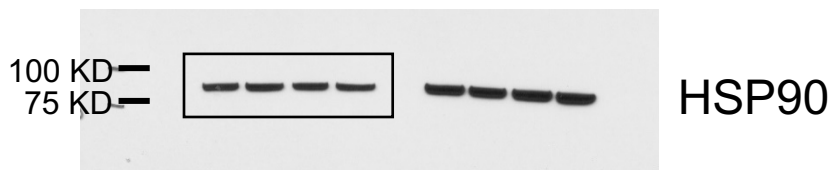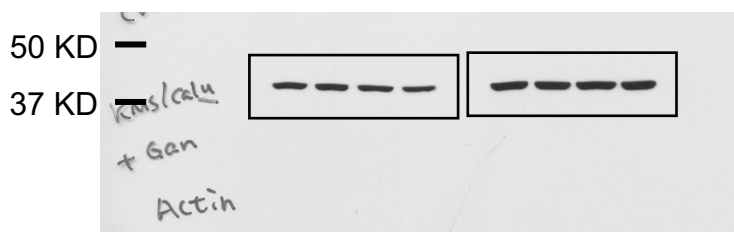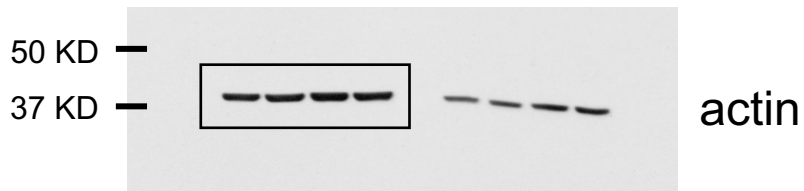

Pfeiffer

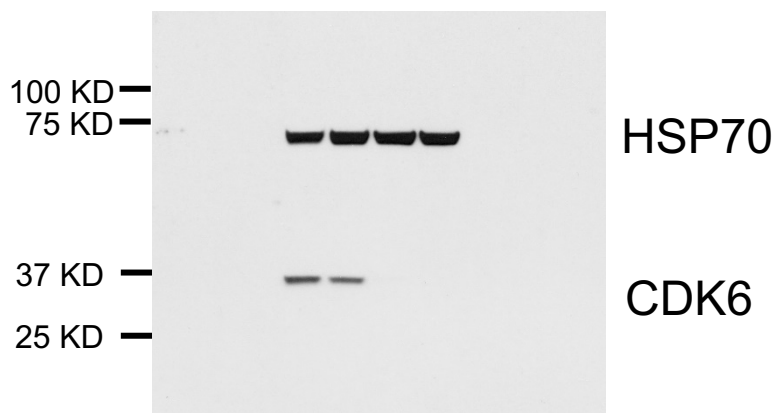

Pfeiffer

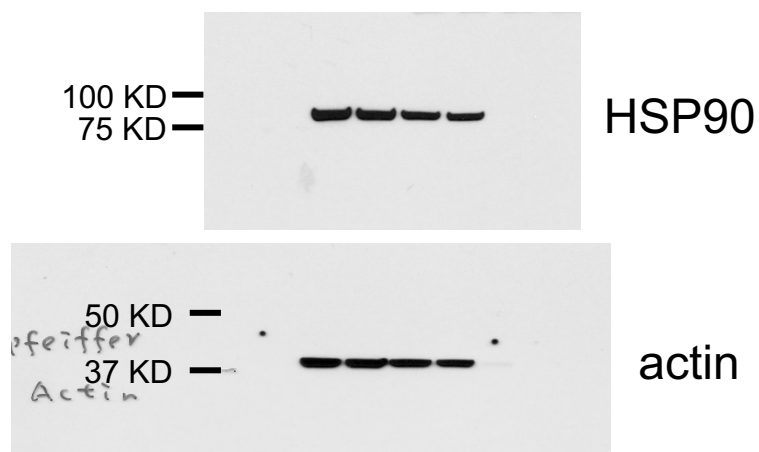

# Extended data Fig 7c

A549

A375

SKMEL2

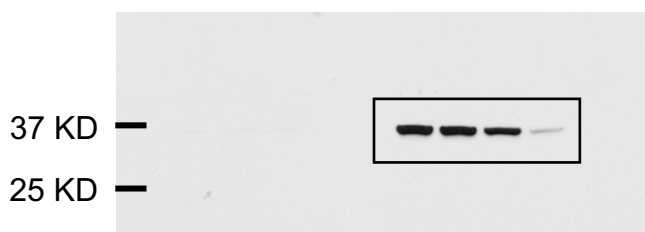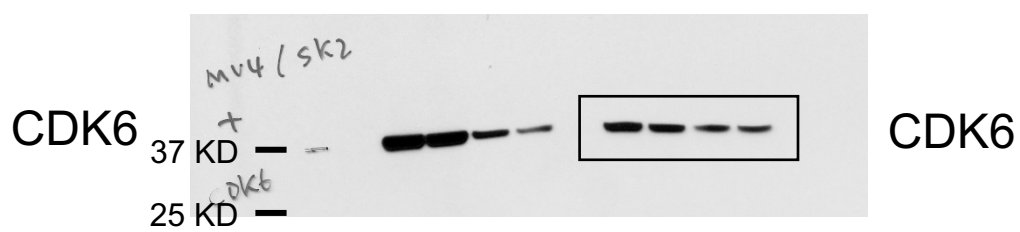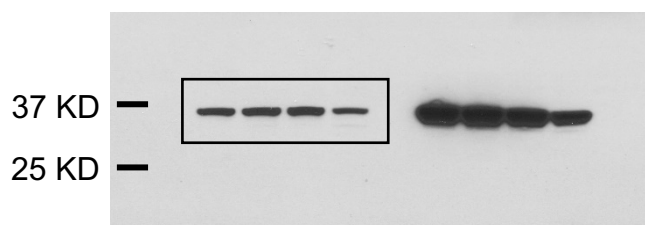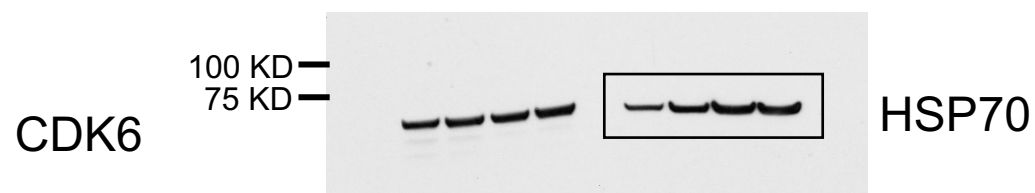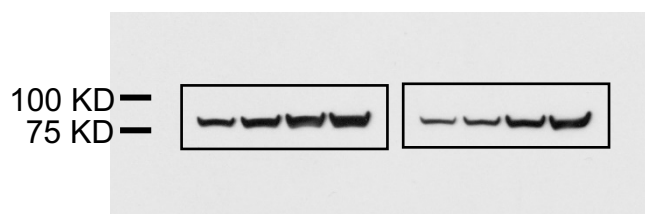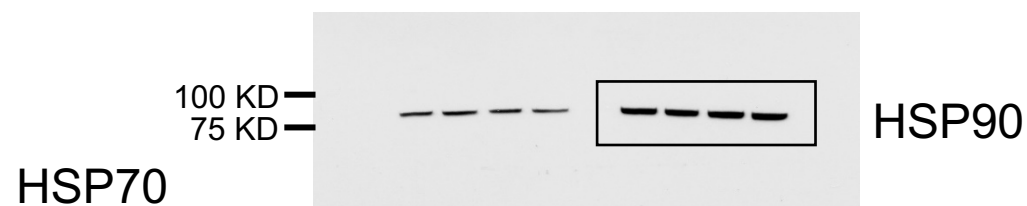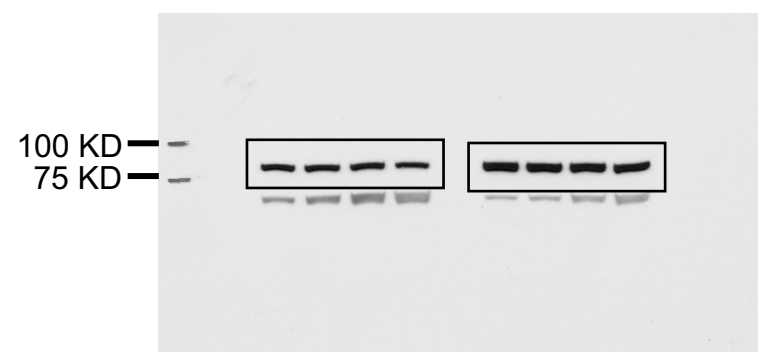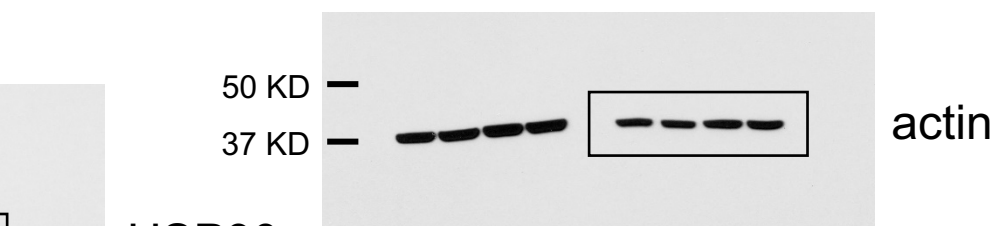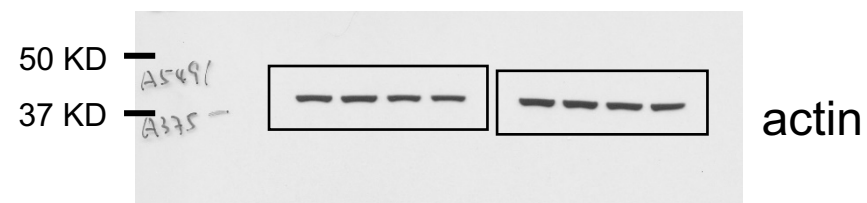

# Extended data Fig 7c

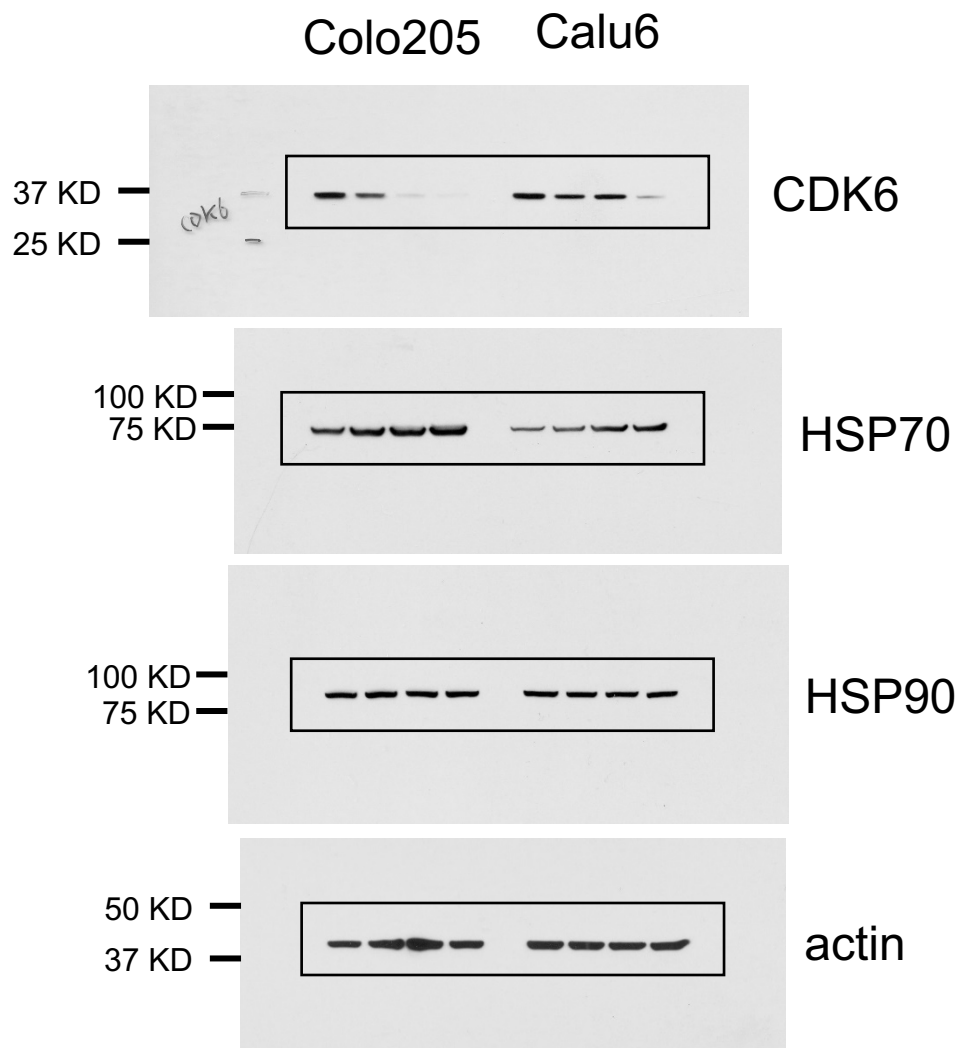

# Extended Data Fig 7d

KMS-12-PE

Calu6

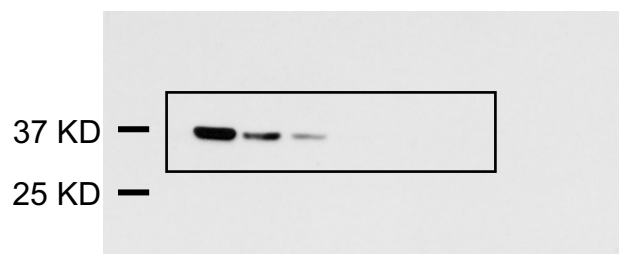

CDK6

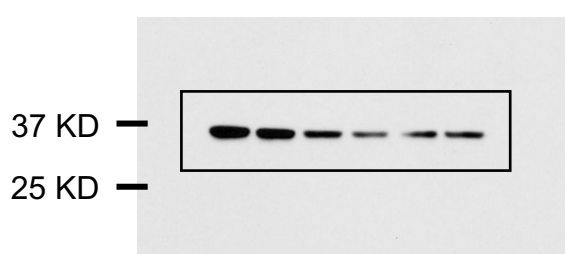

CDK6

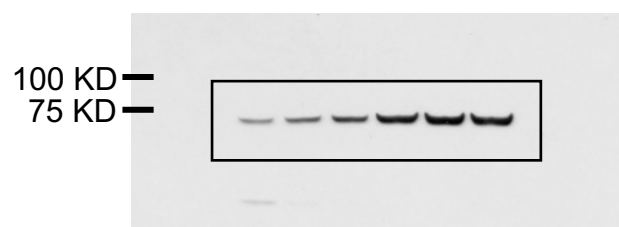

HSP70

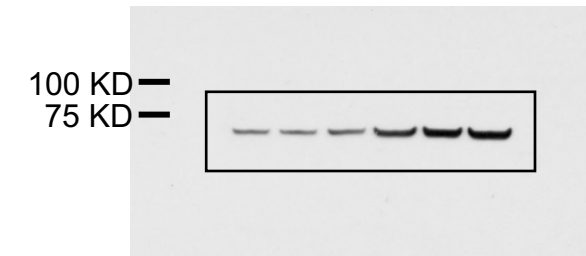

HSP70

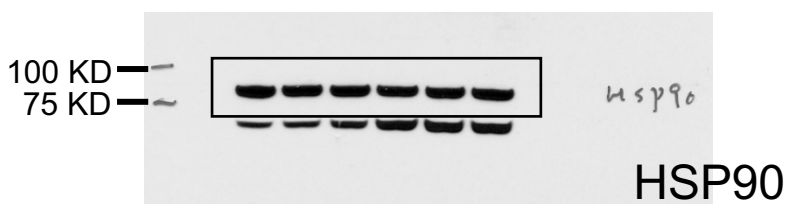

HSP90

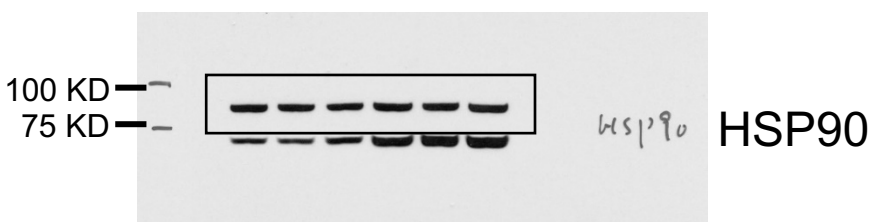

HSP90

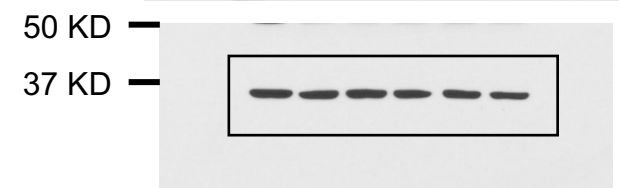

actin

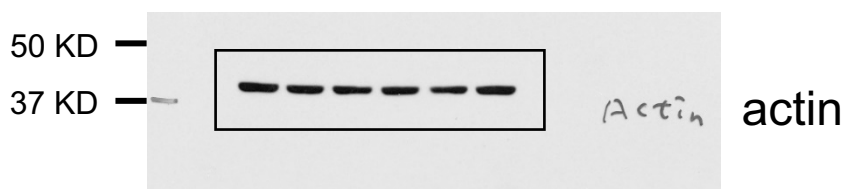

actin

# Extended Data Fig 7d

MV4-11

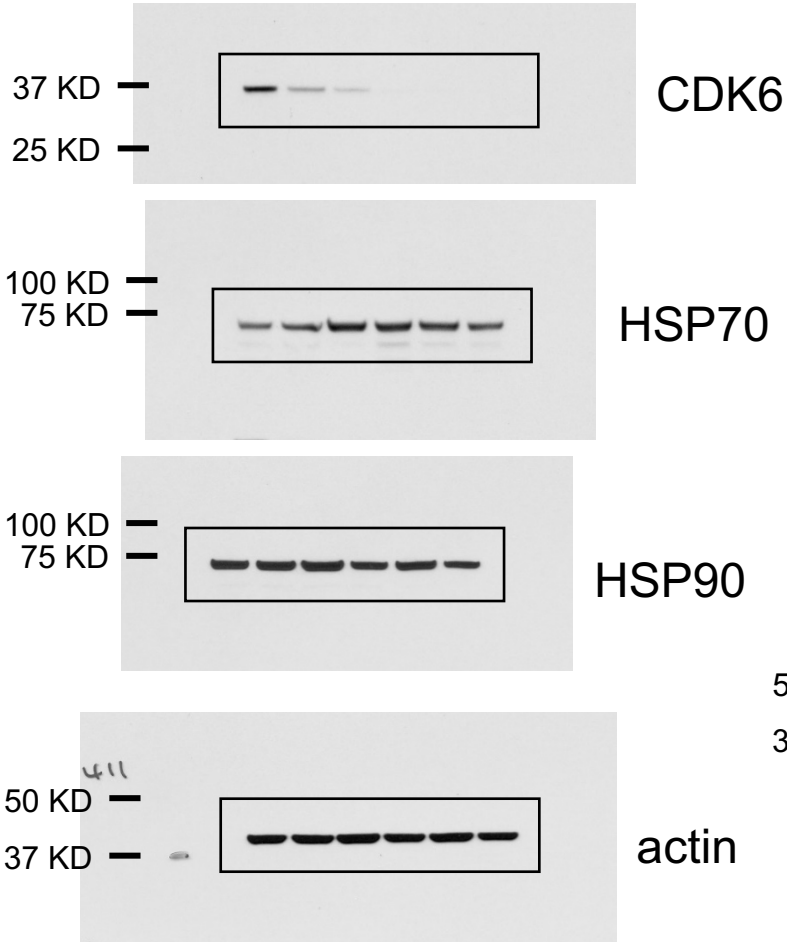

SKMEL2

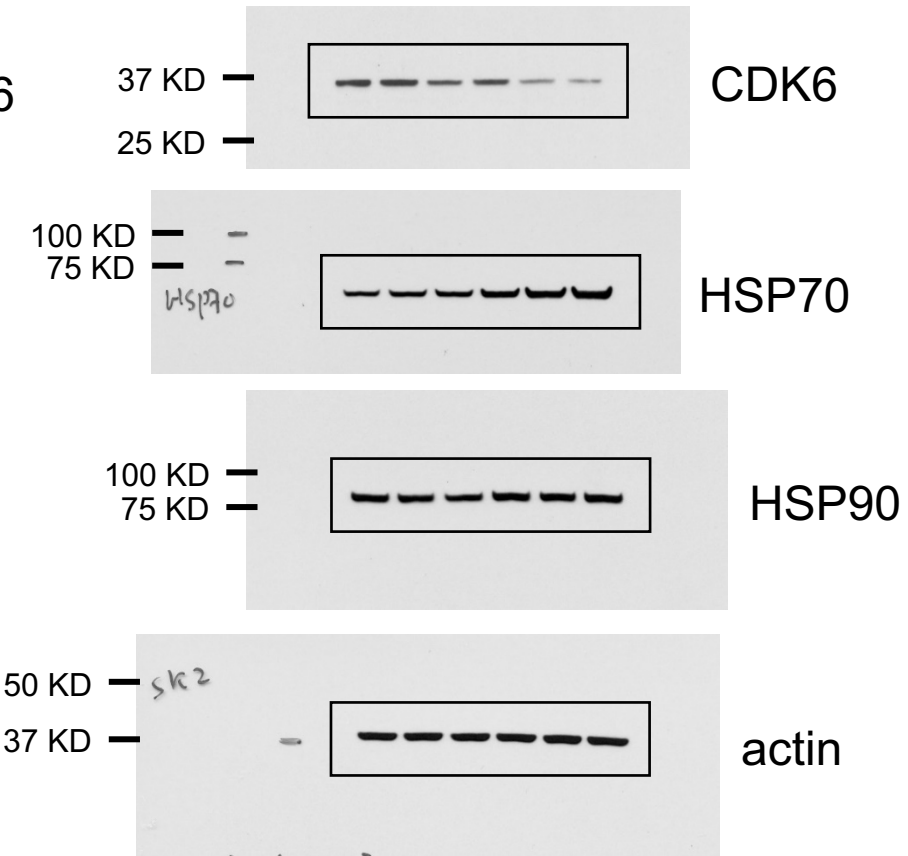

# Extended Data Fig 7e

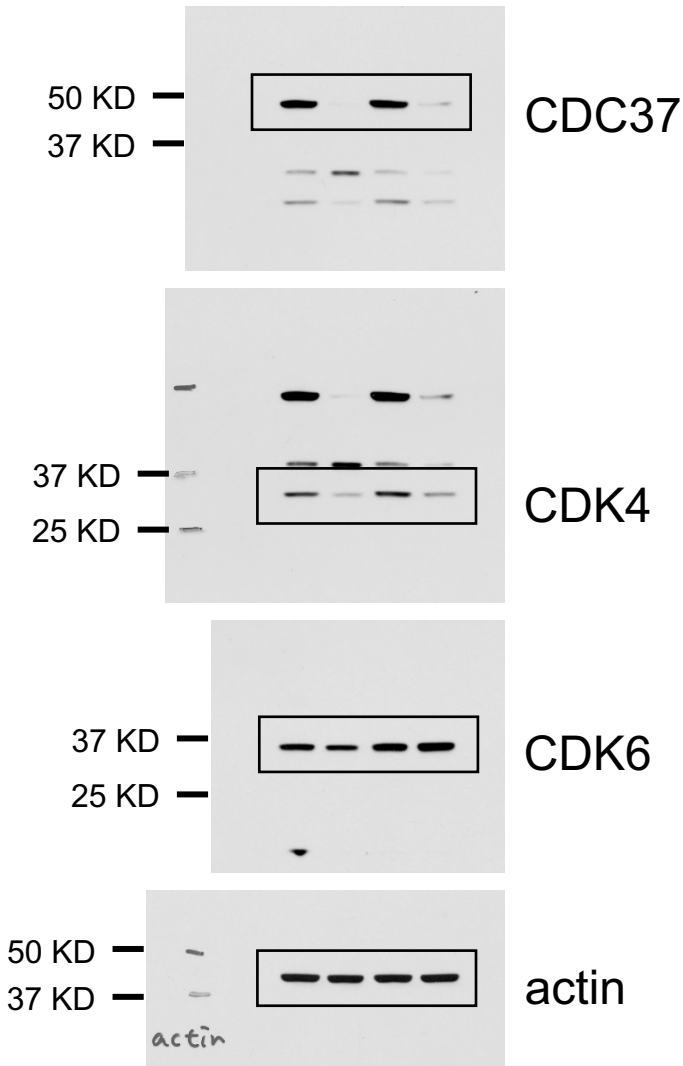

# Extended Data Fig 7f

Huh-7

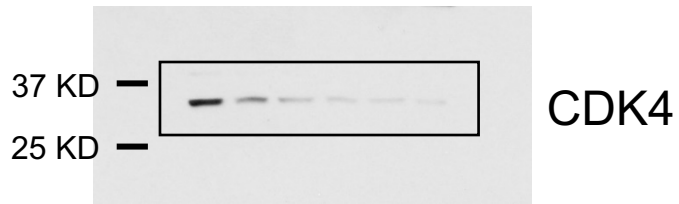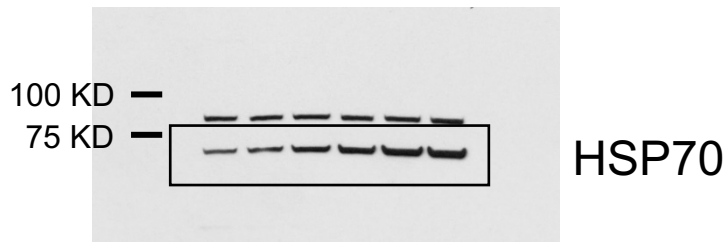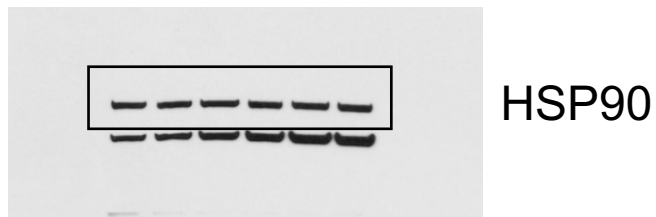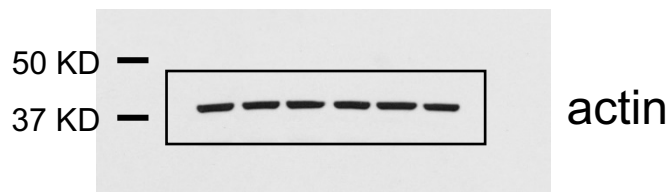

JeKo-1

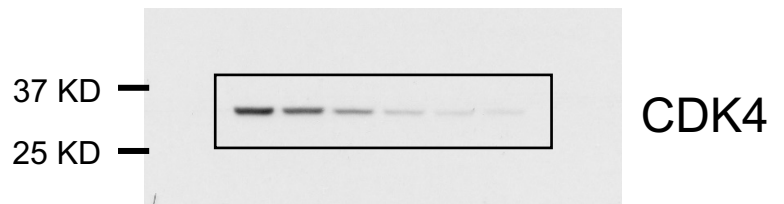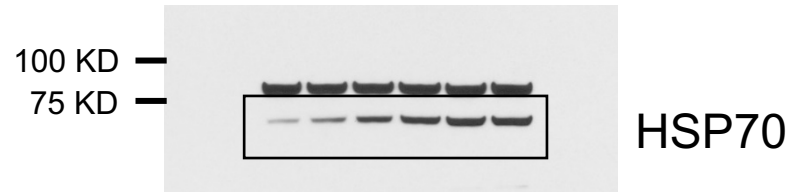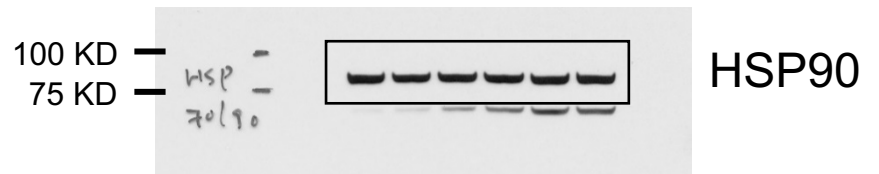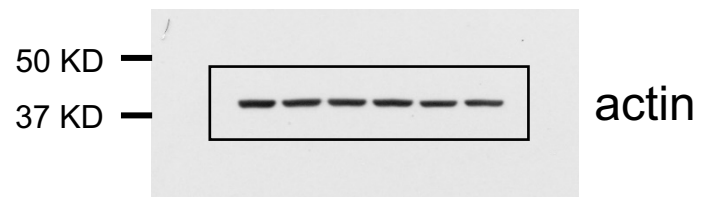

MCF7

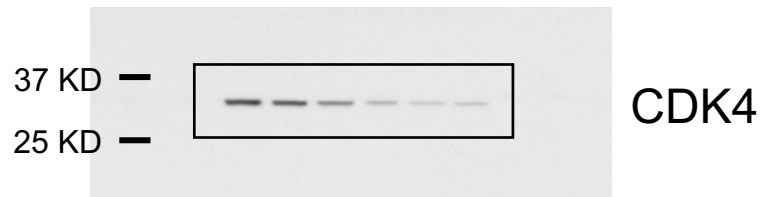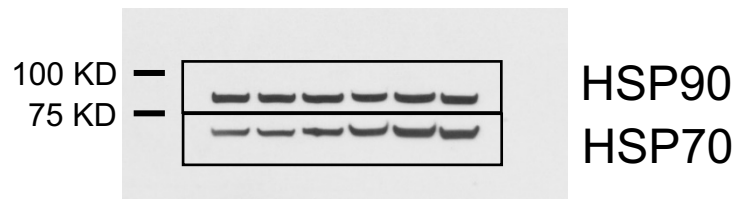

MCF7

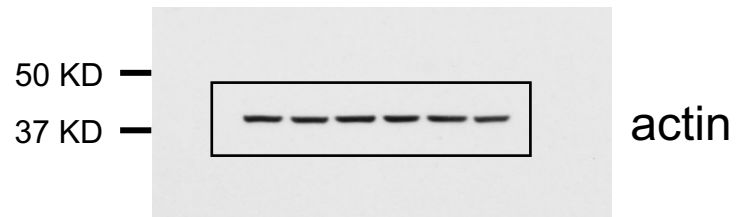



# Extended data Fig 7g and 7h

6h

KMS-12-PE Calu6

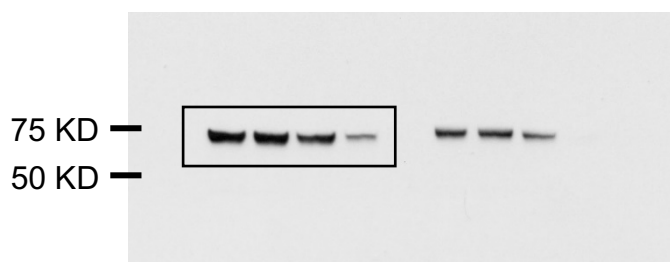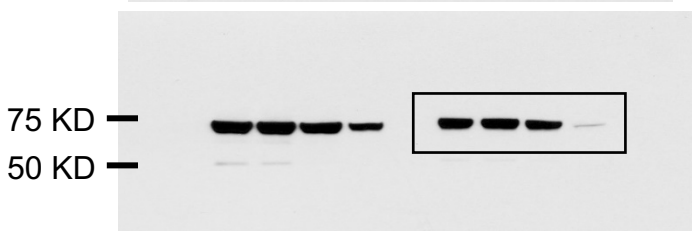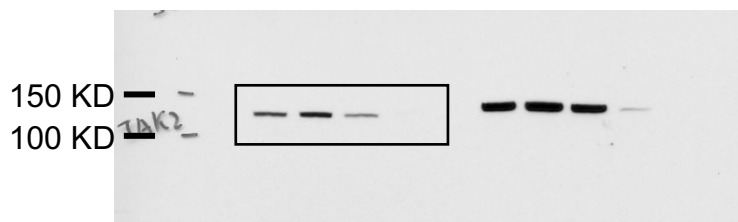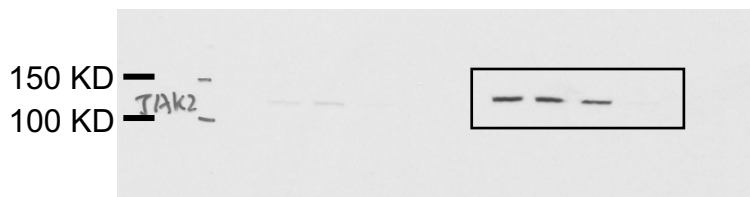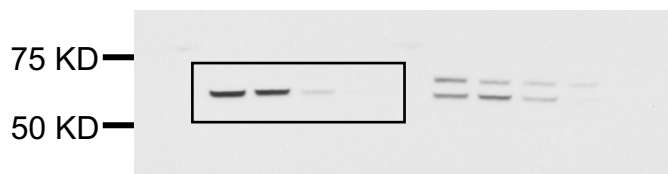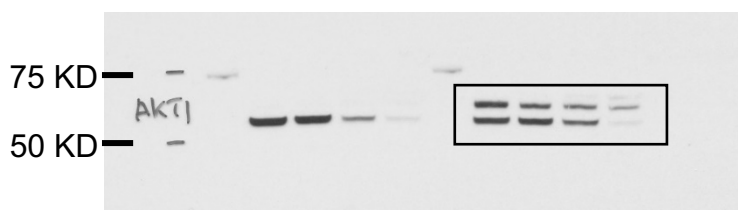

6i

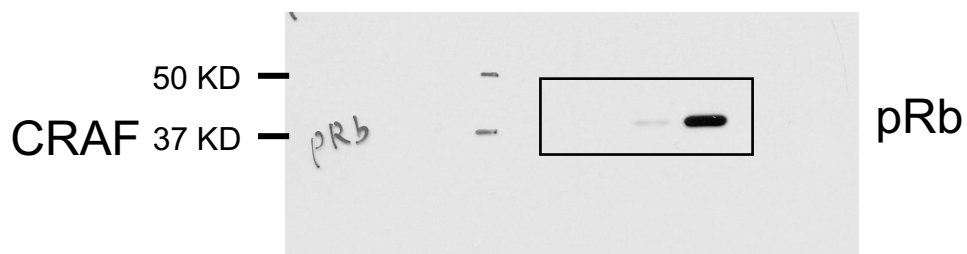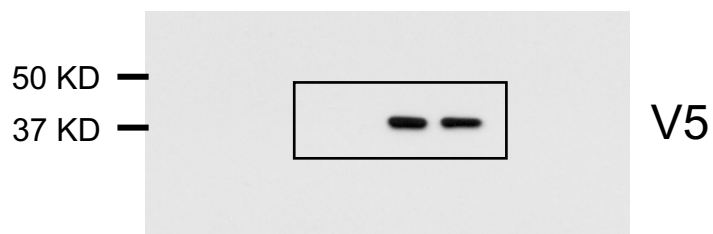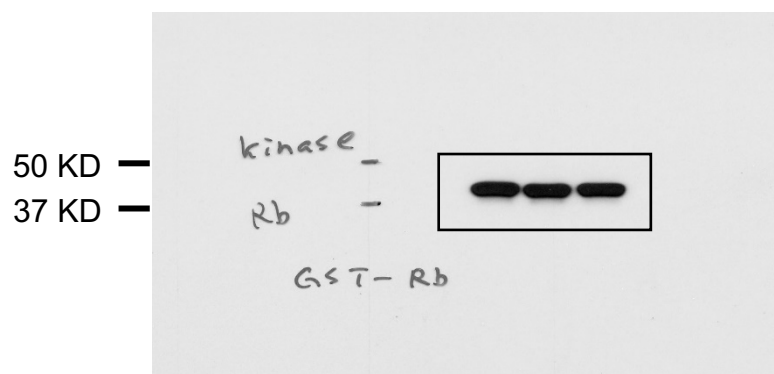

Rb (GST-Rb)
