# Supplementary material
Source: PubMed Central journal article supplement (PMC8462800)

# Extended Data Fig 1b and c

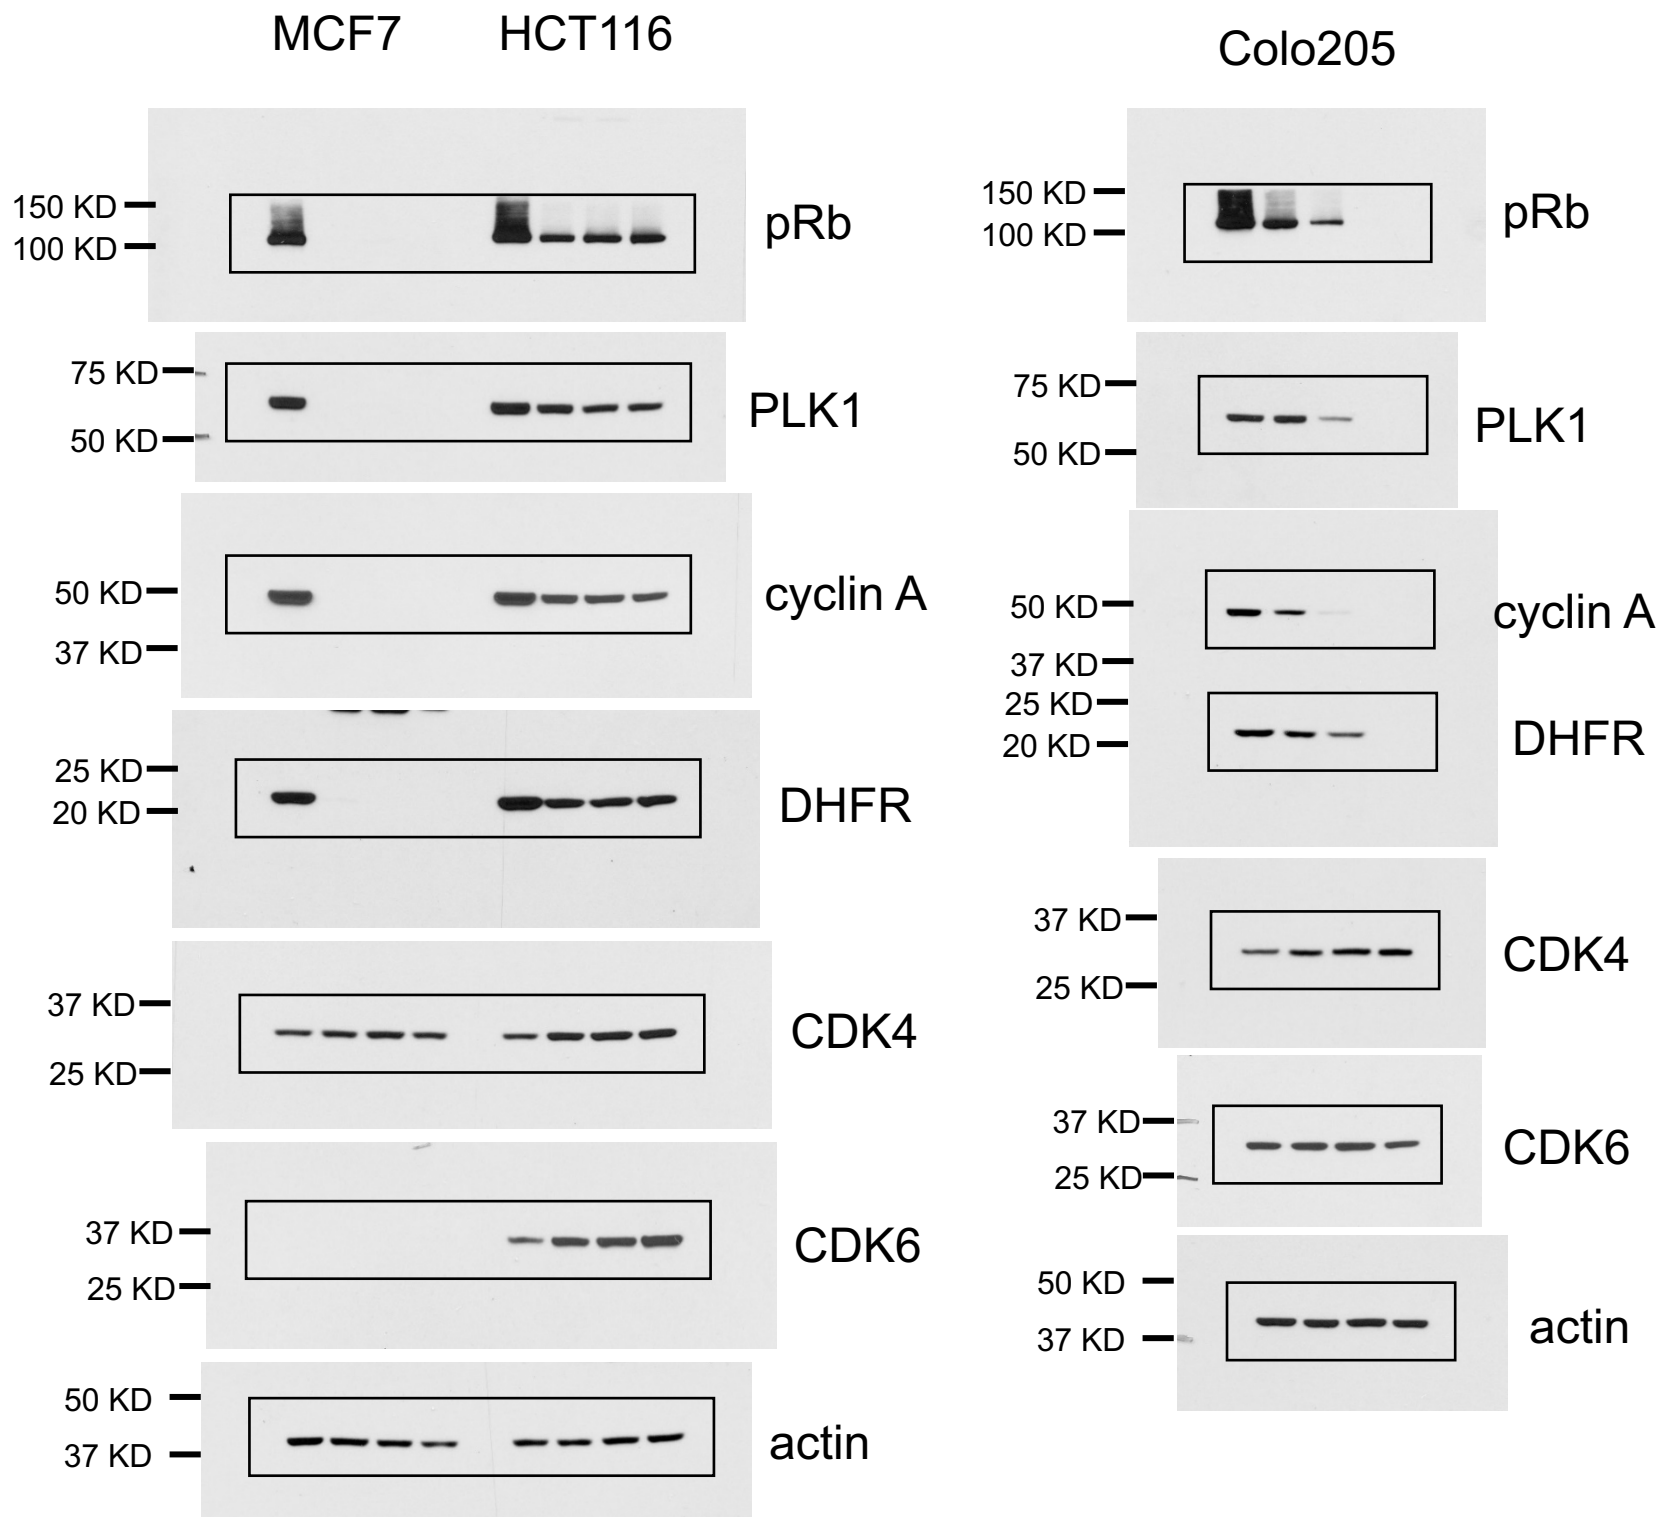

Supplement: NIHMS1684820-supplement-EXT_FIG_1__Source_Data_-_Immunoblots.pdf [file NIHMS1684820-supplement-EXT_FIG_1__Source_Data_-_Immunoblots.pdf]

# Extended Data Fig 2a

H358

A549

Calu6

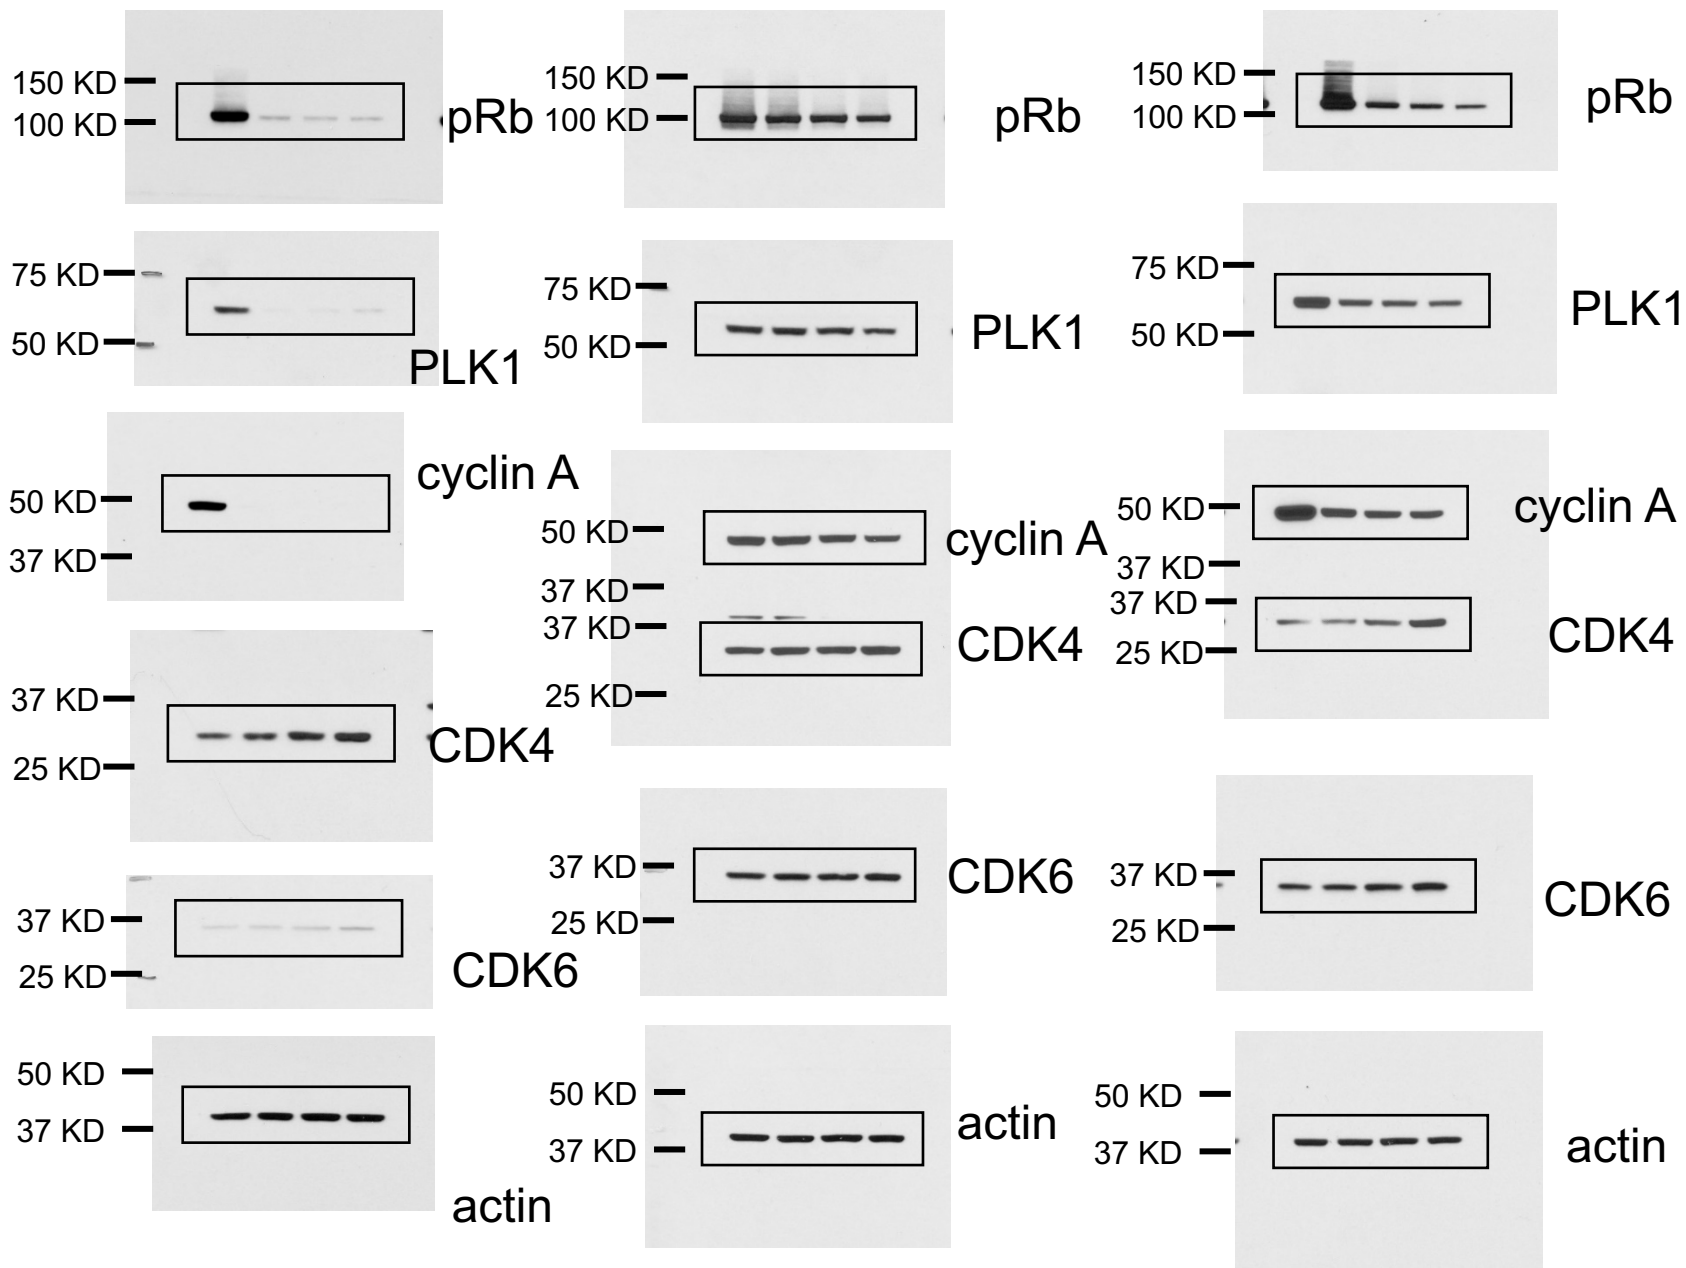

Supplement: NIHMS1684820-supplement-EXT_FIG_2__Source_Data_-_Immunoblots.pdf [file NIHMS1684820-supplement-EXT_FIG_2__Source_Data_-_Immunoblots.pdf]

# Extended Data Fig 3a

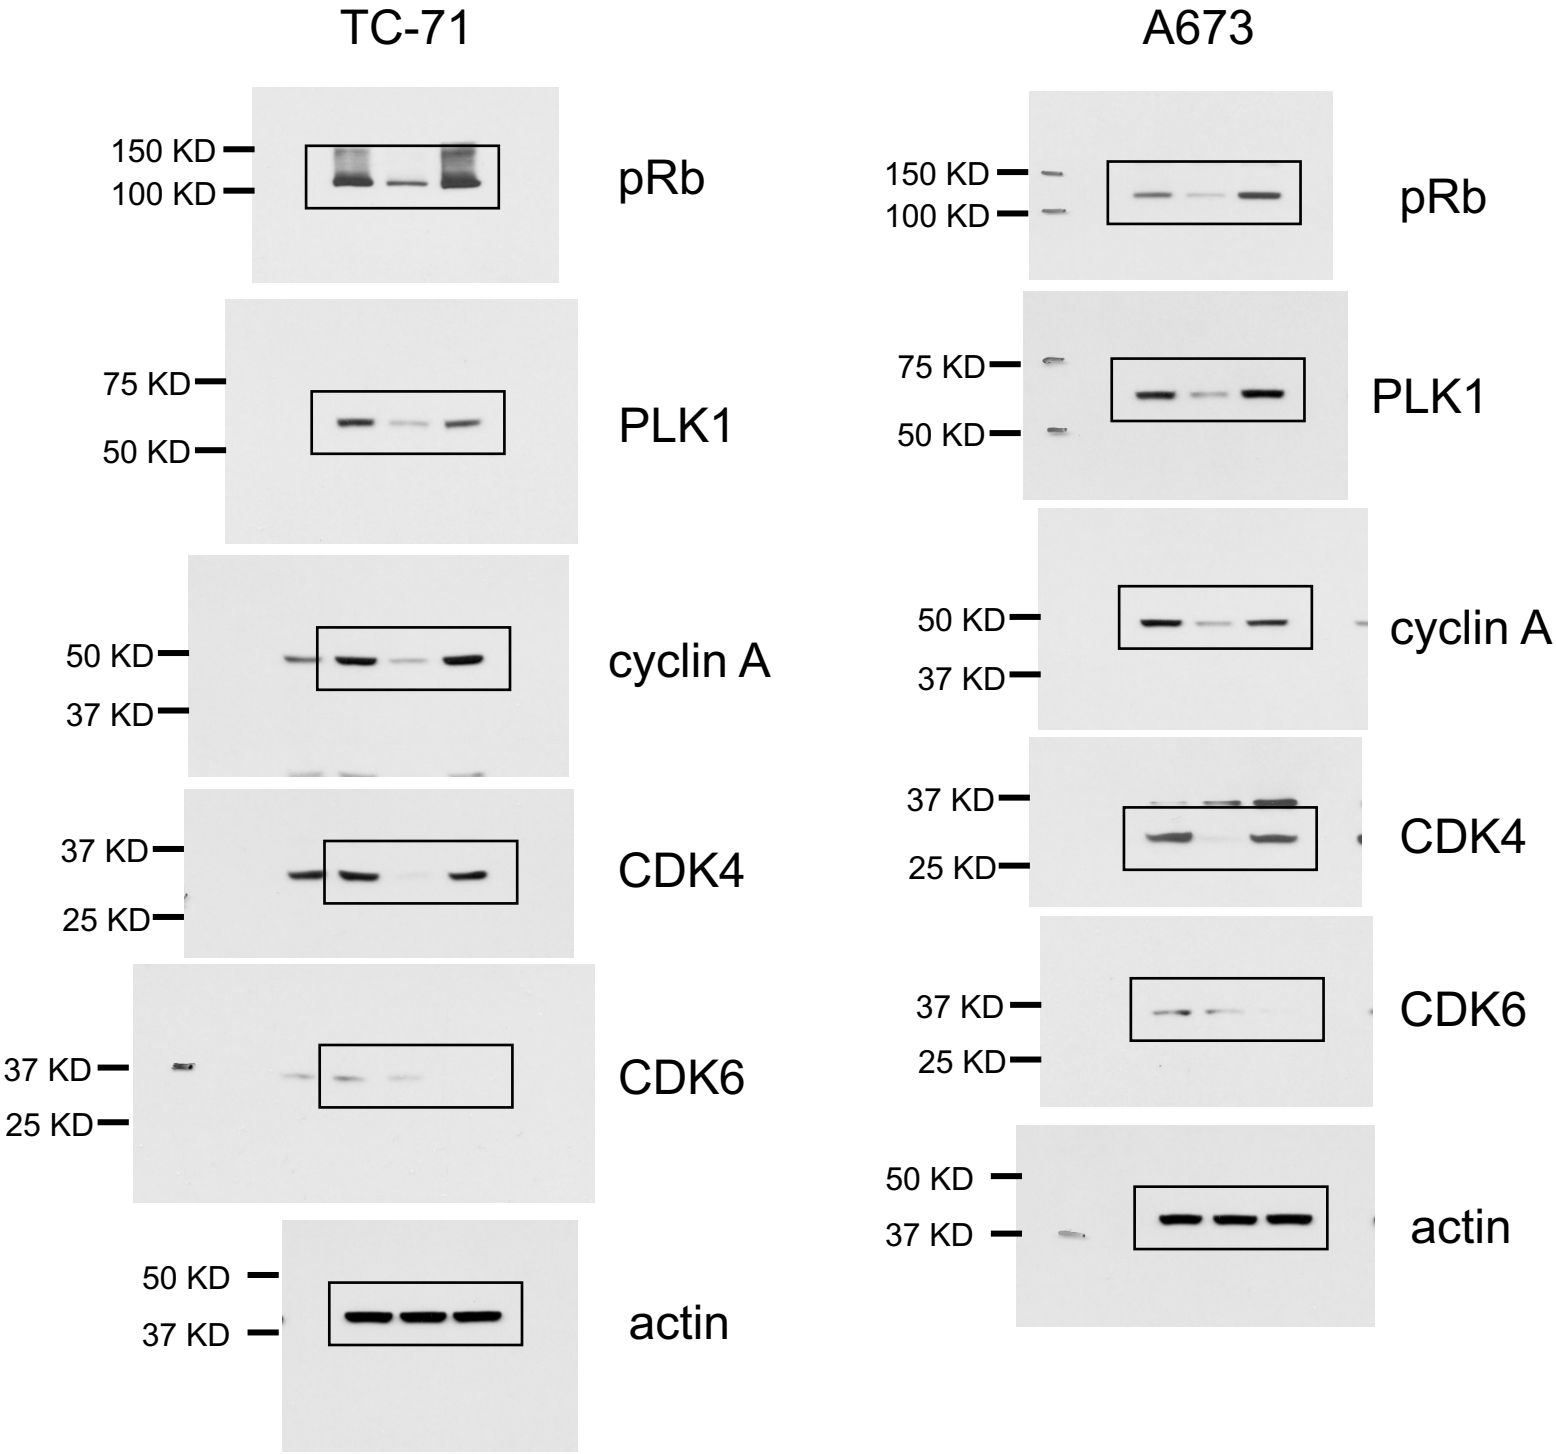

Supplement: NIHMS1684820-supplement-EXT_FIG_3__Source_Data_-_Immunoblots.pdf [file NIHMS1684820-supplement-EXT_FIG_3__Source_Data_-_Immunoblots.pdf]

# Extended Data Fig 4b

4b

T47D

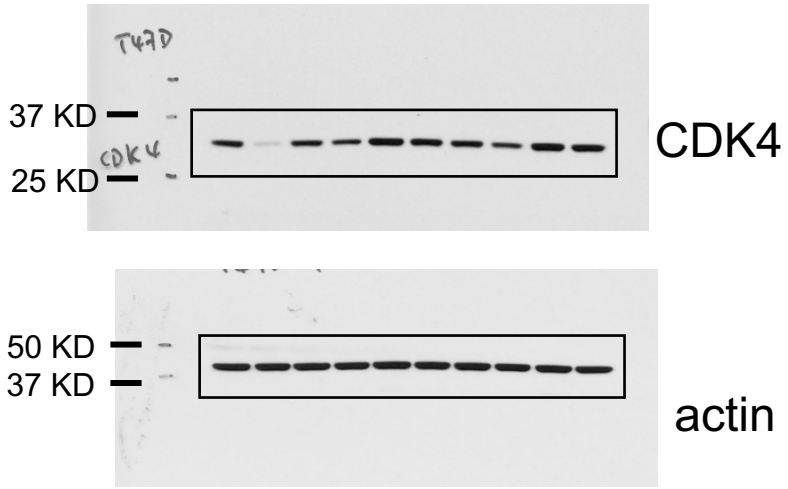

Supplement: NIHMS1684820-supplement-EXT_FIG_4__Source_Data_-_Immunoblots.pdf [file NIHMS1684820-supplement-EXT_FIG_4__Source_Data_-_Immunoblots.pdf]

**Figure 2a**

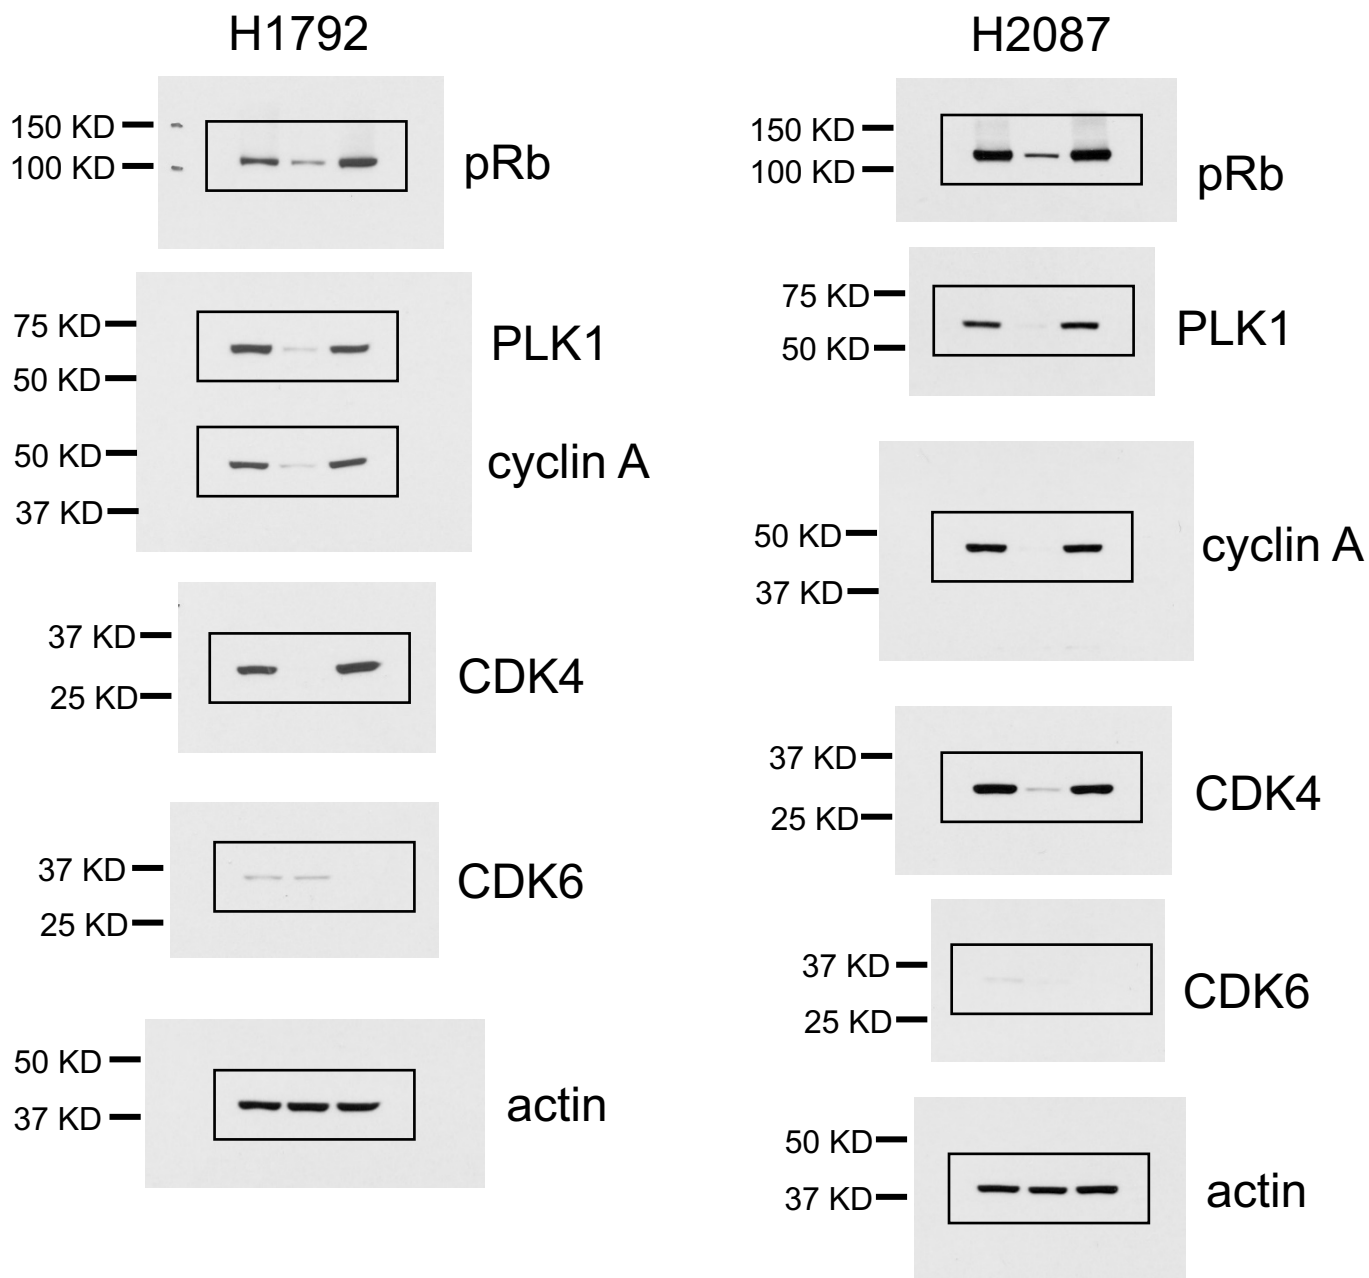

# Figure 2a

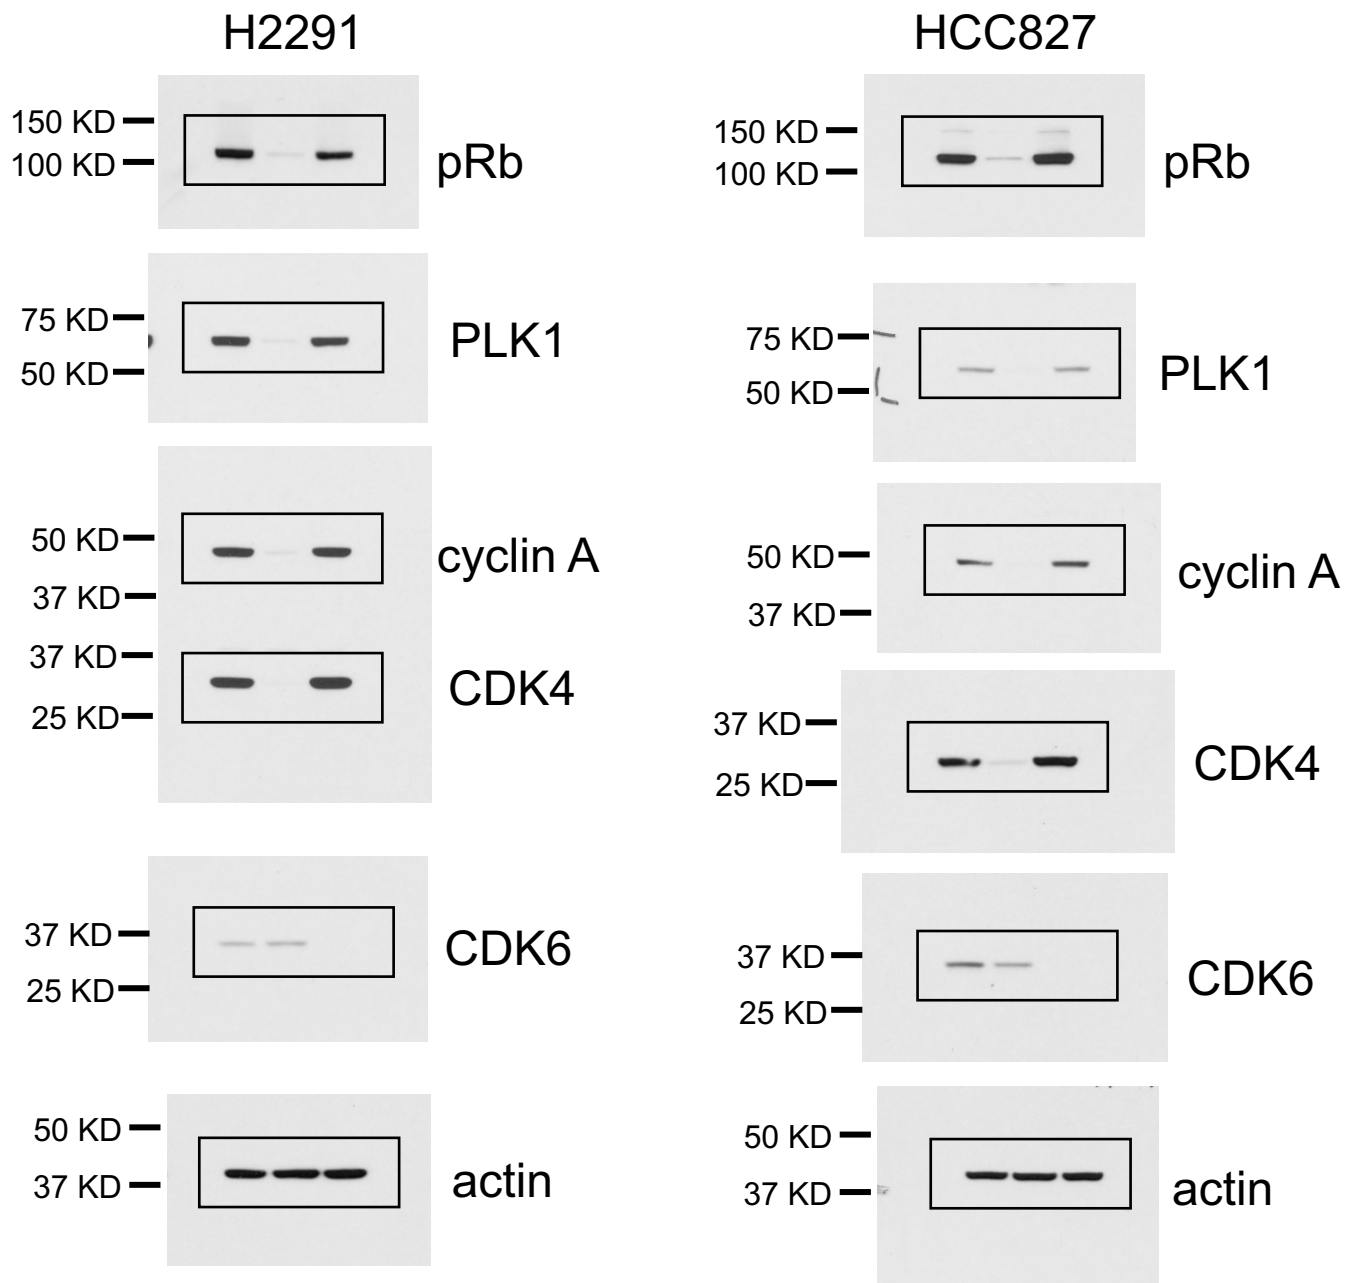

**Figure 2a**

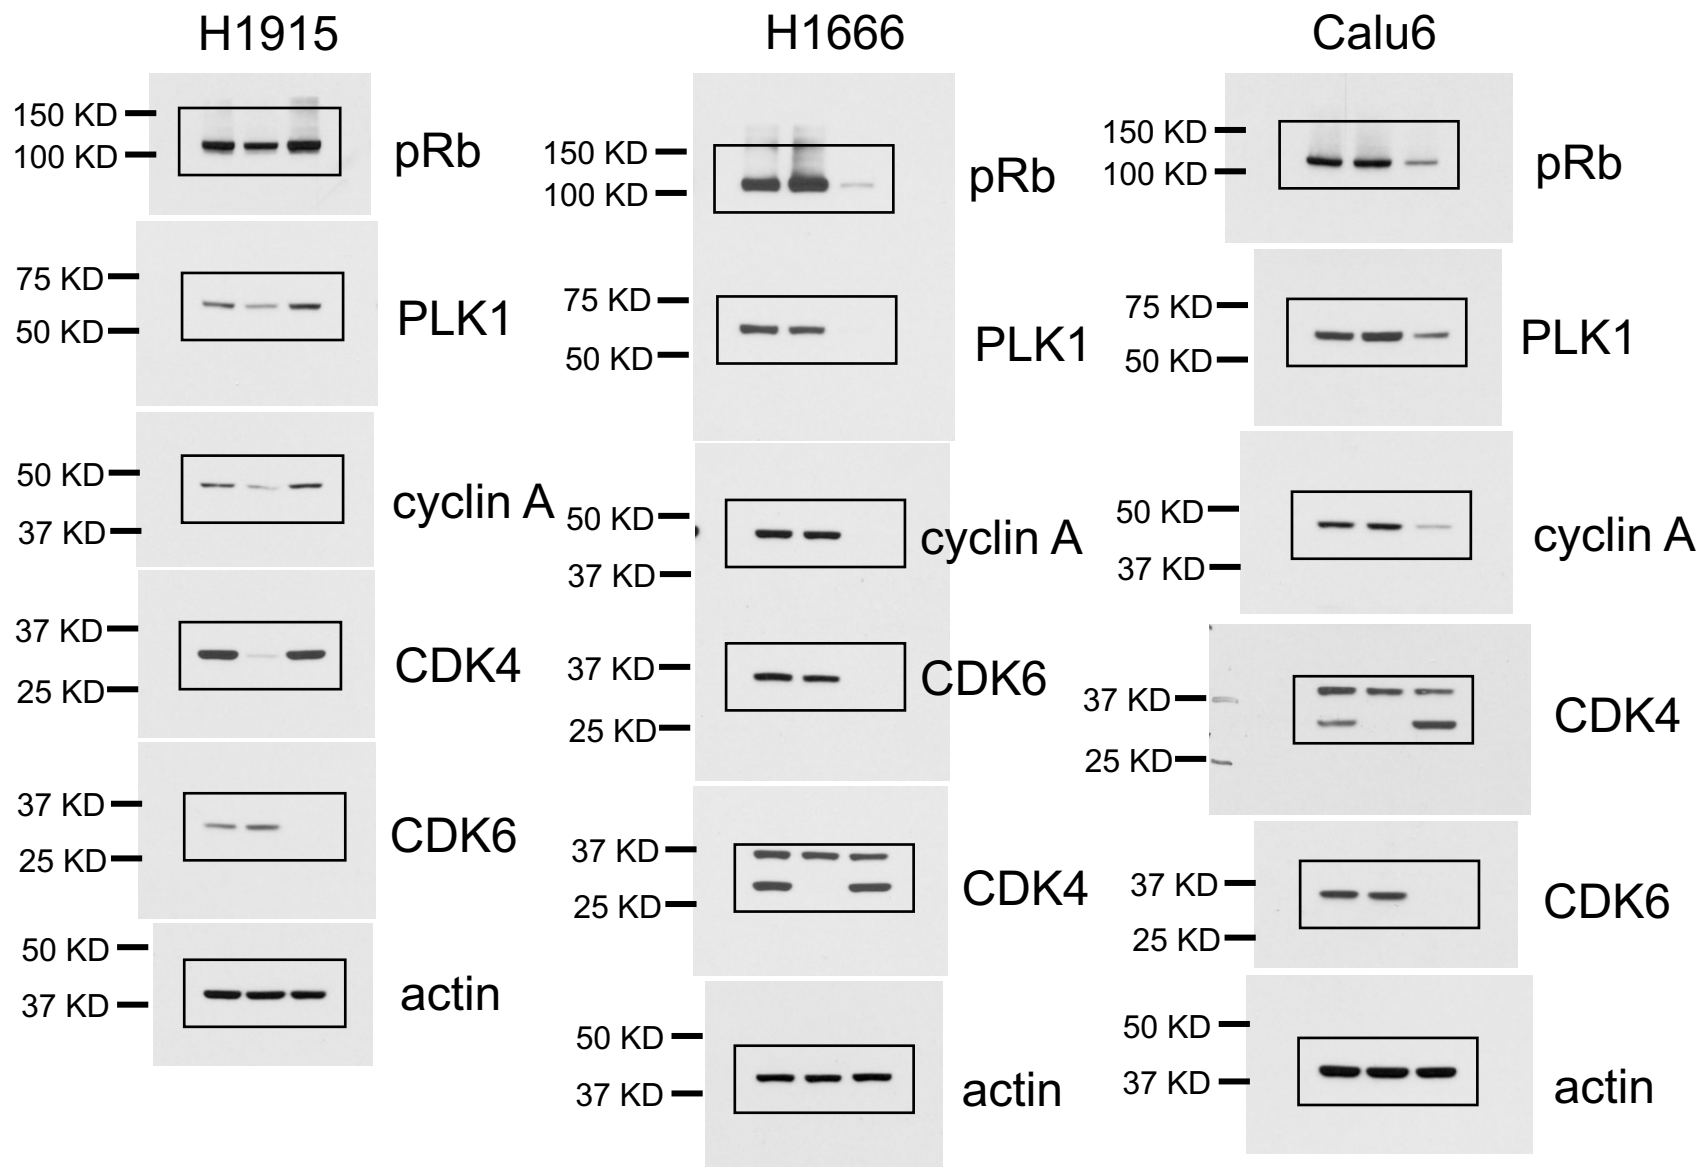

# Figure 2b

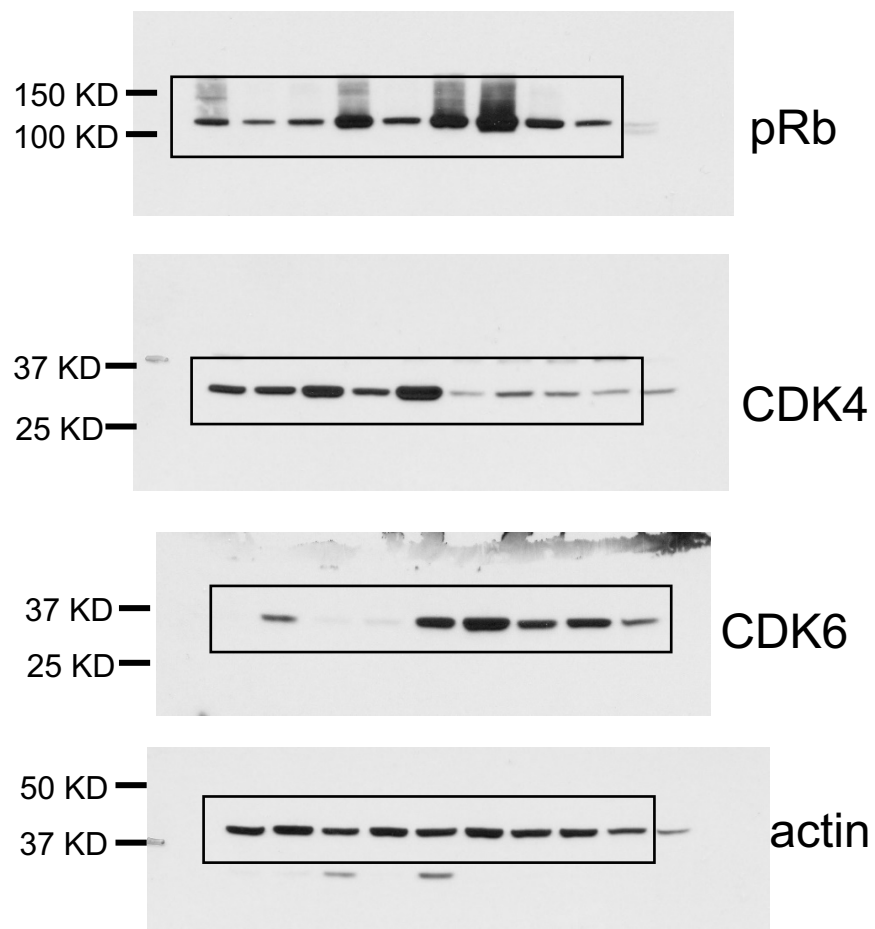

# Figure 2c

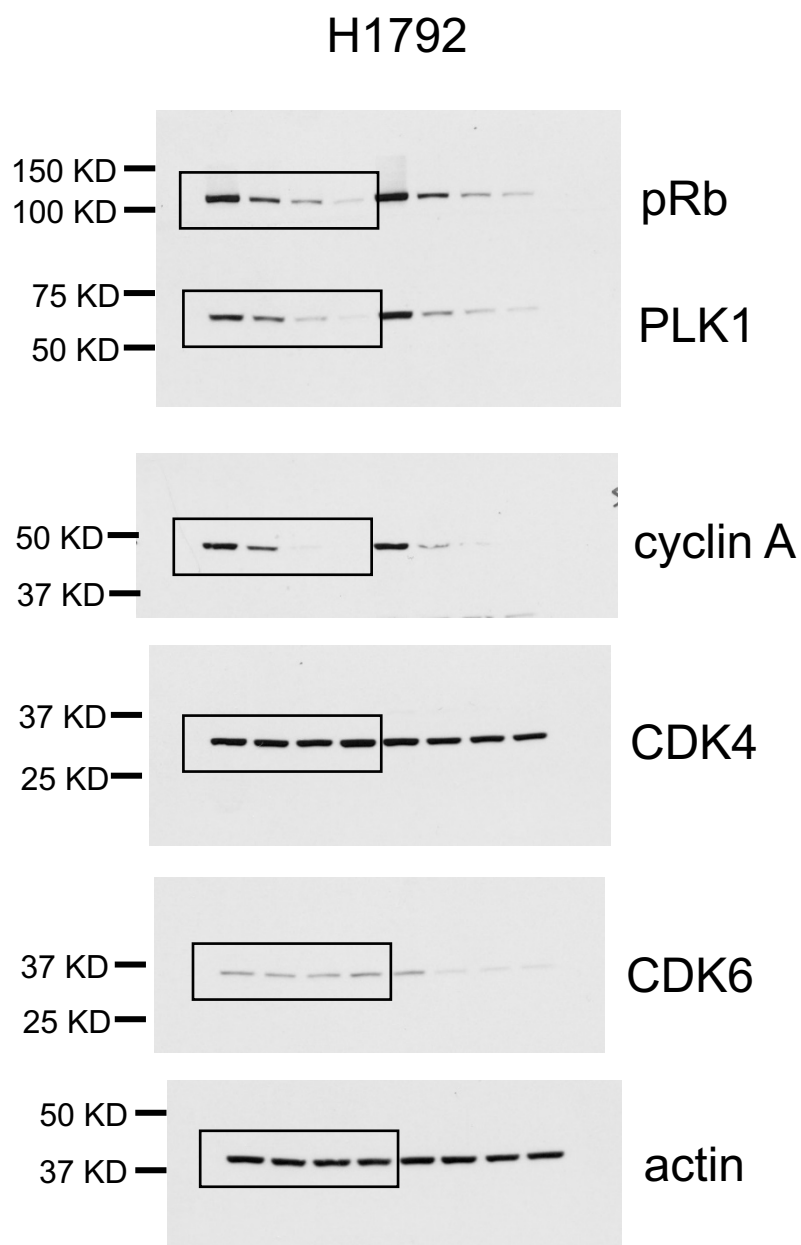

**Figure 2c**

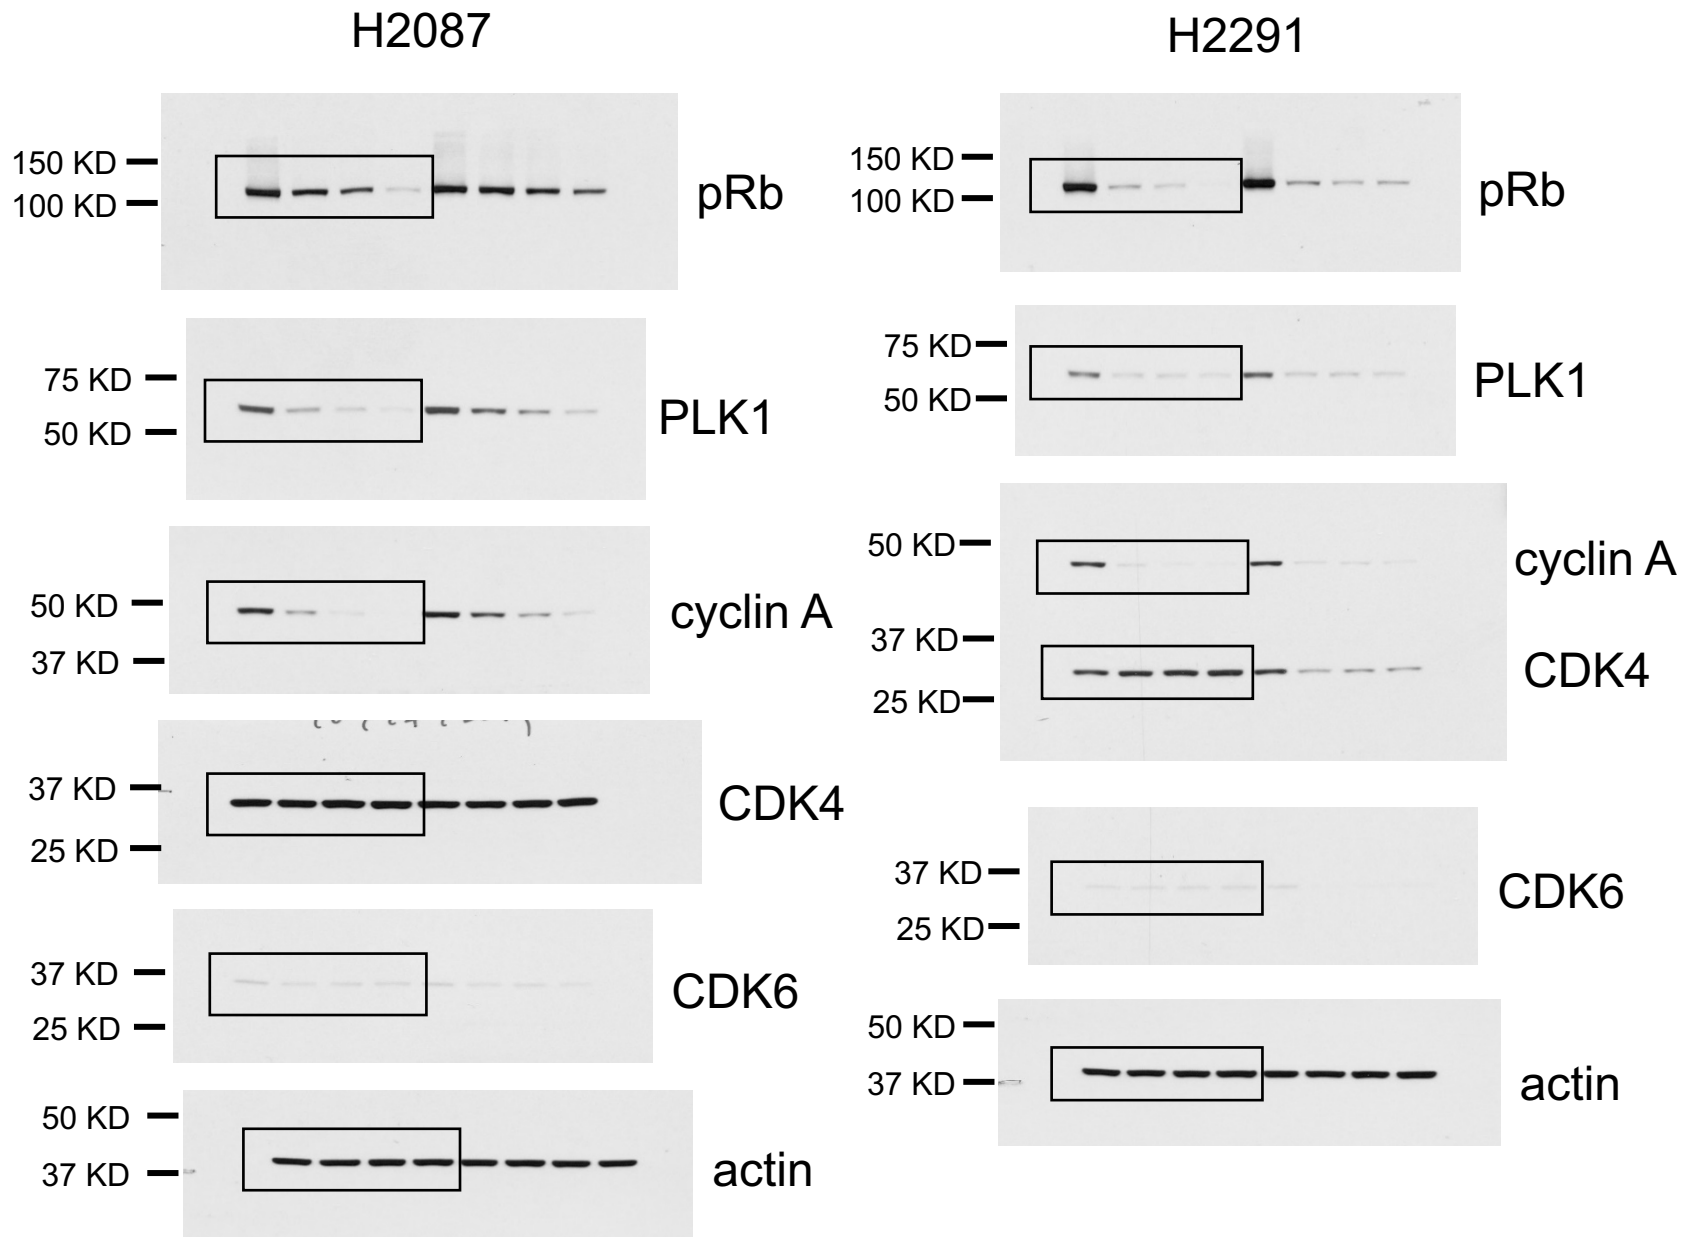

**Figure 2c**

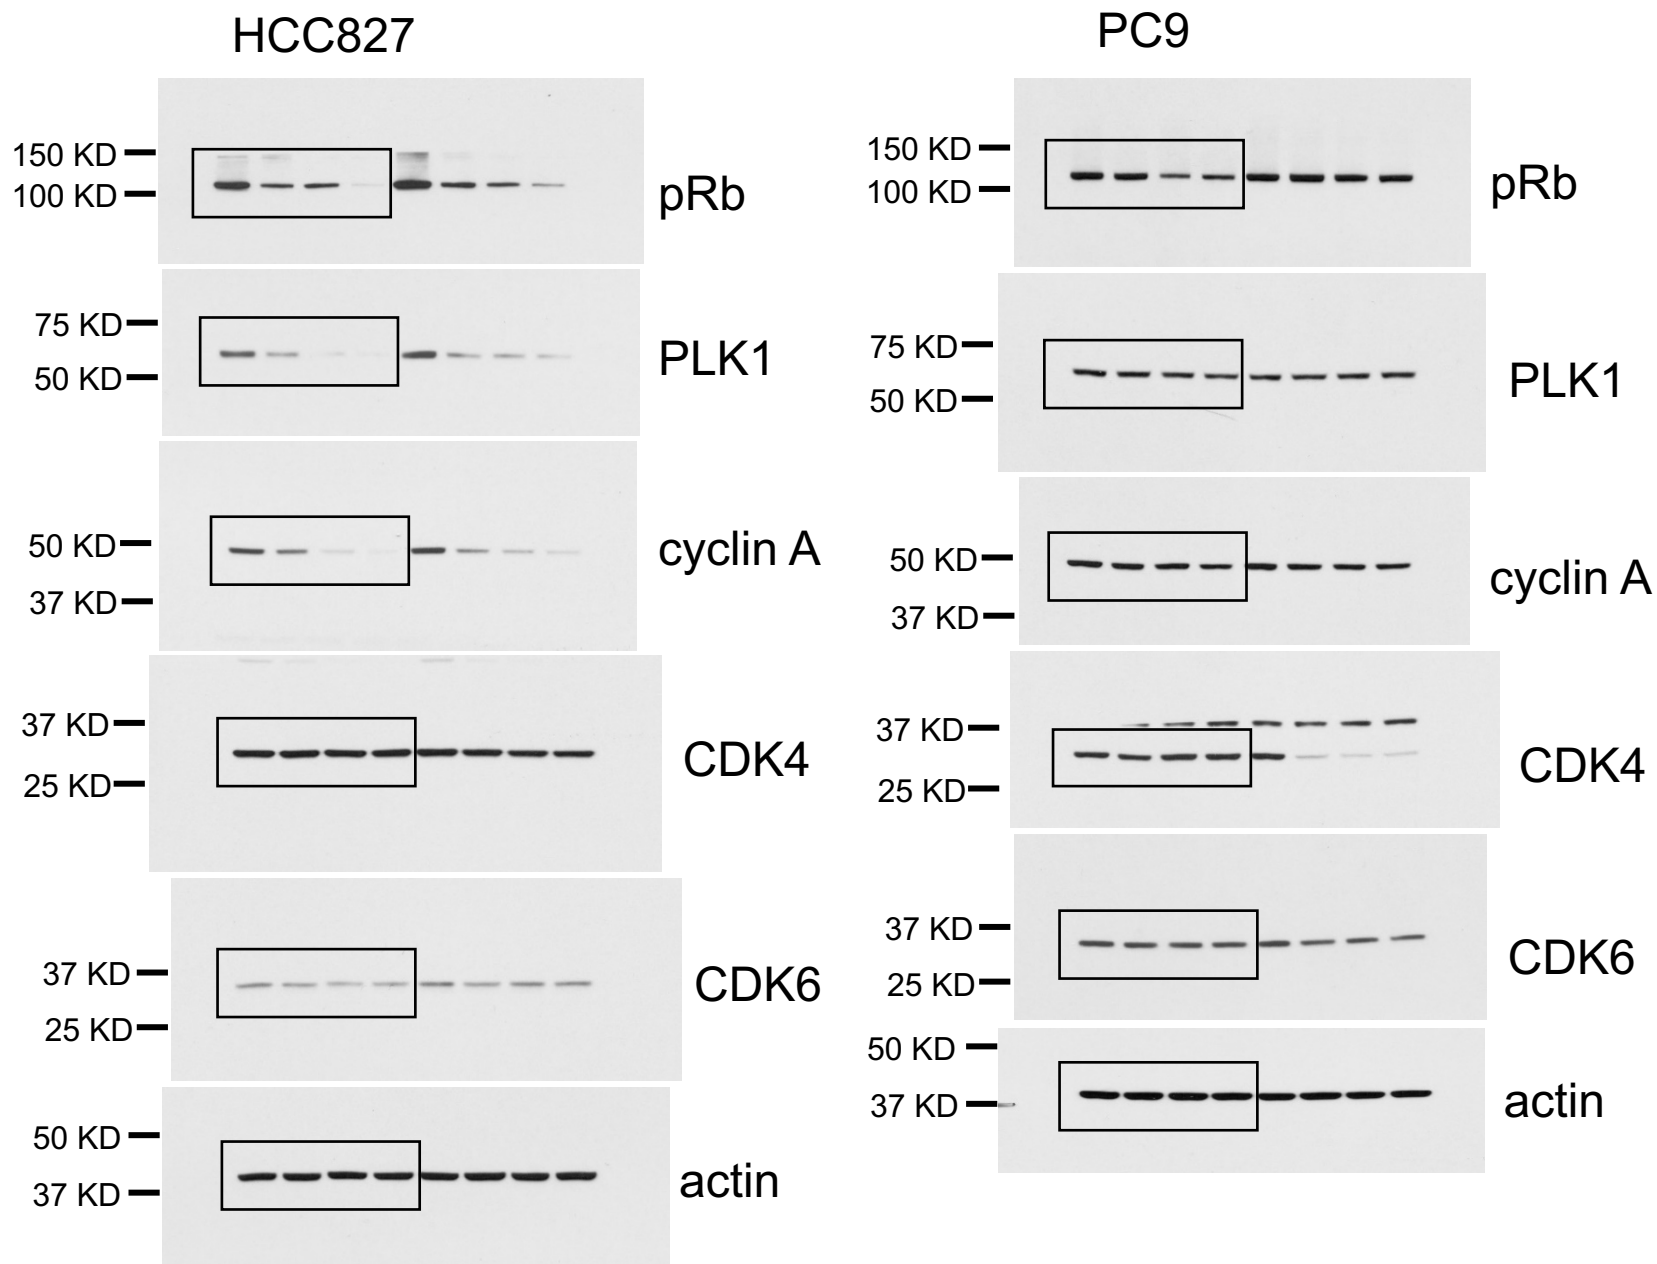

Supplement: NIHMS1684820-supplement-FIG_2__Source_Data_-_Immunoblots.pdf [file NIHMS1684820-supplement-FIG_2__Source_Data_-_Immunoblots.pdf]

**Fig 4b and 4c**

Colo205

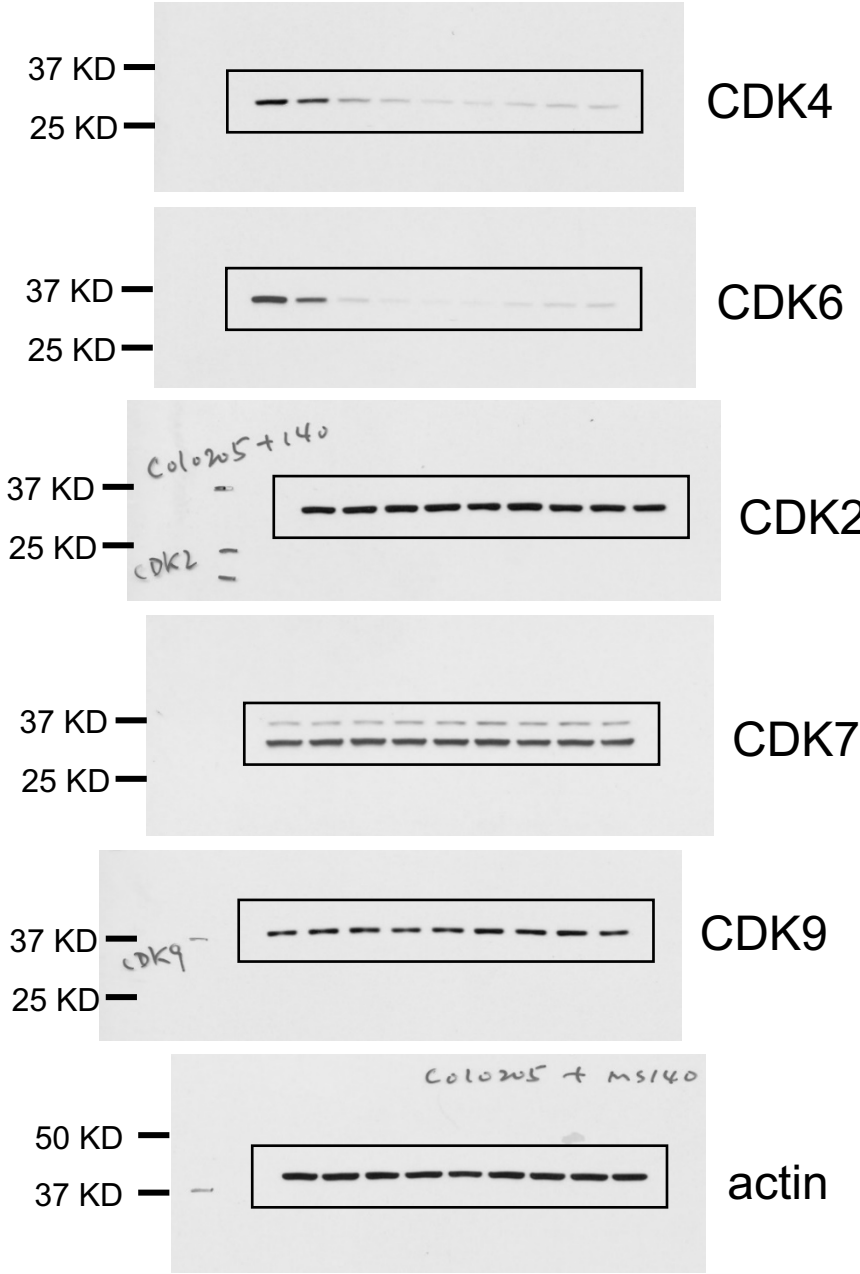

Colo205

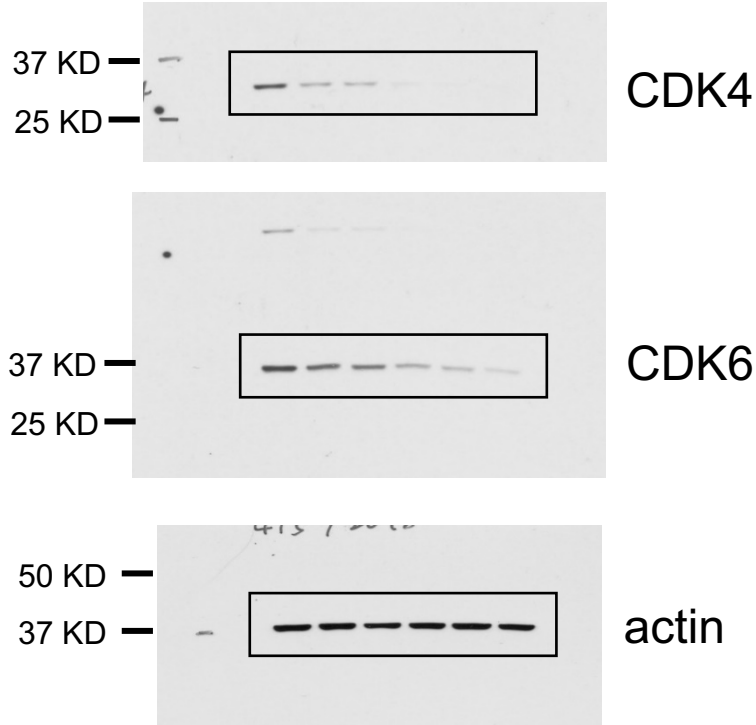

### Figure 4d

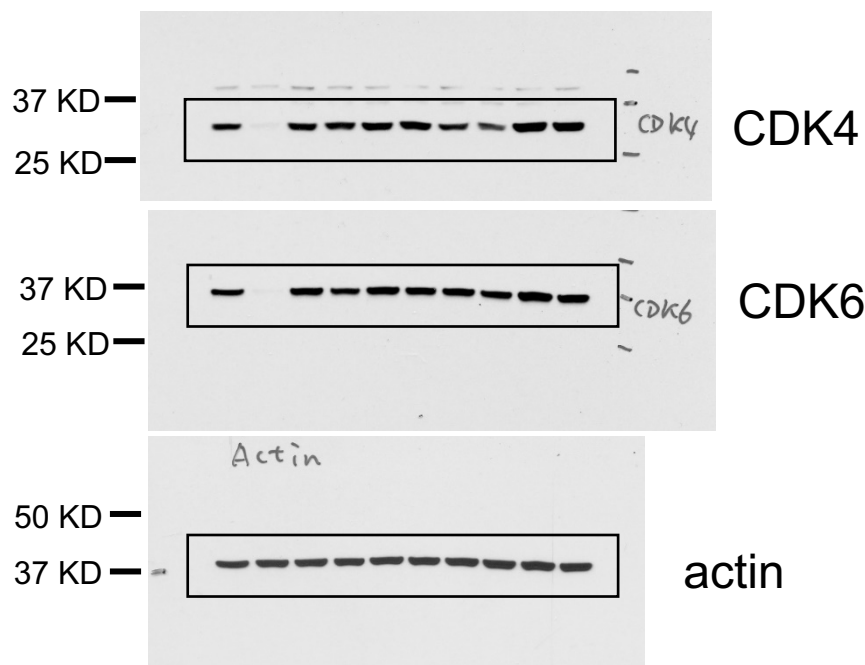

### Figure 4e

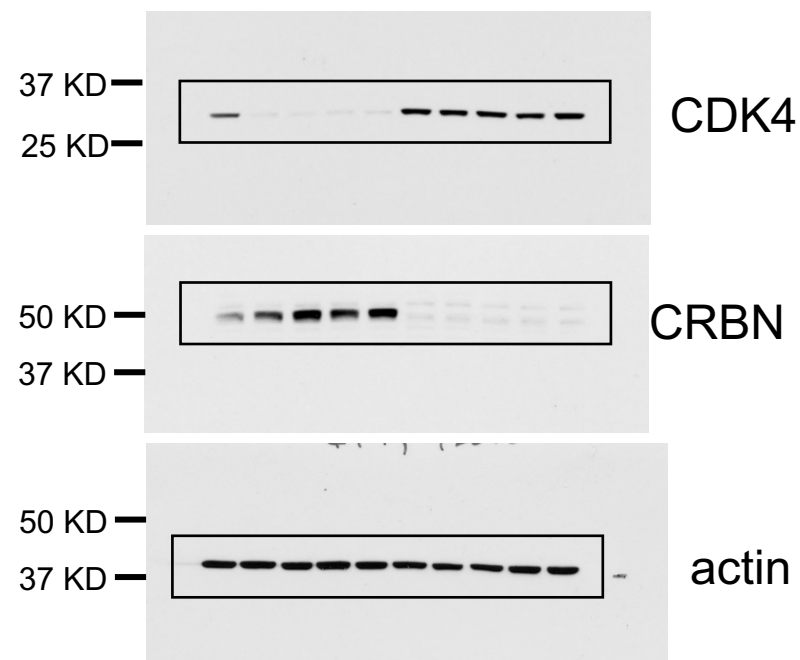

### Figure 4f

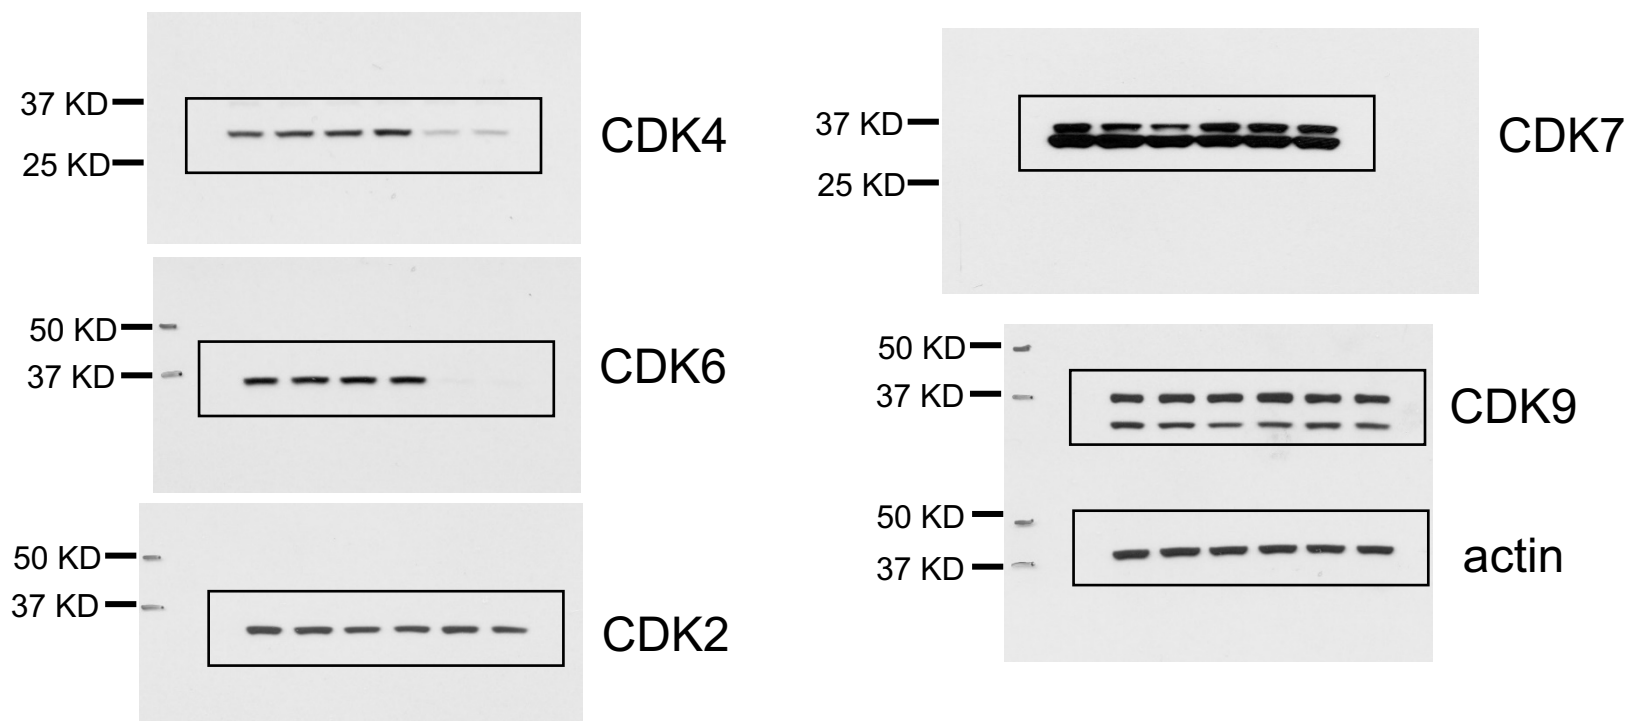

Supplement: NIHMS1684820-supplement-FIG_4__Source_Data_-_Immunoblots.pdf [file NIHMS1684820-supplement-FIG_4__Source_Data_-_Immunoblots.pdf]
